# Supplementary material for: Improved ANAP incorporation and VCF analysis reveal details of P2X7 current facilitation and a limited conformational interplay between ATP binding and the intracellular ballast domain
Source: eLife journal article supplement (doi:10.7554/elife.82479), 2023-01-04
Supplement: fig2-figsupp1-data2 [file VCFdata_TMRM.xlsx]

## Sheet: Sheet1
	P2X7 (TMRM-labeled)
	Expression time [days]	Oocyte batch	Recording	575-650 nm [ΔF/F%]	Current [µA]
	3	A	20f22 #17	0	-7.33658
	2	C	20h27 #04	0	-4.2642
	2	C	20h27 #08	0	-2.8949
	Uninjected (TMRM-labeled)
	Expression time [days]	Oocyte batch	Recording	575-650 nm [ΔF/F%]	Current [µA]
	3	A	20f22 #18	0	-0.00973
	2	B	20g09 #25	0	-0.01133
	2	B	20g09 #31	0	-0.01298
	2	B	20g09 #32	0	-0.01135
	2	B	20g09 #33	0	-0.00811
	P2X7(P120*)
	Expression time [days]	Oocyte batch	Recording	575-650 nm [ΔF/F%]	Current [µA]
	2	B	20g09 #18	0	-5.5978
	2	B	20g09 #23	0	-5.6605
	2	C	20h27 #03	0	-3.4567
	2	C	20h27 #11	0	-6.6375
	P2X7(E121*)
	Expression time [days]	Oocyte batch	Recording	575-650 nm [ΔF/F%]	Current [µA]
	2	C	20h27 #09	0	-1.5033
	2	C	20h27 #13	0	-1.82494
	2	B	20g09 #40
	1	B	20g08 #02	0	-1.93969
	1	B	20g08 #03	0	-1.4565
	3	A	20f22 #01	1.3804	-4.4981
	P2X7(Y122*)
	Expression time [days]	Oocyte batch	Recording	575-650 nm [ΔF/F%]	Current [µA]
	1	A	20f22 #24	3.21033	-6.00956
	1	A	20f22 #29	3.5552	-6.82556
	2	B	20g09 #26	5.59215	-5.8602
	2	B	20g09 #27	5.21242	-7.0171
	2	C	20h27 #05	3.14145	-6.0418
	2	C	20h27 #07	3.83523	-5.1046
	P2X7(P123*)
	Expression time [days]	Oocyte batch	Recording	575-650 nm [ΔF/F%]	Current [µA]
	1	A	20f22 #25	0	-4.353
	1	A	20f22 #27	0	-2.63619
	1	A	20f22 #31	0	-6.16491
	1	A	20f22 #32	0	-5.7351
	1	A	20f22 #33	0	-5.13962
	2	B	20g09 #28	0	-7.3265
	2	B	20g09 #29	0	-6.9015
	2	B	20g09 #30	0	-7.7704
	2	C	20h27 #16	0	-3.7779
	2	C	20h27 #21	0	-4.5168
	P2X7(S124*)
Also used in	Expression time [days]	Oocyte batch	Recording	575-650 nm [ΔF/F%]	Current [µA]
	1	A	20f22 #26	3.23236	-5.0767
	1	A	20f22 #30	0.909041	-4.45835
	2	B	20g09 #12	4.84813	-7.1923
	2	B	20g09 #13	4.07797	-7.1821
Figure 2 - figure supplement 1 A / representative VCF recording	2	B	20g09 #14	6.76911	-5.9266
	2	B	20g09 #15	3.19522	-5.2645
	2	B	20g09 #16	3.54756	-5.6497
	2	C	20h27 #17	1.91747	-6.4215
	2	C	20h27 #24	2.35963	-4.0617
	P2X7(R125*)
	Expression time [days]	Oocyte batch	Recording	575-650 nm [ΔF/F%]	Current [µA]
	3	A	20f22 #15	1.03455	-7.54724
	3	A	20f22 #16	3.32582	-7.357
	3	A	20f22 #19	1.61362	-8.74775
	2	B	20g09 #22	1.25044	-6.4719
	2	C	20h27 #18	0.535224	-4.5613
	2	C	20h27 #25	1.04068	-5.9803
	2	C	20h27 #26	1.52279	-4.54334
	P2X7(G126*)
	Expression time [days]	Oocyte batch	Recording	575-650 nm [ΔF/F%]	Current [µA]
	3	A	20f22 #21	0	-7.14289
	2	B	20g09 #44	0	-6.5192
	2	C	20h27 #10	0	-4.9083
	2	C	20h27 #20	0	-4.0112
	P2X7(K127*)
	Expression time [days]	Oocyte batch	Recording	575-650 nm [ΔF/F%]	Current [µA]
	3	A	20f22 #02
	2	B	20g09 #07	5.23085	-6.8092
	2	B	20g09 #11	3.70089	-6.66296
	2	C	20h27 #01	1.98103	-4.0811
	2	C	20h27 #02	1.01896	-5.49218
	P2X7(Q128*)
	Expression time [days]	Oocyte batch	Recording	575-650 nm [ΔF/F%]	Current [µA]
	2	B	20g09 #36	-3.00045	-8.9532
	2	B	20g09 #38	-3.29606	-6.3365
	2	C	20h27 #14	-0.848948	-5.6852
	2	C	20h27 #15	-1.04407	-6.5012
