# Supplementary material for: Improved ANAP incorporation and VCF analysis reveal details of P2X7 current facilitation and a limited conformational interplay between ATP binding and the intracellular ballast domain
Source: eLife journal article supplement (doi:10.7554/elife.82479), 2023-01-04
Supplement: fig3-figsupp3-data1 [file VCFdata_mutants.xlsx]

## Sheet: Delta
	P2X7(Delta)													P2X7(Delta)
				> 500 nm [ΔF/F%]		430-490 nm [ΔF/F%]		Current [µA]									470-500 nm [ΔF/F%]		430-470 nm [ΔF/F%]		Current [µA]
Also used in	Expression time [days]	Oocyte batch	Recording	1st Application	2nd Application	1st Application	2nd Application	1st Application	2nd Application	inclusion criteria for analysis are met			Also used in	Expression time [days]	Oocyte batch	Recording	1st Application	2nd Application	1st Application	2nd Application	1st Application	2nd Application	inclusion criteria for analysis are met
	5	H	m06 #01					-0.1833		No				4	14	d30 #13					-1.0449	-1.0558	No
Fig.3-Fig.Suppl.3-B, Boxplot	5	H	m06 #24	no F				-0.8793	-0.8045	Yes				3	14	d29 #01					-1.4792	-1.4387	No
	4	H	m05 #07					-0.9573	-0.7981	No				3	14	d29 #13					-2.272	-2.22	No
	4	H	m05 #13					no current		No				2	14	d28 #08					-2.9475	-2.5493	No
	4	H	m05 #18					-0.6796	-0.27409	No				7	24	d26 #29							No
	6	G	l24 #01					-1.0818	-0.8714	No				4	24	d23 #17					-1.8314	-1.8055	No
	5	G	l23 #24					no current		No				3	24	d22 #07					-1.4452	-1.6206	No
Fig.3-Fig.Suppl.3-B, Boxplot	3	E	l14 #13	no F				-1.5019	-1.4128	Yes				3	24	d22 #15					-2.3227	-2.2695	No
	5	D	l09 #07					-0.5839	-0.5612	No				1	24	d20 #18					no current		No
Fig.3-Fig.Suppl.3-B, Boxplot	4	D	l08 #14	no F				-0.9956	0.99756	Yes
	4	D	l08 #15					-2.1911	-1.971	No
	3	D	l07 #13					-0.6426	-0.6604	No
	3	D	l07 #18					-0.4558		No
Fig.3-Fig.Suppl.3-A, Fig.3-Fig.Suppl.3-B, Boxplot	3	5	k05 #19	no F				-1.25205	-1.25413	Yes
	3	5	k05 #20					-0.24655	-0.22543	No
Fig.3-Fig.Suppl.3-B, Boxplot	3	5	k05 #21	no F				-1.0138	-1.002	Yes
	3	5	k05 #22					-1.0621	-0.88558	No
	2	5	k04 #05					no current		No
	2	5	k04 #06					-0.2482	-0.17521	No
	P2X7(Delta, F11*)													P2X7(Delta, N356*)
				> 500 nm [ΔF/F%]		430-490 nm [ΔF/F%]		Current [µA]									470-500 nm [ΔF/F%]		430-470 nm [ΔF/F%]		Current [µA]
Also used in	Expression time [days]	Oocyte batch	Recording	1st Application	2nd Application	1st Application	2nd Application	1st Application	2nd Application	inclusion criteria for analysis are met			Also used in	Expression time [days]	Oocyte batch	Recording	1st Application	2nd Application	1st Application	2nd Application	1st Application	2nd Application	inclusion criteria for analysis are met
	6	G	l24 #02					-1.0109	-0.7217	No				4	14	d30 #12					no current		No
	6	G	l24 #03					-0.5237	-0.3131	No				3	14	d29 #06					no current		No
	6	F	l24 #04					-0.1216		No				3	14	d29 #10					no current		No
	6	G	l24 #05					-0.2222		No				3	14	d29 #11					no current		No
	6	F	l24 #06					no current		No				3	14	d29 #12					no current		No
	6	F	l24 #07					no current		No
	5	F	l23 #32					no current		No
	5	G	l23 #31					-0.1119	-0.039	No
	4	E	l15 #14					-1.7959		No
	3	E	l14 #19					-0.1703	-0.1395	No
	P2X7(Delta, S124*)													P2X7(Delta, Y358*)
				> 500 nm [ΔF/F%]		430-490 nm [ΔF/F%]		Current [µA]									470-500 nm [ΔF/F%]		430-470 nm [ΔF/F%]		Current [µA]
Also used in	Expression time [days]	Oocyte batch	Recording	1st Application	2nd Application	1st Application	2nd Application	1st Application	2nd Application	inclusion criteria for analysis are met			Also used in	Expression time [days]	Oocyte batch	Recording	1st Application	2nd Application	1st Application	2nd Application	1st Application	2nd Application	inclusion criteria for analysis are met
	6	G	l24 #08					-0.167	-0.0941	No				10	24	d29 #15							No
	6	F	l24 #09					no current		No				8	24	d27 #30							No
	5	F	l23 #30					no current		No				8	24	d27 #31							No
	5	G	l23 #29					-0.38767	-0.20116	No				7	24	d26 #26					-1.0056	-0.9894	No
	5	G	l23 #28					no current		No				4	24	d23 #12					-0.4883	-0.2708	No
	4	E	l15 #05					-0.217		No				4	24	d23 #13					no current		No
	4	E	l15 #09					-1.2082	-1.0169	No				3	24	d22 #01					-0.2563	-0.2936	No
	3	E	l14 #15					-0.5758	-0.4298	No				1	24	d20 #19					no current		No
	P2X7(Delta, K127*)													P2X7(Delta, A359*)
				> 500 nm [ΔF/F%]		430-490 nm [ΔF/F%]		Current [µA]									470-500 nm [ΔF/F%]		430-470 nm [ΔF/F%]		Current [µA]
Also used in	Expression time [days]	Oocyte batch	Recording	1st Application	2nd Application	1st Application	2nd Application	1st Application	2nd Application	inclusion criteria for analysis are met			Also used in	Expression time [days]	Oocyte batch	Recording	1st Application	2nd Application	1st Application	2nd Application	1st Application	2nd Application	inclusion criteria for analysis are met
	6	G	l24 #21					-1.2419	-1.1111	No				8	24	d27 #34							No
	6	G	l24 #22					-0.3763	-0.1914	No				7	24	d26 #06					-0.4707	-0.4562	No
	6	G	l24 #23					-0.839	-0.8339	No				4	24	d23 #04					-0.1071	-0.0778	No
	6	G	l24 #24					-0.4417	-0.4089	No				4	24	d23 #05					no current		No
	5	G	l23 #27					-1.42424	-1.06697	No				4	24	d23 #09					-0.1216	-0.1103	No
	5	F	l23 #26					-0.21573	-0.14115	No
	5	G	l23 #25					-0.45091	-0.23681	No
	4	E	l15 #02	-2.20323	-2.55732	-1.46961	-1.27955	-1.805	-1.7254	Yes
	4	E	l15 #03					-1.2963	-1.2586	No
	4	E	l15 #06					-1.9497		No
	3	E	l14 #16					-0.1817	-0.12	No
	3	E	l14 #20					-0.2336	-0.20436	No
	P2X7(Delta, D423*)													P2X7(Delta, A378*)
				> 500 nm [ΔF/F%]		430-490 nm [ΔF/F%]		Current [µA]									470-500 nm [ΔF/F%]		430-470 nm [ΔF/F%]		Current [µA]
Also used in	Expression time [days]	Oocyte batch	Recording	1st Application	2nd Application	1st Application	2nd Application	1st Application	2nd Application	inclusion criteria for analysis are met			Also used in	Expression time [days]	Oocyte batch	Recording	1st Application	2nd Application	1st Application	2nd Application	1st Application	2nd Application	inclusion criteria for analysis are met
	6	G	l24 #12	no F				-1.1634	-1.2371	Yes				9	24	d28 #13					no current		No
	6	G	l24 #13	no F				-1.139	-1.0346	Yes				9	24	d28 #14							No
	6	G	l24 #14					-0.1525		No				7	24	d26 #07							No
	6	G	l24 #15					-0.4359	-0.3004	No				4	24	d23 #00					-0.59689	-0.62124	No
	6	F	l24 #16					no current		No				4	24	d23 #01	no F				-2.0505	-2.081	Yes
	6	G	l24 #26					no current		No				3	24	d22 #02					-0.266	-0.2546	No
	4	E	l15 #26					-1.4368	-1.2833	No				3	24	d22 #03					no current		No
	4	E	l15 #27					-0.2384	-0.1686	No				3	24	d22 #11					no current		No
	3	E	l14 #17					-0.2514	-0.2546	No
	P2X7(Delta, A564*)
				> 500 nm [ΔF/F%]		430-490 nm [ΔF/F%]		Current [µA]
Also used in	Expression time [days]	Oocyte batch	Recording	1st Application	2nd Application	1st Application	2nd Application	1st Application	2nd Application	inclusion criteria for analysis are met
	6	G	l24 #17					-0.2384	-0.1525	No
	6	G	l24 #18					no current		No
	6	G	l24 #19					-0.3535	-0.247	No
	6	F	l24 #20					no current		No
	4	E	l15 #10					-0.7917	-0.4944	No
	4	E	l15 #22	no F				-1.3622	-1.3109	Yes
	4	E	l15 #23					-0.172	-0.1671	No
	4	E	l15 #24					-1.2571	-1.2988	No
	4	E	l15 #25					-0.8632	-0.6212	No
	3	E	l14 #18					-0.3893	-0.2887	No

## Sheet: Cys-Ala
	P2X7(Cys-Ala)														P2X7(Cys-Ala)
				> 500 nm [ΔF/F%]		430-490 nm [ΔF/F%]		Current [µA]										470-500 nm [ΔF/F%]		430-470 nm [ΔF/F%]		Current [µA]
Also used in	Expression time [days]	Oocyte batch	Recording	1st Application	2nd Application	1st Application	2nd Application	1st Application	2nd Application	inclusion criteria for analysis are met				Also used in	Expression time [days]	Oocyte batch	Recording	1st Application	2nd Application	1st Application	2nd Application	1st Application	2nd Application	inclusion criteria for analysis are met
	5	D	l09 #08					-0.3487	-0.193	No					3	16	b19 #04					-0.49465	-0.34712	No
Fig.3-Fig.Suppl.3-A	4	D	l08 #16					-0.61313	-0.41683	No					3	16	b19 #21					-0.49304	-0.18165	No
	4	D	l08 #17					no current		No
	3	D	l07 #19					-0.4865	-0.3292	No
	4	5	k06 #56					no current		No
	3	5	k05 #11							No
	3	5	k05 #13					-0.10702	-0.05352	No
	3	5	k05 #14					-0.5953		No
	3	5	k05 #15					-0.1103	-0.11026	No
	3	5	k05 #41					-0.81094	-0.47202	No
	3	5	k05 #42					no current		No
	2	5	k04 #09					-0.19142	-0.1622	No
	2	5	k04 #10					no current		No					P2X7(Cys-Ala, C371*)
	2	5	k04 #11					no current		No								470-500 nm [ΔF/F%]		430-470 nm [ΔF/F%]		Current [µA]
														Also used in	Expression time [days]	Oocyte batch	Recording	1st Application	2nd Application	1st Application	2nd Application	1st Application	2nd Application	inclusion criteria for analysis are met
															10	16	b26 #06					no current		No
															10	16	b26 #15					no current		No
															9	16	b25 #25					-0.159		No
															8	16	b24 #15					no current		No
															7	16	b23 #14					no current		No
															7	16	b23 #15					no current		No
															6	16	b22 #00					no current		No
															6	16	b22 #15					no current		No
															3	16	b19 #09					no current		No
															3	16	b19 #10					no current		No
															P2X7(Cys-Ala, T361*)
																		470-500 nm [ΔF/F%]		430-470 nm [ΔF/F%]		Current [µA]
														Also used in	Expression time [days]	Oocyte batch	Recording	1st Application	2nd Application	1st Application	2nd Application	1st Application	2nd Application	inclusion criteria for analysis are met
															10	a	b26 #16					-0.4039	-0.2579	No
															9	a	b25 #24					no current		No
															8	a	b24 #16					no current		No
															7	a	b23 #16					-0.24169	-0.21733	No
															7	a	b23 #17					-0.1022	-0.06166	No
															6	a	b22 #13					-0.1119	-0.0779	No
															6	a	b22 #14					-0.14432	-0.1249	No
															3	a	b19 #07					no current		No
															3	a	b19 #08					no current		No

## Sheet: S23N
	P2X7(S23N)
				> 500 nm [ΔF/F%]		430-490 nm [ΔF/F%]		Current [µA]
Also used in	Expression time [days]	Oocyte batch	Recording	1st Application	2nd Application	1st Application	2nd Application	1st Application	2nd Application	inclusion criteria for analysis are met
	1	G	l23 #38							No
	5	G	l23 #19					-0.1849	-0.3146	No
	5	G	l23 #20					-0.21733	-0.19624	No
	5	F	l23 #21					-0.9978	-0.84	No
	5	F	l23 #22					-0.52551	-0.41518	No
	5	F	l23 #23					no current		No
	4	G	l22 #26					-1.654	-1.674	No
	4	F	l22 #27					no current		No
	4	F	l22 #28					no current		No
Fig.3-Fig.Suppl.3-A	3	G	l21 #04					-0.3098	-0.4169	No
	P2X7(S23N, F11*)
				> 500 nm [ΔF/F%]		430-490 nm [ΔF/F%]		Current [µA]
Also used in	Expression time [days]	Oocyte batch	Recording	1st Application	2nd Application	1st Application	2nd Application	1st Application	2nd Application	inclusion criteria for analysis are met
	6	G	l24 #34					-0.10863	-0.20116	No
	P2X7(S23N, S124*)
				> 500 nm [ΔF/F%]		430-490 nm [ΔF/F%]		Current [µA]
Also used in	Expression time [days]	Oocyte batch	Recording	1st Application	2nd Application	1st Application	2nd Application	1st Application	2nd Application	inclusion criteria for analysis are met
	6	G	l24 #27					no current		No
	5	F	l23 #39					no current		No
	P2X7(S23N, K127*)
				> 500 nm [ΔF/F%]		430-490 nm [ΔF/F%]		Current [µA]
Also used in	Expression time [days]	Oocyte batch	Recording	1st Application	2nd Application	1st Application	2nd Application	1st Application	2nd Application	inclusion criteria for analysis are met
	6	G	l24 #29					no current		No
	5	F	l23 #17					no current		No
	4	G	l22 #23					-0.3454	-0.0568	No
	3	F	l21 #05					no current		No
	P2X7(S23N, A564*)
				> 500 nm [ΔF/F%]		430-490 nm [ΔF/F%]		Current [µA]
Also used in	Expression time [days]	Oocyte batch	Recording	1st Application	2nd Application	1st Application	2nd Application	1st Application	2nd Application	inclusion criteria for analysis are met
	6	G	l24 #25					no current		No
	4	G	l22 #18					no current		No
