# Supplementary material for: Improved ANAP incorporation and VCF analysis reveal details of P2X7 current facilitation and a limited conformational interplay between ATP binding and the intracellular ballast domain
Source: eLife journal article supplement (doi:10.7554/elife.82479), 2023-01-04
Supplement: fig5-figsupp1-data1 [file VCFdata_Fig-5_fig-suppl-1.xlsx]

## Sheet: Sheet1
	P2X7(F11*)
				> 500 nm [ΔF/F%]		430-490 nm [ΔF/F%]		Current [µA]
Also used in	Expression time [days]	Oocyte batch	Recording	1st Application	2nd Application	1st Application	2nd Application	1st Application	2nd Application
Fig. 5 - fig. suppl. 1 A	5	3	h25 #30	2.08777	1.51987	2.2225	1.30697	-2.8737	-2.963
	5	3	h25 #31	1.48715	1.23362	2.20243	1.40354	-2.3766	-2.5192
	5	3	h25 #33	0.894326	1.91407	0.865325	1.75037	-1.4403	-1.51972
	6	3	h26 #14	0.281169	0.406371	0.546557	0.364007	-2.3665	-2.37602
	6	3	h26 #15	0.661111	0.561285	2.22087	1.00851	-2.1998	-2.31107
	6	3	h26 #42	0.245875	0.262045	0.920232	0.44709	-2.65078	-2.73254
	6	7	j09 #19	0.675006	0.660134	0.95634	0.384553	-2.0614	-2.058
	6	7	j09 #30	0.688954	0.564582	1.22092	0.502105	-2.5904	-2.5453
	7	7	j10 #04	0.252227	0.360214	1.40444	0.844635	-2.4894	-2.283
	7	7	j10 #09	0.0967205	0	0.881479	0.603181	-2.7528	-2.7444
	5	4	k02 #09	0	0	0.912506	0.448949	-2.3905	-2.3566
	4	5	k06 #30	0.928724	0.822585	1.19933	0.739064	-1.69286	-1.74835
	6	5	k08 #36	0.333585	0.294728	0.635364	0.622835	-1.6219	-1.6736
	6	8	m09 #22	0.333767	0.435314	0.623804	0.426505	-2.0085	-2.021
	P2X7(W7A, F11*)
				> 500 nm [ΔF/F%]		430-490 nm [ΔF/F%]		Current [µA]
Also used in	Expression time [days]	Oocyte batch	Recording	1st Application	2nd Application	1st Application	2nd Application	1st Application	2nd Application
Fig. 5 - fig. suppl. 1 A	6	5	k08 #28	1.20494	0.63698	2.43685	1.30826	-1.8317	-1.9239
	6	5	k08 #35	1.00014	1.06605	1.38005	1.11464	-2.1087	-2.12358
	6	8	m09 #33	0.370881	0.0504273	0.605879	0.153758	-0.9929	-1.04
	6	8	m09 #34	0.501312	0.191528	0.40974	0.242787	-1.1122	-1.1809
	6	8	m09 #35	0.415803	0.0763149	0.426674	0.17258	-1.6921	-1.7261
