# Supplementary material for: Improved ANAP incorporation and VCF analysis reveal details of P2X7 current facilitation and a limited conformational interplay between ATP binding and the intracellular ballast domain
Source: eLife journal article supplement (doi:10.7554/elife.82479), 2023-01-04
Supplement: fig5-figsupp2-data2 [file VCFdata_D423_A564_Ctrls.xlsx]

## Sheet: D423
	P2X7(D423*) + ANAP-MM												P2X7(D423*) + H2O (neg. control)
				> 500 nm [ΔF/F%]		430-490 nm [ΔF/F%]		Current [µA]									> 500 nm [ΔF/F%]		430-490 nm [ΔF/F%]		Current [µA]
Also used in	Expression time [days]	Oocyte batch	Recording	1st Application	2nd Application	1st Application	2nd Application	1st Application	2nd Application	inclusion criteria for analysis are met			Also used in	Expression time [days]	Oocyte batch	Recording	1st Application	2nd Application	1st Application	2nd Application	1st Application	2nd Application	inclusion criteria for analysis are met
Fig. 5 - Fig.Supp. 2	5	I	22m06-06	0.0991135	0.0131652	0.269694	0.0247831	-1.7805	-1.7111	Yes				5	I	22m06-17					-0.026	-0.0244	No
	5	I	22m06-07					-0.7264	-0.7367	No				5	I	22m06-18					-0.0778	-0.0308	No
	5	I	22m06-08					-1.45475	-1.19251	No			Fig. 5 - Fig.Supp. 2	5	I	22m06-19					-0.10709	-0.04218	No
	5	I	22m06-09					-0.8886	-0.7496	No
	5	I	22m06-14					-2.19946	-1.95146	No
	5	I	22m06-15							No
	5	I	22m06-16	0.384122	0.220656	0.64984	0.300641	-1.45054	-1.50505	No
	5	I	22m06-26					-0.8065	-0.7205	No
	5	I	22m06-27					-1.44375	-1.23786	No
	5	I	22m06-28					-1.6524	-1.4982	No
	5	I	22m06-29							No
	4	I	22m05-10					-0.3488	-0.326	No
	4	I	22m05-11					-0.0763		No
	4	I	22m05-12					no current		No
	7	7	j10 #08					-1.622	-1.731	No
	7	7	j10 #24							No
	7	7	j10 #25					-1.3268	-1.031	No
	6	7	j09 #06					-2.4571	-2.1788	No
	6	7	j09 #08					-2.2273	-1.9985	No
	6	7	j09 #09							No
	6	7	j09 #11					-1.849	-1.664	No
	5	7	j08 #10					-2.266	-2.149	No
	5	7	j08 #11					-2.40178	-2.46091	No
	5	7	j08 #12					-2.45438	-2.488	No
Fig. 5D / plot	5	7	j08 #18	0	0	0	0	-1.5522	-1.5421	Yes
	5	7	j08 #42					-1.358	-1.3932	No
	7	15	j03 # 01					-2.83	-2.628	No
	7	15	j03 #02					-2.8818	-2.6128	No
	7	15	j03 #03							No
	7	15	j03 #04							No
Fig. 5D / plot	7	15	j03 #05	0	0	0	0	-2.9633	-2.9844	Yes
	6	15	j02 #11					-1.982	-1.7973	No
Fig. 5D / plot	6	15	j02 #12	0.581933	0.464122	0	0.134184	-2.113	-2.1625	Yes
	6	15	j02 #13							No
Fig. 5D / plot	6	15	j02 #14	0	0.222196	0	0.108342	-2.4606	-2.5236	Yes
Fig. 5D / plot	6	15	j02 #24	0	0.618097	0	0.55016	-2.23662	-2.21724	Yes
	6	15	j02 #26					-2.7415	-2.426	No
Fig. 5D / plot	5	15	j01 #09	0	0	0	0	-2.6767	-2.6523	Yes
	5	15	j01 #10					-1.8632	-1.951	No
	5	15	j01 #11					-2.4524		No
	5	15	j01 #16					-1.945		No
	4	15	h31 #12					-2.16338	-2.10713	No
Fig. 5D / plot	4	15	h31 #13	0	0	0	0	-1.4161	-1.3025	Yes
	7	3	h27 #01					-2.1763	-2.1313	No
	7	3	h27 #02					-1.3903	-1.4829	No
Fig. 5D / plot	7	3	h27 #03	0	0	0	0	-2.1946	-2.2387	Yes
Fig. 5D / plot	7	3	h27 #04	0	0	0	0	-2.57913	-2.548	Yes
	7	3	h27 #05							No
Fig. 5D / plot	6	3	h26 # 31	0	0.43279	0	0.26023	-2.5559	-2.6378	Yes
Fig. 5D / plot	6	3	h26 #32	0.148886	0.424411	0.304539	0.421932	-2.03572	-2.05	Yes
	6	3	h26 #34					-2.5722	-2.548	No
Fig. 5D / plot	6	3	h26 # 48	0.234674	0.561198	0.218533	0.412599	-2.05805	-2.06029	Yes
Fig. 5D / plot	5	3	h25 #08	0	0	0	0	-1.5847	-1.4924	Yes
	5	3	h25 #09					-1.38969	-1.38467	No
Fig. 5D / plot	4	3	h24 #24	0	0.175201	0	0.179341	-2.77329	-2.76918	Yes
	4	3	h24 #25					-2.8462	-2.7799	No
Fig. 5D / plot	3	21	22a18 #21	0	0	0	0.120557	-3.2242	-3.2993	Yes
Fig. 5D / plot	3	21	22a18 #22	1.02786	1.01132	0.9781	0.938822	-2.1542	-2.0392	Yes
	3	21	22a18 #23					-1.1079	-1.0476	No
Fig. 5D / plot	3	21	22a18 #24	0	0.15055	0	0.11766	-2.405	-2.37969	Yes
	3	19	22a18 #25					-0.6699	-0.6395	No
Fig. 5D / plot	3	19	22a18 #26	0	0	0	0	-0.8755	-0.8096	Yes
	4	19	22a19 #03					-0.8674	-0.8222	No
Fig. 5D / plot	4	19	22a19 #10	0	0	0	0.25666	-0.94265	-0.89368	Yes
	4	19	22a19 #32					-0.7557	-0.6792	No
Fig. 5D / plot	5	19	22a20 #15	0	0	0	0	-1.3271	-1.2476	Yes
	5	19	22a20 #16					-0.6603	-0.585	No
Fig. 5D / plot	5	19	22a20 #17	0	0	0	0	-2.0161	-1.9937	Yes
Fig. 5D / plot	5	19	22a20 #18	0	0	0	0	-1.278	-1.2088	Yes

## Sheet: A564
	P2X7(A564*) + ANAP-MM												P2X7(A564*) + H2O (neg. control)
				> 500 nm [ΔF/F%]		430-490 nm [ΔF/F%]		Current [µA]									> 500 nm [ΔF/F%]		430-490 nm [ΔF/F%]		Current [µA]
Also used in	Expression time [days]	Oocyte batch	Recording	1st Application	2nd Application	1st Application	2nd Application	1st Application	2nd Application	inclusion criteria for analysis are met			Also used in	Expression time [days]	Oocyte batch	Recording	1st Application	2nd Application	1st Application	2nd Application	1st Application	2nd Application	inclusion criteria for analysis are met
	6	H	22m07-07					-0.6309	-0.5709	No			Fig. 5 - Fig.Supp. 2	6	H	22m07-10					-0.01622	-0.01622	No
	6	H	22m07-08					-0.6829	-0.6033	No				6	H	22m07-11					-0.01297	-0.01622	No
Fig. 5 - Fig.Supp. 2	6	H	22m07-09	0.710993	0.209493	0.897381	0.223816	-1.0283	-1.0105	Yes				6	H	22m07-12					-0.0227	-0.0097	No
	5	I	22m06-11					-0.2806		No				5	I	22m06-30					-0.01622	-0.01622	No
	5	I	22m06-12	no F				-1.76497	-1.62235	No				5	I	22m06-31					-0.0309	-0.0292	No
	5	I	22m06-13					-0.6354		No				5	I	22m06-32					-0.0422	-0.0341	No
	5	I	22m06-20					-0.4655		No				4	I	22m05-16					-0.00968	-0.0146	No
	4	I	22m05-14					-0.0113	-0.0113	No
	4	I	22m05-15					-0.16215	-0.18811	No
	3	22	22a10 #11					-0.6099	-0.6617	No
	3	22	22a10 #12					-0.29524	-0.37147	No
Fig. 5D / plot	4	22	22a11 #16	0.656626	0.423674	0.678143	0.715448	-1.50989	-1.55049	Yes
Fig. 5D / plot	4	22	22a11 #17	0.291759	0.414529	0.653665	0.682078	-2.34975	-2.41175	Yes
	4	22	22a11 #18					-0.9461	-0.9452	No
	4	22	22a11 #40					-1.148	-0.981	No
	4	22	22a11 #41					-0.85645	-0.82238	No
	5	22	22a12 #01					-1.032	-0.888	No
	5	22	22a12 #02					-0.7574	-0.7802	No
	5	22	22a12 #03					-1.18054	-1.22778	No
Fig. 5D / plot	5	22	22a12 #14	1.20212	1.28358	0.267167	1.13298	-2.38921	-2.3831	Yes
	5	22	22a12 #33					-0.7773	-0.7254	No
	5	22	22a12 #37					-1.0512	-1.0202	No
Fig. 5D / plot	5	22	22a12 #38	0.888583	1.05045	0.829886	1.30621	-1.5702	-1.4795	Yes
Fig. 5D / plot	6	22	22a13 #29	1.05958	1.17536	0.821168	1.09229	-2.2623	-2.3247	Yes
	6	22	22a13 #30					-1.9076	-1.9134	No
	6	22	22a13 #31					-2.04218	-2.09113	No
	7	22	22a14 #01					-0.9022	-0.9357	No
	3	21	22a18 #15					-0.4801	-0.4849	No
	4	19	22a19 #02					-0.8059		No
Fig. 5D / plot	4	19	22a19 #14	0.336696	0.481113	0.0632	0.352983	-0.9598	-0.951	Yes
Fig. 5D / plot	4	19	22a19 #15	0.549705	0.63222	0.515291	0.636388	-1.072	-1.108	Yes
	4	19	22a19 #22					-0.92293	-0.90671	No
Fig. 5D / plot	4	19	22a19 #23	0	0.45795	0	0.367258	-1.9804	-1.885	Yes
	4	19	22a19 #24					-1.3807	-1.4157	No
	4	19	22a19 #37					-0.133		No
	4	21	22a19 #16					-0.10705	-0.12331	No
Fig. 5D / plot	4	21	22a19 #17	0.411769	0.942139	0.033548	0.80779	-1.714	-1.7359	Yes
Fig. 5D / plot	4	21	22a19 #25	0.417533	0.748793	0.36479	0.641888	-1.2942	-1.3126	Yes
Fig. 5D / plot	4	21	22a19 #26	0	0	0	0.162136	-1.5404	-1.5607	Yes
	5	19	22a20 #01					-0.6407	-0.58395	No
Fig. 5D / plot	5	19	22a20 #02	0.819876	0.672951	0.86496	1.00406	-1.21451	-1.17438	Yes
	5	19	22a20 #03					-1.3	-1.132	No
	5	19	22a20 #26					-0.972	-0.914	No
	5	19	22a20 #27					-0.49794	-0.47846	No
	5	19	22a20 #28					-0.49149	-0.59361	No
	5	19	22a20 #33					-0.85638	-0.8903	No
	5	19	22a20 #36					-1.0239	-1.1301	No
Fig. 5D / plot	5	19	22a20 #39	0	0	0	0	-0.9712	-0.8922	Yes
	5	19	22a20 #41					-0.70228	-0.73639	No
	5	19	22a20 #47					-1.8491	-1.5539	No
	5	19	22a20 #48					-0.4655		No
	5	19	22a20 #49					-0.545	-0.6098	No
	5	19	22a20 #50							No
	5	21	22a20 #04					-1.0058	-1.0446	No
Fig. 5D / plot	5	21	22a20 #30	0.71634	0.74831	0.255744	0.431023	-0.82725	-0.84182	Yes
Fig. 5D / plot	5	21	22a20 #31	0	0.07877	0	0.075598	-1.2684	-1.2971	Yes
	4	20	22a28 #21					-0.83049	-0.89692	No
	3	10	22a31 #39					-0.8272	-0.81582	No
	4	10	22b01 #31					-0.6391	-0.75749	No
	5	10	22b02 #01					-1.6807	-1.4448	No
	5	10	22b02 #02					-0.56122	-0.50935	No
	5	10	22b02 #11					-0.9291	-0.8968	No
	6	10	22b03 #10					-0.8986		No
	6	10	22b03 #12					-0.5675		No
	6	10	22b03 #18					-0.84343	-0.75101	No
	6	10	22b03 #23					-1.16789	-0.98313	No
