# Supplementary material for: Improved ANAP incorporation and VCF analysis reveal details of P2X7 current facilitation and a limited conformational interplay between ATP binding and the intracellular ballast domain
Source: eLife journal article supplement (doi:10.7554/elife.82479), 2023-01-04
Supplement: fig5-figsupp3-data1 [file VCFdata_DeltaCaM.xlsx]

## Sheet: Sheet1
	P2X7(I541T, S552C, V559G)
				> 500 nm [ΔF/F%]		430-490 nm [ΔF/F%]		Current [µA]
Also used in	Expression time [days]	Oocyte batch	Recording	1st Application	2nd Application	1st Application	2nd Application	1st Application	2nd Application	inclusion criteria for analysis are met
	5	F	l23 #07							No
	4	F	l22 #19					no current		No
	4	G	l22 #22					-1.1611		No
	4	G	l22 #24					-2.375	-1.86	No
	3	F	l21 #06					-1.44222	-1.32397	No
	4	E	l15 #17					-1.8036		No
	3	E	l14 #43					-0.9688	-1.3801	No
	4	D	l08 #12					-0.3892	-0.5433	No
Fig.5-Fig.Suppl.3	4	D	l08 #13					-1.6172	-1.6509	Yes
	3	D	l07 #09					-0.5661	-0.5126	No
	3	D	l07 #10					-1.0045	-1.0237	Yes
	3	D	l07 #11					-0.8892	-0.9751	Yes
	P2X7(F11*, I541T, S552C, V559G)
				> 500 nm [ΔF/F%]		430-490 nm [ΔF/F%]		Current [µA]
Also used in	Expression time [days]	Oocyte batch	Recording	1st Application	2nd Application	1st Application	2nd Application	1st Application	2nd Application	inclusion criteria for analysis are met
	3	E	l14 #32	no F				-1.3441	-1.2279	Yes
Fig.5-Fig.Suppl.3	3	E	l14 #38	0.164624	0.25653	0.136328	0.326161	-1.8281	-1.7546	Yes
	3	E	l14 #39					-1.0558	-1.1858	No
	P2X7(S124*, I541T, S552C, V559G)
				> 500 nm [ΔF/F%]		430-490 nm [ΔF/F%]		Current [µA]
Also used in	Expression time [days]	Oocyte batch	Recording	1st Application	2nd Application	1st Application	2nd Application	1st Application	2nd Application	inclusion criteria for analysis are met
	3	E	l14 #22	-0.904456	-1.28464	3.08408	2.75014	-1.1724	-1.2376	No
	3	E	l14 #23	-1.17623	-1.26561	1.59222	2.08644	-1.499	-1.564	No
Fig.5-Fig.Suppl.3	3	E	l14 #24	-0.756937	-0.844075	1.74997	1.90982	-0.9652	-1.0368	Yes
	P2X7(K127*, I541T, S552C, V559G)
				> 500 nm [ΔF/F%]		430-490 nm [ΔF/F%]		Current [µA]
Also used in	Expression time [days]	Oocyte batch	Recording	1st Application	2nd Application	1st Application	2nd Application	1st Application	2nd Application	inclusion criteria for analysis are met
	4	E	l15 #01	-7.30194	-7.38384	-2.74309	-2.85997	-1.1156	-1.1388	Yes
	4	E	l15 #16					-0.712		No
	3	E	l14 #11					-0.949		No
	3	E	l14 #26					-1.2781	-1.4221	No
	3	E	l14 #27	-3.11438	-3.41905	-1.3639	-1.4476	-1.0491	-1.1099	No
Fig.5-Fig.Suppl.3	3	E	l14 #28	-3.72349	-4.13041	-2.43512	-2.66095	-2.1247	-2.2206	Yes
	3	E	l14 #29	-4.96282	-5.06943	-1.96929	-1.97511	-1.3378	-1.403	Yes
	3	E	l14 #41							No
	P2X7(D423*, I541T, S552C, V559G)
				> 500 nm [ΔF/F%]		430-490 nm [ΔF/F%]		Current [µA]
Also used in	Expression time [days]	Oocyte batch	Recording	1st Application	2nd Application	1st Application	2nd Application	1st Application	2nd Application	inclusion criteria for analysis are met
Fig.5-Fig.Suppl.3	6	G	l24 #35	no F				-0.79481	-0.94429	Yes
	6	G	l24 #37	no F				-0.42167	-0.41522	Yes
	4	G	l22 #08					no current		No
	4	G	l22 #35					-0.10383		No
	3	G	l21 #11					no current		No
	3	E	l14 #06					-1.3231	-1.3265	No
	3	E	l14 #12					-1.1304	-0.8468	No
	3	E	l14 #35	no F				-2.4133	-2.4558	Yes
	3	E	l14 #37	no F				-1.7597	-1.8263	Yes
	P2X7(A564*, I541T, S552C, V559G)
				> 500 nm [ΔF/F%]		430-490 nm [ΔF/F%]		Current [µA]
Also used in	Expression time [days]	Oocyte batch	Recording	1st Application	2nd Application	1st Application	2nd Application	1st Application	2nd Application	inclusion criteria for analysis are met
Fig.5-Fig.Suppl.3	6	G	l24 #36	0.235864	0.154657	0.108697	0.162478	-1.69173	-1.75297	Yes
	4	F	l22 #25					no current		No
	4	G	l22 #29					no current		No
	3	F	l21 #07					-0.2433		No
	3	G	l21 #08	no F				-1.07984	-1.11071	Yes
	3	G	l21 #09					-0.37956	-0.09403	No
	3	F	l21 #10					no current		No
	4	E	l15 #28	0.337291	0.103288	0.0777655	0.125287	-0.7218	-0.7604	No
	3	E	l14 #01						-1.1935	No
	3	E	l14 #02					-1.2003	-1.3027	No
	3	E	l14 #03					-1.8471	-1.972	No
	3	E	l14 #04	0.508957	0.489285	0.148105	0.137285	-1.7905	-1.9216	No
	3	E	l14 #05	no F				-1.2363	-1.1959	Yes
	3	E	l14 #34					-0.9567	-0.72988	No
	3	E	l14 #36	0.498083	0.994101	0.0844187	0.139062	-0.7481	-0.7636	No
