# Supplementary material for: Improved ANAP incorporation and VCF analysis reveal details of P2X7 current facilitation and a limited conformational interplay between ATP binding and the intracellular ballast domain
Source: eLife journal article supplement (doi:10.7554/elife.82479), 2023-01-04
Supplement: fig6-figsupp1-data2 [file Emission_spectra.xlsx]

## Sheet: Sheet0
Application: Tecan i-control				Tecan i-control , 1.11.1.0
Device: infinite 200Pro				Serial number: 1303000586				Serial number of connected stacker:
Firmware: V_3.40_01/15_Infinite (Dec 23 2014/12.45.11)				MAI, V_3.40_01/15_Infinite (Dec 23 2014/12.45.11)
Date:	19.05.2021
Time:	22:17:00
System				PLATTENLESER-PC
User				Plattenleser-PC\Plattenleser
Plate				Thermo Fisher Scientific-Nunclon 96 Flat Bottom Black Polystyrene Cat. No.: 152036/152037/165305 [NUN96fb_OpticalBottom.pdfx]
Plate-ID (Stacker)
Label: may21
Mode				Fluorescence Top Reading
Emission Wavelength Start				420	nm
Emission Wavelength End				590	nm
Emission Wavelength Step Size				2	nm
Emission Scan Number				86
Excitation Wavelength				360	nm
Bandwidth (Em)				280...850: 20 nm
Bandwidth (Ex) (Range 1)				230...315: 5 nm
Bandwidth (Ex) (Range 2)				316...850: 10 nm
Gain				125	Calculated From: A1 (100%)
Number of Flashes				50
Integration Time				20	µs
Lag Time				0	µs
Settle Time				0	ms
Z-Position (Calculated From: A1)				16962	µm
Part of Plate				A1-H3; A10-H12
Start Time:	19.05.2021 22:19:22
	Temperature: 22.9 °C
Wavel.	420	422	424	426	428	430	432	434	436	438	440	442	444	446	448	450	452	454	456	458	460	462	464	466	468	470	472	474	476	478	480	482	484	486	488	490	492	494	496	498	500	502	504	506	508	510	512	514	516
A1	15811	16047	16153	16369	16668	17049	17357	17785	18290	18866	19377	20255	21011	22188	23277	24201	25442	26735	27851	28981	30538	32210	33512	34864	36180	37494	38865	40242	41391	42343	43206	43998	44491	45096	45045	45070	45300	45200	44902	44600	43492	43245	42459	41720	40476	39202	38222	37095	36138
A2	15985	16102	16188	16420	16821	16929	17197	17625	18071	18703	18994	20079	20464	21595	22421	23546	24518	25381	26721	27648	29422	30807	31698	33069	34511	35568	36605	37821	38826	39804	40503	41415	41782	42234	42439	42449	42499	42464	42156	41927	40814	40450	39776	39114	37780	36984	35728	34814	33704
A3	15716	15760	15930	16144	16303	16598	16988	17141	17597	18182	18378	19386	19818	20859	21700	22644	23546	24600	25505	26586	28002	29273	30348	31598	32678	33626	34890	35947	36894	37904	38551	39242	39575	39995	40006	40285	40134	40221	39905	39359	38489	38487	37488	36917	36022	34924	34091	32806	32105
A10	16934	17185	17170	17425	17732	18092	18335	18693	19150	19507	20010	21161	21552	22655	23528	24601	25739	26696	27879	29013	30672	31924	33170	34521	35743	36913	38094	39350	40368	41502	42284	42936	43272	43917	43963	44167	44227	44069	43780	43385	42327	42148	41280	40385	39277	38270	37417	36091	35126
A11	16444	16572	16744	16961	17100	17418	17730	18155	18578	19015	19467	20523	20867	21910	22841	23724	24777	25766	26907	27875	29631	30783	31888	33305	34397	35411	36521	37995	38893	39761	40326	41123	41482	42084	42119	42157	42223	41897	41719	41320	40333	40231	39358	38605	37547	36470	35353	34518	33444
A12	16958	17149	17365	17427	17858	18101	18447	18781	19458	19872	20324	21417	22048	22939	23952	25232	26241	27203	28629	29599	31363	32743	33885	35413	36571	37964	38994	40356	41584	42485	43257	44049	44509	45009	45477	45325	45415	45242	44858	44486	43690	43361	42270	41742	40458	39319	38650	37118	36166
B1	15726	16020	16075	16182	16312	16565	16807	17203	17552	17940	18346	18911	19655	20519	21159	22003	22814	23897	24880	25703	26695	28106	28960	30122	31268	32158	33119	34232	34955	35831	36498	37190	37500	37779	37974	38011	38102	38112	37459	37150	36506	36211	35584	34948	33916	33117	32040	30977	30158
B2	16274	16537	16706	16897	17031	17441	17816	18053	18590	19218	19554	20608	20981	22091	22932	24037	25186	26087	27206	28323	30120	31381	32614	33989	35178	36340	37533	39082	39833	40860	41503	42417	42881	43316	43620	43691	43635	43525	43413	42841	42085	41624	40753	40180	38774	37969	37005	35811	34897
B3	15588	15618	15740	15906	16095	16401	16600	16874	17357	17809	17951	18853	19280	20156	20930	21800	22616	23431	24649	25292	26876	27925	28807	30003	31156	32049	32988	34002	35031	35719	36477	37001	37601	37837	37904	38026	38178	37943	37597	37109	36533	36262	35404	34898	33869	32878	32221	31127	30228
B10	16059	16117	16247	16447	16561	16879	17040	17310	17632	18184	18498	19134	19689	20514	21117	22006	22791	23719	24602	25579	26477	27465	28559	29635	30579	31509	32471	33355	34237	34782	35466	35901	36544	36959	36912	36988	36990	36769	36430	36255	35339	35250	34173	33917	32865	31933	31202	30099	29326
B11	16183	16337	16522	16677	16798	17210	17401	17675	18264	18646	19031	19906	20305	21441	22061	23120	23985	24968	26426	27262	28707	29560	30710	32068	33030	34278	35357	36563	37511	38281	39067	39513	40078	40420	40764	40595	40736	40807	40388	39927	39240	38760	38144	37608	36360	35330	34533	33556	32196
B12	16824	16960	17044	17149	17432	17706	17989	18233	18777	19080	19362	20285	20809	21539	22277	23217	23978	24880	26044	27041	28321	29152	30106	31278	32348	33498	34353	35484	36319	37106	37738	38515	38685	38929	39247	39358	39115	38907	38783	38364	37862	37230	36539	35968	34883	34022	33338	32096	30925
C1	15998	16078	16315	16500	16698	17153	17458	17970	18419	19022	19529	20456	21338	22517	23514	24620	25642	27036	28300	29570	31120	32694	33861	35511	37040	37997	39548	41037	42194	43293	44003	44976	45456	46073	46042	46324	46440	46497	45995	45820	44865	44436	43381	42646	41535	40441	39329	38147	36946
C2	15550	15650	15782	16083	16301	16595	16954	17166	17757	18223	18608	19664	20178	21219	22021	23146	24226	25171	26384	27439	29180	30316	31629	32981	34448	35381	36499	37875	39058	39802	40650	41508	41902	42556	42723	42805	42939	42791	42297	42158	41208	40887	40197	39585	38370	37386	36494	35232	34204
C3	16174	16323	16521	16731	17065	17460	17840	18356	18746	19444	19984	20988	21849	23010	24342	25352	26453	27901	29310	30503	32102	33898	35266	36845	38406	39833	41237	42620	43883	44991	46174	46732	47476	48022	48251	48341	48540	48419	48075	47867	47028	46580	45533	44868	43548	42559	41292	40020	38734
C10	16140	16198	16364	16476	16848	17183	17407	17869	18407	18799	19217	20303	20884	21876	22719	23898	24940	25978	27287	28644	29865	30988	32143	33650	34950	36101	37217	38717	39665	40642	41294	42011	42639	42834	43223	43374	43350	43218	42981	42769	41456	41644	40646	39951	38701	37698	36385	35497	34618
C11	16158	16327	16468	16666	16936	17342	17810	18170	18693	19171	19655	20966	21447	22631	23538	24972	26047	27138	28924	30134	31591	32942	34211	35831	37040	38570	39761	41420	42364	43304	44541	44894	45650	46258	46521	46710	46700	46672	46219	46044	44672	44573	43785	42923	41811	40767	39441	38376	37217
C12	16573	16827	16949	17093	17246	17468	17819	18051	18440	18849	19083	20126	20496	21260	21902	22839	23688	24596	25464	26381	27746	28639	29702	30875	31941	32796	33786	34739	35585	36252	36831	37482	37997	38176	38292	38079	38517	38192	38023	37799	36930	36739	35720	35290	34306	33196	32452	31480	30399
D1	15647	15782	15910	16024	16282	16577	16715	17006	17571	17859	18169	19158	19574	20447	21029	22033	22945	23839	25135	25914	27219	28175	29355	30491	31529	32669	33619	34893	35608	36486	36918	37841	38265	38396	38770	38899	38958	38813	38486	37988	37457	37060	36370	35679	34754	33884	33105	31828	30826
D2	16835	16857	16924	17318	17397	17819	17937	18565	18823	19328	19887	20822	21328	22394	23298	24338	25351	26616	27691	28746	30531	31868	32988	34395	35740	37048	38145	39268	40560	41268	42187	42773	43502	43844	44295	44134	44628	44184	43689	43802	42525	42511	41510	40681	39625	38407	37158	36394	35384
D3	15375	15441	15535	15753	16101	16374	16644	16914	17340	17877	18268	19076	19673	20659	21565	22491	23528	24665	25701	26813	27963	29312	30380	31776	33010	34156	35146	36418	37342	38190	39083	39675	40205	40619	40809	41023	40890	40880	40511	40290	39461	39326	38463	37884	36602	35760	35033	33846	32899
D10	15971	16007	16137	16246	16425	16525	16708	16933	17309	17528	17728	18451	18821	19373	20008	20820	21494	21974	23113	23783	24765	25471	26318	27083	27899	28982	29640	30549	31053	31637	32176	32675	32981	33261	33223	33241	33205	33131	32825	32445	31585	31566	30897	30305	29426	28861	28104	27105	26252
D11	16195	16317	16479	16603	16925	17234	17553	17855	18445	18820	19191	20281	20859	21899	22739	23822	24926	25803	27162	28418	29659	30764	32239	33318	34596	36029	36958	38215	39225	40168	41072	41497	42000	42630	42776	42880	42966	42893	42495	42072	41376	41148	40106	39415	38460	37233	36433	35170	34135
D12	16140	16281	16481	16547	16709	17046	17348	17723	18047	18471	18918	19568	20249	21161	21841	22698	23717	24631	25754	26664	27687	29061	30083	31150	32443	33214	34183	35314	36103	37171	37759	38307	38540	39017	39018	39197	39355	39066	38670	38553	37642	37432	36528	36024	34952	34059	33312	32252	31277
E1	15977	16127	16311	16370	16654	16849	17253	17458	17968	18280	18767	19747	20129	21050	21843	22980	23809	24646	26065	27242	28341	29431	30485	31973	32931	34289	35207	36461	37324	38146	38993	39564	40227	40586	40871	40952	41143	40906	40557	40203	39417	39176	38307	37743	36603	35636	34883	33696	32621
E2	15979	16054	16293	16565	16825	17130	17595	18046	18603	19174	19609	20898	21542	22767	23912	25067	26261	27475	28969	30184	32084	33629	35029	36732	38060	39553	40934	42466	43610	44925	45758	46657	47252	47781	48198	47964	48478	48287	48122	47695	46471	46441	45318	44607	43394	42127	40979	40032	38508
E3	15574	15714	15738	16051	16254	16515	16818	17265	17666	18154	18482	19544	19964	21000	21787	22932	24035	24941	26167	27196	28867	30048	31170	32536	33777	34798	35965	37173	38196	39106	39894	40531	41240	41581	41915	41932	42051	41932	41500	41412	40379	40374	39188	38612	37450	36487	35530	34392	33512
E10	16255	16363	16469	16723	16903	17113	17555	17966	18293	18822	19077	20105	20652	21596	22396	23436	24357	25279	26700	27720	29270	30154	31253	32622	33811	35069	36137	37434	38368	39278	39775	40547	40938	41564	41538	41745	41890	41679	41308	41189	40238	39833	39055	38567	37424	36311	35597	34309	33217
E11	16691	16789	17011	17242	17570	17735	17999	18574	19096	19641	20070	21264	21741	22892	23806	25023	26119	27058	28616	29469	31500	32830	33977	35410	36797	38112	39508	40667	41663	43028	43564	44458	45013	45528	45644	45756	45825	45697	45451	45317	44136	43893	42850	42275	41086	39927	38752	37738	36625
E12	16153	16283	16387	16510	16731	16949	17157	17474	17820	18182	18448	19320	19748	20518	21323	21999	22855	23534	24565	25502	26786	27730	28614	29722	30824	31506	32525	33395	34204	35108	35676	36167	36469	36822	36917	36962	36982	36931	36393	36148	35353	35275	34477	33829	32953	31982	31341	30307	29345
F1	16723	17038	17319	17644	18064	18581	19101	19813	20556	21406	22089	24077	24849	26545	28174	30066	31820	33324	35933	38008	40371	42245	44279	46733	48741	51263	53121	55617	57197	58862	60086	61584	62737	63470	64111	64608	64848	64940	64282	64088	63210	62492	61508	60560	59165	57616	55870	54449	52584
F2	16457	16637	17035	17441	17989	18576	19236	20022	20864	21962	22626	24954	25958	28024	29797	32199	34240	36110	38651	40746	44142	46472	48852	51830	54294	56491	59031	61399	63672	OVER	OVER	OVER	OVER	OVER	OVER	OVER	OVER	OVER	OVER	OVER	OVER	OVER	69090	68166	66498	64806	62974	61235	59403
F3	15881	16119	16281	16599	16897	17191	17805	18487	19015	19800	20240	21403	22637	23980	25347	26661	28177	29777	31398	32948	34707	36719	38333	40344	42117	43612	45585	47175	48518	50139	51410	52095	53086	53910	54352	54532	54914	54856	54562	54103	53414	52981	51922	50984	49825	48346	47335	45824	44348
F10	16249	16484	16637	16868	17198	17642	18076	18547	19096	19711	20385	21782	22430	23818	24958	26409	27848	29066	30743	32073	34522	35992	37651	39472	40937	42609	44087	45846	47271	48372	49752	50912	51447	52150	52724	52812	53191	53257	52780	52388	51437	50974	50225	49281	48180	46796	45533	44138	42747
F11	16465	16658	16749	16987	17420	17754	18122	18462	19125	19740	19925	21414	22079	23105	24170	25467	26816	27934	29378	30432	32691	33967	35268	37132	38544	39848	41493	42977	44502	45189	46254	47094	47761	48254	48658	48870	49126	49091	48630	48396	47398	47111	46255	45530	44116	42853	42171	40852	39652
F12	16735	16844	17169	17521	17884	18230	18791	19407	20198	21000	21644	23219	24085	25682	27073	28793	30371	32136	34156	35870	38259	39886	41596	44082	45627	47809	49461	51706	53339	54314	56104	57226	58297	58740	59458	59576	59704	59904	59331	59203	58094	57641	56409	55847	54506	52933	51596	50165	48124
G1	20097	20699	21322	22468	23536	25260	26853	29202	31229	33951	36064	40095	44330	49307	53993	58821	63764	OVER	OVER	OVER	OVER	OVER	OVER	OVER	OVER	OVER	OVER	OVER	OVER	OVER	OVER	OVER	OVER	OVER	OVER	OVER	OVER	OVER	OVER	OVER	OVER	OVER	OVER	OVER	OVER	OVER	OVER	OVER	OVER
G2	19726	20276	21351	22333	23750	25241	26880	29016	31624	33885	35829	41829	44186	49650	53974	60158	OVER	OVER	OVER	OVER	OVER	OVER	OVER	OVER	OVER	OVER	OVER	OVER	OVER	OVER	OVER	OVER	OVER	OVER	OVER	OVER	OVER	OVER	OVER	OVER	OVER	OVER	OVER	OVER	OVER	OVER	OVER	OVER	OVER
G3	19513	19977	20691	21661	23200	24672	26541	28409	31119	33468	35436	40849	43599	48834	53633	59334	64755	OVER	OVER	OVER	OVER	OVER	OVER	OVER	OVER	OVER	OVER	OVER	OVER	OVER	OVER	OVER	OVER	OVER	OVER	OVER	OVER	OVER	OVER	OVER	OVER	OVER	OVER	OVER	OVER	OVER	OVER	OVER	OVER
G10	17180	17530	17957	18502	19165	19850	20780	21753	23060	24220	25354	28223	29786	32638	35184	38447	41290	44045	47951	51024	56241	60136	63820	OVER	OVER	OVER	OVER	OVER	OVER	OVER	OVER	OVER	OVER	OVER	OVER	OVER	OVER	OVER	OVER	OVER	OVER	OVER	OVER	OVER	OVER	OVER	OVER	OVER	OVER
G11	17513	17636	18202	18782	19422	20600	21483	22869	24120	25708	26971	29606	31952	35467	38227	41354	44674	48630	52440	56354	60853	OVER	OVER	OVER	OVER	OVER	OVER	OVER	OVER	OVER	OVER	OVER	OVER	OVER	OVER	OVER	OVER	OVER	OVER	OVER	OVER	OVER	OVER	OVER	OVER	OVER	OVER	OVER	OVER
G12	17781	18177	18720	19299	20046	21108	22008	23285	24978	26509	27744	31526	33095	36763	39867	43662	47159	50518	55975	60065	OVER	OVER	OVER	OVER	OVER	OVER	OVER	OVER	OVER	OVER	OVER	OVER	OVER	OVER	OVER	OVER	OVER	OVER	OVER	OVER	OVER	OVER	OVER	OVER	OVER	OVER	OVER	OVER	OVER
H1	16666	16813	16828	16858	16857	16763	16614	16587	16361	16365	16264	15980	15868	15629	15373	15172	14946	14714	14501	14350	13935	13650	13460	13105	12906	12693	12339	12034	11750	11519	11268	10975	10732	10538	10046	9870	9719	9498	9240	9012	8624	8565	8229	8103	7886	7665	7439	7256	7068
H2	16700	16683	16873	16928	16887	16621	16551	16573	16408	16322	16359	16012	15926	15616	15387	15167	14910	14777	14478	14194	13977	13746	13463	13242	12904	12657	12323	12125	11750	11497	11295	11013	10748	10499	10075	9984	9825	9421	9252	8963	8627	8564	8318	8157	7843	7637	7531	7279	7103
H3	17153	17043	17127	17201	17123	17082	17082	16850	16842	16780	16708	16476	16320	16077	15834	15610	15417	15226	14948	14736	14380	14173	13947	13660	13475	13126	12862	12542	12197	11974	11667	11465	11144	10975	10451	10258	10118	9813	9616	9376	8952	8925	8599	8427	8219	7953	7700	7574	7395
H10	15827	15962	15885	15884	15635	15528	15409	15227	15180	15115	14980	14721	14490	14282	14074	13903	13551	13486	13192	12910	12637	12462	12287	11975	11772	11523	11338	11043	10824	10614	10256	10125	9826	9623	9453	9182	8886	8771	8509	8285	8055	7854	7640	7496	7303	7106	6955	6776	6569
H11	15917	15940	15867	15799	15768	15607	15541	15307	15294	15176	15007	14745	14554	14336	14113	13931	13707	13539	13212	13079	12704	12504	12202	12012	11826	11527	11265	11082	10756	10572	10271	10066	9857	9659	9462	9188	8942	8758	8444	8264	8020	7860	7640	7507	7312	7047	6875	6751	6489
H12	16493	16488	16357	16371	16247	16117	15949	15831	15740	15604	15494	15139	14992	14722	14466	14179	14097	13789	13398	13270	12864	12734	12558	12274	12062	11763	11495	11204	10919	10701	10536	10239	9974	9839	9535	9275	8997	8802	8488	8321	8072	7887	7695	7570	7304	7194	7018	6791	6591
End Time:	19.05.2021 23:48:35
[truncated: 37 more columns]

## Sheet: Tabelle1
nm	ANAP			ANAP + 10 uM Ca2+			ANAP + 100 uM Ca2+			ANAP + 1 mM Ca2+			ANAP + 10 mM Ca2+			ANAP + 100 mM Ca2+			ANAP + 1 M Ca 2+			1 M Ca2+
420	0.385258	0.37411	0.385804	0.365351	0.368172	0.382755	0.367194	0.367603	0.377045	0.363349	0.368445	0.367194	0.36981	0.379729	0.367489	0.369674	0.374588	0.38073	0.390854	0.39843	0.404527	0.360073	0.36212	0.375225
422	0.390968	0.377022	0.390149	0.36667	0.371676	0.385849	0.368513	0.371448	0.382823	0.364168	0.371221	0.370402	0.372267	0.381959	0.370447	0.37502	0.378978	0.38321	0.398817	0.401229	0.413537	0.363144	0.362644	0.375111
424	0.390627	0.380935	0.395063	0.369628	0.375884	0.38776	0.37229	0.374656	0.385599	0.367125	0.374906	0.374952	0.374679	0.387009	0.372813	0.378501	0.381049	0.390604	0.408531	0.414105	0.42589	0.361392	0.360983	0.372131
426	0.396428	0.385872	0.396474	0.374178	0.379411	0.390149	0.374838	0.379161	0.388875	0.369605	0.377727	0.376453	0.380457	0.392265	0.375611	0.383756	0.386463	0.398612	0.42093	0.427301	0.439063	0.36137	0.359436	0.372449
428	0.403413	0.389034	0.406279	0.376772	0.382164	0.396587	0.383301	0.385303	0.392356	0.373678	0.385053	0.380139	0.384552	0.399727	0.380639	0.391264	0.396314	0.406871	0.436014	0.441861	0.456057	0.355705	0.358731	0.369628
430	0.411603	0.396269	0.411808	0.384006	0.391537	0.402821	0.390923	0.39454	0.397406	0.375953	0.392083	0.387806	0.38933	0.403481	0.385599	0.401365	0.403913	0.414742	0.451598	0.468661	0.480218	0.35327	0.355068	0.36667
432	0.417131	0.403367	0.419679	0.387669	0.395882	0.409259	0.396019	0.405187	0.405392	0.380116	0.39934	0.394676	0.399386	0.409487	0.390331	0.411239	0.412285	0.427505	0.472756	0.48875	0.500694	0.350563	0.353566	0.362848
434	0.425276	0.413036	0.427278	0.393812	0.402116	0.414811	0.406529	0.413377	0.41067	0.385235	0.406211	0.403208	0.408736	0.422569	0.397543	0.421954	0.42002	0.44152	0.494893	0.520282	0.529746	0.346422	0.348243	0.360164
436	0.435673	0.42266	0.44268	0.401138	0.415516	0.427187	0.418769	0.425276	0.41952	0.393789	0.419634	0.410579	0.416176	0.434444	0.405415	0.434444	0.435104	0.459515	0.524627	0.548743	0.568263	0.345353	0.347947	0.358094
438	0.443795	0.432602	0.452099	0.413696	0.424207	0.43408	0.427687	0.436151	0.428825	0.398771	0.428165	0.420225	0.428211	0.446843	0.41365	0.448436	0.449096	0.477761	0.551018	0.584871	0.603094	0.343874	0.345262	0.354999
440	0.455238	0.442885	0.462382	0.420839	0.432966	0.440496	0.437197	0.447162	0.434149	0.403322	0.436606	0.430395	0.434012	0.456603	0.419702	0.46377	0.453305	0.492413	0.576817	0.613605	0.631191	0.340803	0.341417	0.352497
442	0.481424	0.466909	0.487248	0.435309	0.452872	0.461495	0.461904	0.476988	0.457877	0.41977	0.461404	0.445183	0.4574	0.483767	0.43954	0.495552	0.48718	0.528245	0.642088	0.673552	0.717234	0.334911	0.335457	0.34442
444	0.49032	0.474736	0.501604	0.447935	0.46195	0.473416	0.475122	0.487931	0.466295	0.428188	0.474554	0.460676	0.469844	0.494619	0.449278	0.510295	0.502309	0.547947	0.677648	0.726925	0.752929	0.329655	0.331111	0.341076
446	0.515413	0.498464	0.521875	0.466705	0.487794	0.490024	0.497691	0.514867	0.483676	0.440746	0.498214	0.481424	0.491321	0.520805	0.466796	0.541872	0.525651	0.584279	0.742532	0.806893	0.836378	0.324923	0.326152	0.334933
448	0.535275	0.519645	0.544921	0.480423	0.5019	0.506814	0.51687	0.535502	0.498282	0.455193	0.517325	0.496895	0.509521	0.541599	0.48511	0.567808	0.549881	0.615925	0.800455	0.869685	0.906996	0.320191	0.321078	0.329109
450	0.559686	0.539734	0.574042	0.500648	0.525992	0.528199	0.543692	0.568126	0.5196	0.473666	0.541963	0.516392	0.533182	0.569287	0.500489	0.600819	0.579388	0.655056	0.87469	0.940826	0.993334	0.316301	0.316938	0.32258
452	0.585576	0.56369	0.596997	0.518508	0.545672	0.545512	0.567398	0.592583	0.538915	0.489	0.56708	0.539575	0.554135	0.594221	0.519964	0.633557	0.610078	0.690957	0.93937	1.01636	1.07289	0.308293	0.311842	0.320714
454	0.607348	0.58619	0.618883	0.53962	0.568035	0.566033	0.591014	0.617404	0.559572	0.49992	0.587032	0.560369	0.575111	0.615584	0.535411	0.661267	0.635514	0.731111	1.00205	1.10636	1.14931	0.306814	0.30802	0.313707
456	0.634262	0.612149	0.651325	0.559709	0.601206	0.592515	0.620794	0.658037	0.57932	0.525833	0.61795	0.585917	0.607439	0.651029	0.558867	0.69942	0.668365	0.777067	1.09091	1.19304	1.27346	0.300125	0.30058	0.304812
458	0.660061	0.634171	0.673393	0.581936	0.620225	0.615197	0.651666	0.685565	0.600182	0.541076	0.646525	0.60662	0.630645	0.670436	0.580184	0.729678	0.692344	0.816062	1.16082	1.28208	1.36651	0.293709	0.297554	0.3019
460	0.697805	0.674121	0.713525	0.602366	0.6531	0.644318	0.679445	0.718712	0.631236	0.563417	0.674758	0.629894	0.665908	0.716642	0.609396	0.785394	0.743738	0.870413	1.27951314*	1.38443863*		0.287499	0.289023	0.292663
462	0.726288	0.70033	0.744921	0.624844	0.672506	0.663224	0.704994	0.749448	0.651553	0.579479	0.699898	0.661153	0.68602	0.7469	0.630872	0.818837	0.772768	0.907428	1.36812649*			0.283517	0.284473	0.289705
464	0.754635	0.725469	0.770902	0.649733	0.698669	0.684928	0.731271	0.778319	0.675737	0.598749	0.733455	0.684404	0.711023	0.772995	0.650984	0.856581	0.802366	0.946331	1.45193948*			0.279536	0.277602	0.285701
466	0.785371	0.757707	0.805665	0.674212	0.729564	0.711591	0.765556	0.815175	0.702423	0.616153	0.758003	0.708679	0.742168	0.805597	0.676192	0.898009	0.844773	1.00289				0.272438	0.273279	0.27924
468	0.813173	0.78255	0.83201	0.695689	0.75145	0.735934	0.795131	0.84268	0.726675	0.634717	0.787078	0.738096	0.769219	0.837152	0.701263	0.931339	0.876897	1.03804				0.267819	0.269048	0.274417
470	0.839791	0.805619	0.863702	0.716847	0.779843	0.762098	0.821317	0.877488	0.746127	0.659356	0.819679	0.755636	0.797839	0.867069	0.716779	0.969378	0.906564	1.08768				0.262154	0.262245	0.267615
472	0.866659	0.830872	0.887135	0.738733	0.804391	0.781549	0.846707	0.904584	0.76865	0.674326	0.840814	0.777682	0.822136	0.898828	0.739961	1.003	0.943988	1.12526				0.257946	0.256285	0.261517
474	0.895234	0.864407	0.918121	0.758844	0.831828	0.80728	0.880833	0.942327	0.790331	0.695006	0.869412	0.803413	0.851644	0.925196	0.759754	1.04302	0.97775	1.17634				0.251234	0.252121	0.254897
476	0.918394	0.884837	0.946058	0.77891	0.853396	0.826277	0.9024	0.963804	0.809578	0.706473	0.89239	0.821363	0.872893	0.947856	0.778159	1.07544	1.01244	1.21349				0.246252	0.244705	0.248413
478	0.944193	0.904584	0.966557	0.791309	0.870913	0.844182	0.924627	0.985189	0.824753	0.719759	0.913844	0.84566	0.893596	0.97891	0.798726	1.10049	1.02807	1.23567				0.241474	0.240519	0.243454
480	0.961984	0.917438	0.98412	0.806871	0.888795	0.85856	0.939461	1.01333	0.837925	0.732021	0.93441	0.859038	0.904903	0.991105	0.811648	1.13188	1.0523	1.2764				0.23333	0.233671	0.2397
482	0.976817	0.93557	1.00214	0.816767	0.898942	0.876237	0.955773	1.02136	0.852736	0.743374	0.944079	0.871505	0.922466	1.01144	0.822819	1.15828	1.07141	1.30192				0.230349	0.229007	0.232943
484	0.984461	0.943738	1.0126	0.831396	0.911796	0.880105	0.97006	1.03856	0.864452	0.750336	0.955523	0.876806	0.931362	1.02407	0.829689	1.17045	1.08659	1.32629				0.223547	0.224252	0.226914
486	0.999135	0.957434	1.02398	0.840837	0.919577	0.885656	0.974497	1.05239	0.868525	0.756706	0.969856	0.887658	0.945603	1.03579	0.83772	1.18644	1.0978	1.33637				0.218928	0.219747	0.223843
488	1.00018	0.95823	1.03463	0.839768	0.927403	0.89289	0.983347	1.05838	0.871164	0.755841	0.973177	0.887681	0.945012	1.03843	0.839882	1.1995	1.107	1.3527				0.215061	0.215266	0.216926
490	1.00482	0.959095	1.03117	0.841497	0.923558	0.895416	0.986782	1.06268	0.866318	0.756251	0.975543	0.891753	0.949721	1.04097	0.840905	1.2015	1.11182	1.35539				0.208895	0.209032	0.211011
492	1.00619	0.960596	1.03322	0.841542	0.926766	0.889887	0.986236	1.06245	0.876283	0.755432	0.9775	0.895348	0.95302	1.04254	0.84136	1.21012	1.11764	1.3583				0.202161	0.203435	0.204687
494	1.00259	0.953179	1.02928	0.836515	0.928381	0.885155	0.983233	1.06181	0.868889	0.753748	0.975839	0.888773	0.94822	1.03963	0.8402	1.21163	1.11685	1.36285				0.199545	0.199249	0.20025
496	0.996019	0.94913	1.02054	0.828802	0.918849	0.882334	0.977841	1.05151	0.865044	0.746786	0.966784	0.879763	0.939779	1.03403	0.82796	1.20077	1.10636	1.34981				0.193584	0.192106	0.193107
498	0.987032	0.940052	1.01208	0.824821	0.908361	0.872802	0.973018	1.04753	0.859948	0.738141	0.957161	0.877102	0.937072	1.03099	0.822387	1.19186	1.10104	1.3469				0.188488	0.18801	0.189307
500	0.962962	0.917598	0.993971	0.803981	0.892731	0.861381	0.943146	1.01631	0.840177	0.718576	0.941326	0.856376	0.915436	1.00412	0.8043	1.17022	1.07833	1.32167				0.183256	0.182459	0.183642
502	0.95889	0.915277	0.986486	0.801957	0.881811	0.847003	0.947423	1.01406	0.835832	0.718144	0.936139	0.851598	0.906222	0.998589	0.802525	1.15969	1.0718	1.31136				0.178683	0.178819	0.179434
504	0.939142	0.895416	0.961665	0.777454	0.867797	0.831282	0.924718	0.996132	0.812649	0.702923	0.912433	0.831032	0.888522	0.974861	0.78437	1.14265	1.05233	1.28334				0.173814	0.173814	0.175065
506	0.918781	0.878285	0.949653	0.77163	0.855602	0.818291	0.908907	0.976521	0.802867	0.689455	0.896713	0.819565	0.87742	0.961779	0.769628	1.12117	1.03583	1.27055				0.170538	0.170788	0.172222
508	0.893573	0.854215	0.920441	0.747697	0.82721	0.793607	0.880469	0.951223	0.78048	0.669457	0.874986	0.795177	0.851416	0.934729	0.749699	1.09612	1.00366	1.24004				0.166147	0.166352	0.16617
510	0.870663	0.829712	0.894528	0.726493	0.803777	0.774019	0.85765	0.927471	0.755227	0.656603	0.847071	0.774861	0.826095	0.908361	0.727608	1.06463	0.974929	1.20425				0.161665	0.160323	0.163667
512	0.851257	0.8043	0.879308	0.709862	0.785644	0.758458	0.827778	0.897304	0.738301	0.639381	0.82887	0.757866	0.809851	0.881629	0.713025	1.0359	0.959413	1.17384				0.15823	0.15641	0.159663
514	0.82109	0.785303	0.844455	0.684769	0.763417	0.730201	0.807576	0.873075	0.716187	0.616653	0.800137	0.73375	0.780548	0.85856	0.689501	1.00416	0.929405	1.14128				0.154158	0.153589	0.154499
516	0.799135	0.760869	0.822796	0.667182	0.732476	0.70356	0.787578	0.846707	0.691594	0.597247	0.77659	0.711569	0.755705	0.833239	0.667615	0.972517	0.902104	1.09485				0.149448	0.147628	0.149949
518	0.769901	0.73482	0.790923	0.643681	0.709862	0.683221	0.761665	0.81679	0.663611	0.579388	0.752406	0.682766	0.730247	0.802753	0.645979	0.94549	0.869162	1.06716				0.145171	0.145854	0.145876
520	0.750063	0.715482	0.770925	0.625208	0.689887	0.658082	0.738619	0.79504	0.649892	0.563986	0.729564	0.667637	0.713821	0.78114	0.627551	0.913684	0.850438	1.03169				0.143488	0.14185	0.142987
522	0.703242	0.674212	0.724787	0.58933	0.664452	0.63292	0.693709	0.748356	0.612399	0.526971	0.68759	0.628893	0.669571	0.733318	0.591309	0.863633	0.794494	0.987669				0.139347	0.138301	0.138596
524	0.679377	0.64789	0.696963	0.566739	0.627528	0.602844	0.67064	0.721556	0.588852	0.514026	0.664475	0.601638	0.64748	0.708042	0.571425	0.829394	0.768946	0.944375				0.133136	0.134547	0.132408
526	0.655625	0.623183	0.672938	0.54731	0.605369	0.579343	0.640769	0.692822	0.569128	0.492071	0.635605	0.580457	0.620999	0.680446	0.551701	0.802935	0.739279	0.905631				0.13011	0.129701	0.132886
528	0.623501	0.594335	0.640405	0.523149	0.577864	0.550768	0.612604	0.658446	0.540234	0.46898	0.61026	0.554476	0.594517	0.649482	0.527176	0.761916	0.701695	0.858492				0.126948	0.125082	0.126516
530	0.611284	0.579252	0.626959	0.50695	0.5641	0.541122	0.596997	0.646024	0.530884	0.456899	0.596565	0.540826	0.578933	0.632624	0.511136	0.743601	0.68966	0.840678				0.124923	0.124536	0.124787
532	0.565374	0.537345	0.581709	0.475464	0.523058	0.503947	0.55691	0.602753	0.49471	0.425685	0.550882	0.50447	0.536776	0.589057	0.47692	0.690365	0.640405	0.783028	1.77868274*			0.119964	0.118121	0.118621
534	0.54888	0.522534	0.563622	0.459834	0.511591	0.487248	0.538141	0.581845	0.476601	0.412877	0.535206	0.491616	0.525355	0.571653	0.464703	0.672551	0.622296	0.762894	1.72719827*			0.117802	0.116005	0.117484
536	0.527653	0.50058	0.541463	0.442498	0.493209	0.468911	0.52126	0.554362	0.457741	0.396587	0.511978	0.468616	0.501649	0.552383	0.447571	0.648754	0.601888	0.734183	1.66190422*	1.83967694*		0.113821	0.113707	0.11555
538	0.494756	0.472551	0.509021	0.412695	0.463315	0.438403	0.48759	0.521852	0.431077	0.372722	0.483585	0.44152	0.47064	0.519054	0.421317	0.609373	0.561665	0.688773	1.56647	1.7322	1.85806	0.111182	0.109612	0.110454
540	0.469457	0.44541	0.48056	0.404778	0.439973	0.426391	0.465226	0.507155	0.410465	0.3646	0.466659	0.429667	0.458583	0.491639	0.401274	0.577363	0.534387	0.654465	1.52288	1.68984	1.76515	0.109385	0.108429	0.106996
542	0.445911	0.4263	0.458219	0.370561	0.411808	0.394836	0.433398	0.466045	0.390149	0.334501	0.428688	0.395882	0.421363	0.458446	0.376294	0.54003	0.498806	0.609965	1.40293	1.56485	1.6855	0.103538	0.10281	0.103629
544	0.426527	0.405642	0.434968	0.359914	0.39752	0.378569	0.419292	0.450256	0.372017	0.326448	0.413969	0.381117	0.406711	0.446047	0.361324	0.524673	0.483494	0.587828	1.35948	1.50568	1.60851	0.100398	0.101263	0.1019
546	0.404482	0.383165	0.415402	0.342851	0.381003	0.361665	0.398589	0.427551	0.354476	0.307678	0.394085	0.361119	0.384348	0.425412	0.346559	0.495029	0.460448	0.558685	1.29262	1.42707	1.52663	0.0987146	0.0983733	0.0993516
548	0.383688	0.365078	0.392583	0.325879	0.360005	0.344034	0.384234	0.405028	0.33507	0.294597	0.376294	0.343897	0.366056	0.402025	0.329542	0.474645	0.436651	0.536344	1.23117	1.36633	1.46161	0.0953248	0.0943237	0.0967808
550	0.362052	0.344921	0.371858	0.306063	0.341258	0.323968	0.358981	0.382164	0.319873	0.275532	0.351974	0.326402	0.346036	0.381777	0.311523	0.442612	0.412035	0.497122	1.1623	1.28283	1.37067	0.0918439	0.0916392	0.092936
552	0.342737	0.32713	0.351086	0.290706	0.3196	0.310818	0.337618	0.364441	0.300102	0.264657	0.33821	0.310158	0.330156	0.354749	0.292344	0.415425	0.385076	0.468479	1.1021	1.21649	1.30295	0.0902741	0.0901376	0.0897054
554	0.328905	0.31191	0.336867	0.282448	0.304698	0.296189	0.323626	0.352406	0.287317	0.25542	0.322716	0.299056	0.318667	0.34078	0.279081	0.396041	0.368513	0.447822	1.05681	1.16647	1.24311	0.0881128	0.0868161	0.0872483
556	0.311546	0.297759	0.320919	0.263224	0.29239	0.278489	0.309225	0.325901	0.274121	0.238471	0.302013	0.277716	0.297327	0.324514	0.265704	0.376681	0.349312	0.427756	0.984712	1.09355	1.1735	0.0835172	0.0832897	0.0840178
558	0.297645	0.282607	0.3019	0.25203	0.275828	0.266682	0.291093	0.311637	0.260266	0.228393	0.289137	0.266432	0.283949	0.306313	0.25153	0.361279	0.334092	0.402571	0.941508	1.04725	1.11712	0.0822887	0.0821295	0.082357
560	0.283244	0.269162	0.287317	0.23838	0.264134	0.251826	0.276738	0.295552	0.248004	0.218314	0.275623	0.252531	0.267956	0.293596	0.243044	0.338938	0.315391	0.383278	0.890661	0.986714	1.0607	0.0796951	0.0806962	0.0804232
562	0.265772	0.253805	0.271619	0.225071	0.247321	0.237971	0.259561	0.275509	0.235696	0.205233	0.258446	0.237243	0.254192	0.275896	0.23069	0.318894	0.297372	0.361506	0.837538	0.925765	0.992561	0.0776931	0.0765556	0.0770788
564	0.251348	0.241224	0.260107	0.212103	0.235946	0.226641	0.247958	0.264475	0.223865	0.19595	0.247389	0.226618	0.242748	0.261267	0.217859	0.305927	0.284063	0.341349	0.796656	0.879923	0.945922	0.0749858	0.0747128	0.0745763
566	0.241542	0.230417	0.24243	0.204641	0.224025	0.21547	0.234581	0.25062	0.212922	0.18544	0.232943	0.213468	0.228165	0.250529	0.2048	0.286293	0.271323	0.320578	0.75616	0.830076	0.884496	0.07287	0.071869	0.072961
568	0.224889	0.214196	0.231851	0.193948	0.211125	0.203526	0.220544	0.236446	0.197952	0.175065	0.220544	0.20207	0.214902	0.228848	0.193948	0.268388	0.248641	0.304015	0.707269	0.775862	0.829075	0.0708679	0.0691389	0.0692071
570	0.212968	0.202457	0.218246	0.182414	0.200296	0.192606	0.209419	0.223501	0.187191	0.166534	0.209214	0.193766	0.20339	0.219998	0.18478	0.257627	0.237152	0.286566	0.667046	0.733227	0.786873	0.0676146	0.0672506	0.0685474
572	0.203208	0.19297	0.207189	0.173427	0.187806	0.182528	0.199772	0.211102	0.178819	0.158617	0.198817	0.18271	0.194858	0.207826	0.175907	0.242794	0.225117	0.27196	0.628438	0.698555	0.749084	0.0663633	0.0656126	0.065203
574	0.192492	0.180981	0.195495	0.167512	0.178114	0.174292	0.188261	0.203777	0.168877	0.153248	0.189171	0.17527	0.186145	0.197338	0.165396	0.22928	0.213286	0.256103	0.60248	0.664657	0.703151	0.0647935	0.0634513	0.0642703
576	0.18453	0.172222	0.182846	0.155796	0.170424	0.162712	0.17684	0.188761	0.16121	0.143192	0.178	0.165396	0.174201	0.188534	0.156751	0.215493	0.204072	0.238972	0.559777	0.613992	0.651234	0.0619497	0.062291	0.0614265
578	0.174383	0.166261	0.174474	0.149903	0.162371	0.15757	0.168877	0.182346	0.152065	0.137618	0.171061	0.159345	0.165169	0.178319	0.150358	0.205619	0.194608	0.227847	0.534865	0.584598	0.619224	0.0606529	0.0594472	0.0593107
580	0.161665	0.153862	0.166784	0.139279	0.154453	0.147037	0.15889	0.170333	0.144352	0.128177	0.158708	0.146695	0.156387	0.167558	0.1421	0.194745	0.179047	0.218382	0.493254	0.544284	0.586577	0.0583779	0.0570356	0.0572631
582	0.159481	0.152156	0.159777	0.137004	0.148743	0.143829	0.155204	0.166716	0.140553	0.127198	0.155864	0.143283	0.152269	0.164168	0.137436	0.186486	0.178068	0.208895	0.473826	0.530315	0.563622	0.0558981	0.0556023	0.0567626
584	0.150267	0.143943	0.149949	0.128199	0.138869	0.135161	0.146764	0.157434	0.133341	0.118007	0.144102	0.135661	0.142896	0.153543	0.127653	0.174224	0.163008	0.193926	0.444455	0.495348	0.521442	0.0538733	0.0542828	0.0546241
586	0.139643	0.135206	0.141645	0.122443	0.13052	0.125992	0.135957	0.145035	0.124309	0.112024	0.13689	0.126106	0.134547	0.144261	0.121852	0.164873	0.154931	0.181322	0.413309	0.462018	0.488727	0.0535775	0.0512115	0.0520305
588	0.132158	0.126061	0.134183	0.115527	0.12415	0.122011	0.129428	0.138005	0.118007	0.104516	0.128814	0.120191	0.128336	0.135639	0.115596	0.154544	0.146081	0.172677	0.39686	0.430122	0.459993	0.05153	0.0501877	0.0501422
590	0.127335	0.120237	0.128063	0.109521	0.118849	0.114958	0.123285	0.132181	0.113343	0.100216	0.123581	0.115004	0.120487	0.129769	0.111614	0.14715	0.138073	0.165487	0.376794	0.410647	0.437106	0.0490502	0.0489592	0.0493004
