# Supplementary material for: Improved ANAP incorporation and VCF analysis reveal details of P2X7 current facilitation and a limited conformational interplay between ATP binding and the intracellular ballast domain
Source: eLife journal article supplement (doi:10.7554/elife.82479), 2023-01-04
Supplement: fig6-figsupp2-data1 [file VCFdata_FRET.xlsx]

## Sheet: Sheet1
		P2X7(Y595*)_CaM_M13_mNeonGreen
Expression time [days]	Recording	mNeonGreen - ΔF/F [%]	L-Anap - ΔF/F [%]	current - ΔI [μA]
6	e13 #11	2.17941	-3.27769	-1.78275
6	e13 #13	2.54284	-0.403198	-1.8392
4	e04 #18	1.78399	-1.14022	-0.9664
4	e04 #19	0.759315	-1.05618	-1.0231
5	e05 #01	2.17383	-1.09982	-1.91029
5	e05 #22	1.52039	-3.33604	-1.9614
7	e07 #41	2.91916	1.15669	-1.9273
		P2X7(Y595*)_CaM_M13
Expression time [days]	Recording	mNeonGreen - ΔF/F [%]	L-Anap - ΔF/F [%]	current - ΔI [μA]
7	e14 #02	-0.642471	-3.45963	-2.0953
7	e14 #03	-1.94199	-3.58929	-1.7003
7	e14 #21	-3.12707	-4.7268	-1.5312
7	e14 #23	-0.58468	-2.89008	-1.843
		P2X7(Y595*)
Expression time [days]	Recording	mNeonGreen - ΔF/F [%]	L-Anap - ΔF/F [%]	current - ΔI [μA]
4	e25 #04	0	-1.64334	-1.6644
4	e25# 05	0	-0.447946	-1.79351
4	e25 #06	0	-0.804937	-1.4483
		P2X7_CaM_M13_mNeonGreen
Expression time [days]	Recording	mNeonGreen - ΔF/F [%]	L-Anap - ΔF/F [%]	current - ΔI [μA]
5	e12 #21	0.504466	0.633929	-5.6822
5	e12 #28	0.471223	0.520896	-3.64813
5	e12 #29	0.469632	0.176208	-4.16224
7	e14 #06	-0.641841	-0.688961	-0.55635
7	e14 #07	-1.2013	-1.26807	-0.81262
7	e14 #16	-0.735051	-0.869618	-0.86127
7	e14 #17	-1.28946	-1.22528	-0.6407
		P2X7_CaM_M13
Expression time [days]	Recording	mNeonGreen - ΔF/F [%]	L-Anap - ΔF/F [%]	current - ΔI [μA]
5	e12 #31	0.157243	0.127999	-4.824
5	e12 #32	0.294686	0.264841	-2.99786
7	e14 #04	-0.619482	-0.371641	-0.6293
7	e14 #05	-1.17187	-1.39773	-0.5401
7	e14 #15	-0.673753	-1.17442	-0.92943
7	e14 #18	-1.07146	-0.923457	-0.5645
5	e05 #36	-0.0957184	-0.23831	-0.8175
5	e05 #37	-0.216649	-0.623179	-0.59203
4	e04 #21	-0.408319	-1.10261	-0.4087
		P2X7
Expression time [days]	Recording	mNeonGreen - ΔF/F [%]	L-Anap - ΔF/F [%]	current - ΔI [μA]
3	e20 #00	-0.427098	-1.27439	-1.3426
3	e20 #01	-0.364419	-1.63955	-1.448
3	e20 #11	-0.458248	-0.222532	-1.44718
3	e20 #15	-2.79945	-3.67203	-1.7515
7	e14 #24	-1.03653	-1.83515	-1.9012
2	e05 #06	-0.360198	-0.6799	-1.4449
2	e19 #05	-2.08449	-1.35586	-0.6971
2	e05 #14	-0.239439	-1.33994	-2.94743
