# Supplementary material for: Improved ANAP incorporation and VCF analysis reveal details of P2X7 current facilitation and a limited conformational interplay between ATP binding and the intracellular ballast domain
Source: eLife journal article supplement (doi:10.7554/elife.82479), 2023-01-04
Supplement: fig6-figsupp3-data1 [file VCFdata_FRET-CaM.xlsx]

## Sheet: Sheet1
		P2X7(A3*) + CaM-mNeonGreen
Expression time [days]	Recording	mNeonGreen - ΔF/F [%]	L-Anap - ΔF/F [%]	current - ΔI [μA]
5	e26-17	3.00894	1.05459	-0.9924
4	e25-23	3.07208	1.65055	-1.30778
4	e04-02	1.1589	-0.604152	-1.2587
5	e05-31	1.11371	-3.69882	-4.20772
		P2X7(Q455*) + CaM-mNeonGreen
Expression time [days]	Recording	mNeonGreen - ΔF/F [%]	L-Anap - ΔF/F [%]	current - ΔI [μA]
4	e04-05	0.969407	-1.49912	-1.4804
4	e04-22	0.0508031	-1.586	-1.6948
5	e05-32	0.83483	-3.62882	-7.3035
6	e06-21	0.921445	-5.60123	-3.417
7	e07-39	2.45322	-2.90821	-4.208
7	e07-40	3.24846	-0.0506613	-2.2172
		P2X7(L523*) + CaM-mNeonGreen
Expression time [days]	Recording	mNeonGreen - ΔF/F [%]	L-Anap - ΔF/F [%]	current - ΔI [μA]
6	e27-16	0.200654	0.237417	-1.8834
6	e27-24	2.00642	0.304123	-0.7562
6	e27-25	1.8035	0.31523	-1.9971
		P2X7(L527*) + CaM-mNeonGreen
Expression time [days]	Recording	mNeonGreen - ΔF/F [%]	L-Anap - ΔF/F [%]	current - ΔI [μA]
6	e27-28	2.73214	0.197227	-2.8205
6	e27-29	3.74476	0.833491	-2.8253
4	e25-17	1.50146	-1.25769	-1.3151
4	e25-18	0.33011	-3.21217	-1.513
		Wt P2X7 + CaM-mNeonGreen
Expression time [days]	Recording	mNeonGreen - ΔF/F [%]	L-Anap - ΔF/F [%]	current - ΔI [μA]
4	e25-07	1.13102	-1.16842	-2.2251
4	e25-08	1.26085	-0.61966	-1.6158
4	e25-09	1.8428	-0.167988	-1.46478
4	e25-10	1.70535	-1.13889	-2.4332
5	e05-26	2.61819	-4.62826	-3.69
5	e05-33	1.0388	-3.78767	-2.1584
5	e05-38	1.26587	-3.74326	-4.2025
