# Supplementary material for: Improved ANAP incorporation and VCF analysis reveal details of P2X7 current facilitation and a limited conformational interplay between ATP binding and the intracellular ballast domain
Source: eLife journal article supplement (doi:10.7554/elife.82479), 2023-01-04
Supplement: table1-data1 [file Table1_VCFdata.xlsx]

## Sheet: N-terminus
	P2X7(A3*)												P2X7(A3*)
				> 500 nm [ΔF/F%]		430-490 nm [ΔF/F%]		Current [µA]								470- 500 nm [ΔF/F%]		430-470 nm [ΔF/F%]		Current [µA]
Also used in	Expression time [days]	Oocyte batch	Recording	1st Application	2nd Application	1st Application	2nd Application	1st Application	2nd Application	inclusion criteria for analysis are met		Also used in	Expression time [days]	Oocyte batch	Recording	1st Application	2nd Application	1st Application	2nd Application	1st Application	2nd Application	inclusion criteria for analysis are met
	4	1	h06 #12					-3.0773	-2.9553	No			8	11	d20 #11	0.781539		0.99372		-3.14356		No
Fig. 5B / plot	4	1	h06 #16		0.723778		0.36066		-3.5553	Yes			8	11	d20 #12							No
Fig. 5B / plot	4	1	h06 #17		1.12327		0.986849		-3.7194	Yes			7	11	d19 #01							No
Fig. 5B / plot	4	1	h06 #18		0.850085		0.605541		-2.7621	Yes			7	11	d19 #06							No
Fig. 5B / plot	3	2	h16 #14		1.62186		0.726906		-2.7773	Yes			4	11	d16 #13					-2.1801		No
Fig. 5B / plot	3	2	h16 #17	0	0.286524	0	0.25117	-3.0819	-3.0463	Yes			4	11	d16 #15					-1.3689		No
	3	2	h16 #18					-2.5516	-2.5207	No			7	12	b12 #11	1.00949	0.669795	1.76259	0.486656	-4.3545	-4.5444	Yes
Fig. 5B / plot	4	2	h17 #16		0.207303		0.0680684		-2.5106	Yes			5	12	b10 #16					-2.198	-2.066	No
Fig. 5B / plot	4	2	h17 #17	0	0	0	0	-2.2207	-2.0807	Yes			4	12	b09 #07							No
Fig. 5B / plot	4	2	h17 #10	0	0	0	0	-1.745	-1.643	Yes			3	12	b08 #07							No
	6	2	h19 #01					-2.4949	-2.5518	No			10	13	b08 #25					-2.0782	-2.277	No
	6	2	h19 #02							No			10	13	b08 #26					-2.597	-2.443	No
Fig. 5B / plot	6	2	h19 #03	0.0697918	0.356346	0.0405363	0.6412	-3.0831	-2.9814	Yes			7	13	b05 #01	0	0	0	0	-3.3654	-3.4776	Yes
Fig. 5B / plot	7	2	h20 #04	0.669114	1.68043	0.831611	1.42618	-3.47583	-3.6888	Yes			7	13	b05 #05					-2.48	-2.559	No
	7	2	h20 #05					-2.3192	-2.183	No			7	13	b05 #12					-2.0857	-2.144	No
Fig. 5B / plot	7	2	h20 #08	0	0.447999	0	0.218698	-2.2917	-2.4749	Yes			6	13	b04 #03	0.397231	0.329355	0.533205	0.401288	-2.33417	-2.48387	Yes
Fig. 5B / plot	7	2	h20 #10	0	0.0959535	0	0.196989	-1.989	-2.187	Yes			6	13	b04 #06					-2.2138	-2.1961	No
	7	2	h20 #11					-2.9599	-2.9535	No			6	13	b04 #08	0.380709	0.580867	0.700556	0.832497	-2.71472	-2.54527	Yes
	11	2	h24 #02							No			6	13	b04 #09	0.737388	0.449365	0.619678	0.405473	-1.7489	-1.6477	Yes
Fig. 5B / plot	4	3	h24 #31	0	0.0993372	0.050673	0.241192	-2.992	-2.785	Yes			5	13	b03 #04					-2.62927	-2.6064	No
Fig. 5B / plot	5	3	h25 #26	0	1.50425	0.176233	1.85239	-2.8544	-2.9729	Yes			5	13	b03 #06					-2.269	-2.3082	No
Fig. 5B / plot	5	3	h25 #28	0.0477382	0.412406	0.175715	0.234785	-3.0603	-3.1791	Yes			4	13	b02 #03					-1.2898	-1.3369	No
Fig. 5B / plot	5	3	h25 #29	0.769466	1.43273	0.647221	1.63736	-3.4057	-3.461	Yes			4	13	b02 #04	0	0	0	0	-2.25	-2.2722	Yes
	6	3	h26 #05					-2.376	-2.4361	No			4	13	b02 #09	0	0	0	0	-2.0821	-2.0499	Yes
Fig. 5B / plot	6	3	h26 #20	0	0	0	0	-2.8954	-2.9508	Yes			4	13	b02 #13	0	0	0	0	-1.83243	-1.85878	Yes
Fig. 5B / plot	6	3	h26 #29	0.28584	0.787231	0.36083	0.644958	-2.8563	-2.9094	Yes			3	13	b01 #08					-2.3664	-2.33929	No
Fig. 5B / plot	6	3	h26 #30	0.0916797	0.689579	0.108825	0.485247	-2.6615	-2.7187	Yes			3	13	b01 #10					-0.6066	-0.5985	No
Fig. 5B / plot	6	3	h26 #47	0.450685	0.767905	0.413233	0.47607	-2.58102	-2.65186	Yes
	5	4	k02 #10					-0.1622	-0.4153	No
	4	5	k06 #41					-0.53686	-0.61792	No
	4	5	k06 #42					-0.1621	-0.154	No
	4	5	k06 #52					-1.4179	-1.4225	No
	4	5	k06 #53							No
	5	5	k07 #16					-0.2952	-0.41686	No
	5	5	k07 #17					-0.4055	-0.4817	No
	6	5	k08 #02					no current		No
	6	5	k08 #20					no current		No
	6	5	k08 #21					-0.6991	-0.7899	No
Fig. 5B / plot	6	5	k08 #22	0.756407	1.0045	0.317532	0.940014	-1.8376	-1.8803	Yes
	6	5	k08 #38					-1.1048	-1.0687	No
Fig. 5B / plot	6	5	k08 #39	0.697573	1.22091	0.334675	1.12525	-1.995	-2.0002	Yes
	6	5	k08 #45							No
	P2X7(C5*)												P2X7(C5*)
				> 500 nm [ΔF/F%]		430-490 nm [ΔF/F%]		Current [µA]								470- 500 nm [ΔF/F%]		430-470 nm [ΔF/F%]		Current [µA]
Also used in	Expression time [days]	Oocyte batch	Recording	1st Application	2nd Application	1st Application	2nd Application	1st Application	2nd Application	inclusion criteria for analysis are met		Also used in	Expression time [days]	Oocyte batch	Recording	1st Application	2nd Application	1st Application	2nd Application	1st Application	2nd Application	inclusion criteria for analysis are met
	5	3	h25 #34					-2.405	-2.5866	No			7	14	d30 #08	0.118686	0.683307	0.110352	0.529934	-4.0646	-4.1994	Yes
Fig. 5B / plot	5	3	h25 #36	1.50756	2.93409	1.09078	2.72193	-2.1425	-2.2419	Yes			6	14	d29 #04					-1.9157	-1.9573	No
Fig. 5B / plot	6	3	h26 #21	0.106432	0.617238	0.334488	0.817252	-2.89683	-2.92718	Yes			5	14	d28 #00	0.0780916	0.169433	0.0629282	0.0450041	-3.0523	-2.8803	Yes
Fig. 5B / plot	6	3	h26 #22	0.495404	2.88661	0.345447	3.07719	-2.60356	-2.69535	Yes			4	14	d27 #18					-2.3812	-2.5271	No
Fig. 5B / plot	6	3	h26 #37	1.30567	2.457	0.859552	2.69845	-2.48929	-2.4767	Yes			3	14	d26 #16					-1.0269	-0.871	No
	4	5	k06 #23					no current		No			3	14	d26 #18					no current		No
Fig. 5B / plot	4	5	k06 #24	0.328375	0.0566825	0.155103	0.497289	-1.76622	-1.86808	Yes			3	14	d26 #20					-1.819	-1.474	No
Fig. 5B / plot	4	5	k06 #25	0.792479	0.229289	0.408453	0.323881	-2.06822	-2.09697	Yes
	5	5	k07 #36					-0.3714	-0.4331	No
	5	5	k07 #35					-0.3066	-0.4394	No
	5	5	k07 #37					-0.5141	-0.592	No
	6	5	k08 #03					-0.5774	-0.7072	No
	6	5	k08 #53					-2.3602	-2.3296	No
	6	5	k08 #52							No
	6	5	k08 #14					no current		No
	6	5	k08 #12					no current		No
	6	5	k08 #04					no current		No
	10	6	e03 #06					-2.47186	-2.49973	No
	P2X7(S6*)												P2X7(S6*)
				> 500 nm [ΔF/F%]		430-490 nm [ΔF/F%]		Current [µA]								470- 500 nm [ΔF/F%]		430-470 nm [ΔF/F%]		Current [µA]
Also used in	Expression time [days]	Oocyte batch	Recording	1st Application	2nd Application	1st Application	2nd Application	1st Application	2nd Application	inclusion criteria for analysis are met		Also used in	Expression time [days]	Oocyte batch	Recording	1st Application	2nd Application	1st Application	2nd Application	1st Application	2nd Application	inclusion criteria for analysis are met
	5	3	h25 #35					-1.1599	-1.1679	No			7	14	d30 #06					-2.4739	-2.4381	No
	6	3	h26 #23					-0.83206	-0.80774	No			7	14	d30 #07					-1.3786	-1.439	No
	6	3	h26 #24					-2.344	-2.4022	No			5	14	d28 #11							No
	6	3	h26 #43					-0.7688	-0.7607	No			4	14	d27 #22					-0.3666	-0.4687	No
	6	3	h26 #25					-1.7793	-1.7196	No			4	14	d27 #23					-0.4363	-0.498	No
	4	5	k06 #28					no current		No			3	14	d26 #17					no current		No
	4	5	k06 #29							No			3	14	d26 #21					-0.1443		No
	5	5	k07 #44					-0.37142	-0.4136	No
	5	5	k07 #49					-0.2888	-0.352	No
	5	5	k07 #40							No
	5	5	k07 #47					no current		No
	6	5	k08 #13					-0.95978	-1.0204	No
	6	5	k08 #50					no current		No
	P2X7(W7*)												P2X7(W7*)
				> 500 nm [ΔF/F%]		430-490 nm [ΔF/F%]		Current [µA]								470- 500 nm [ΔF/F%]		430-470 nm [ΔF/F%]		Current [µA]
Also used in	Expression time [days]	Oocyte batch	Recording	1st Application	2nd Application	1st Application	2nd Application	1st Application	2nd Application	inclusion criteria for analysis are met		Also used in	Expression time [days]	Oocyte batch	Recording	1st Application	2nd Application	1st Application	2nd Application	1st Application	2nd Application	inclusion criteria for analysis are met
	3	2	h16 #03					-2.19756	-2.23794	No			7	14	d30 #03							No
Fig. 5B / plot	3	2	h16 #13	0.712336		1.02948		-2.8194		Yes			5	14	d28 #09					-3.5311	-3.6337	No
Fig. 5B / plot	3	2	h16 #15	0.222522	0.0471076	1.10796	0.142559	-2.99043	-2.9573	Yes			4	14	d27 #21							No
Fig. 5B / plot	3	2	h16 #16	0.549221	0.260049	0.571861	0.194265	-3.18569	-3.2664	Yes			4	14	d27 #24					no current		No
Fig. 5B / plot	4	2	h17 #09	0	0	0	0	-3.3284	-3.3838	Yes			4	14	d27 #25	0.809322	0.894704	1.43949	1.21142	-2.3811	-2.62927	Yes
Fig. 5B / plot	4	2	h17 #11	0.200077	0.490046	0.251144	0.433861	-4.0922	-4.118	Yes			3	14	d26 #22					-1.1643	-1.2032	No
Fig. 5B / plot	4	2	h17 #12	0	0	0	0	-1.4113	-1.5397	Yes			3	14	d26 #23					-1.784	-1.9269	No
Fig. 5B / plot	6	2	h19 #09	0	0	0	0	-2.6605	-2.6521	Yes			3	14	d26 #24					-1.319	-1.3819	No
Fig. 5B / plot	6	2	h19 #11	0.201559	0.181448	0.406255	0.0693549	-2.4497	-2.592	Yes
Fig. 5B / plot	6	2	h19 #23	0.338971	0.4466	1.23874	0.434327	-2.7021	-2.6977	Yes
Fig. 5B / plot	6	2	h19 #24	0	0	0.377016	0.24368	-2.6051	-2.5545	Yes
	7	2	h20 #01					-3.5242	-3.8017	No
	7	2	h20 #03					-2.3242	-2.3684	No
	7	2	h20 #02							No
	11	2	h24 #03					-3.1155	-3.5729	No
Fig. 5B / plot	4	3	h24 #27	0.931938	0.638982	1.96361	0.576566	-3.522	-3.57	Yes
Fig. 5B / plot	4	3	h24 #28	0.0884944	0.23687	0.523296	0.130429	-4.2674	-4.4316	Yes
Fig. 5B / plot	4	3	h24 #29	0.243171	0.219004	0.886123	0.329555	-4.1981	-4.2896	Yes
Fig. 5B / plot	4	3	h24 #32	0.960564	0.823537	1.14686	0.913856	-2.58422	-2.61165	Yes
	4	3	h24 #30					-3.784		No
	5	3	h25 #01							No
Fig. 5B / plot	5	3	h25 #13	1.00079	0.370181	1.91052	0.384458	-2.08956	-2.20889	Yes
Fig. 5B / plot	5	3	h25 #10	0.579951	0.0381006	0.458512	0.0908459	-2.6287	-2.7041	Yes
Fig. 5B / plot	5	3	h25 #11	0.953579	0.300845	1.24254	0.302152	-2.5807	-2.6475	Yes
Fig. 5B / plot	5	3	h25 #12	0.244999	0.24161	0.889138	0.322664	-2.34558	-2.4442	Yes
Fig. 5B / plot	6	3	h26 #16	0.565727	0.333844	0.667045	0.200921	-2.7245	-2.772	Yes
Fig. 5B / plot	6	3	h26 #46	0.478037	0.14941	1.06164	0.129913	-2.88434	-2.9944	Yes
	P2X7(V10*)												P2X7(V10*)
				> 500 nm [ΔF/F%]		430-490 nm [ΔF/F%]		Current [µA]								470- 500 nm [ΔF/F%]		430-470 nm [ΔF/F%]		Current [µA]
Also used in	Expression time [days]	Oocyte batch	Recording	1st Application	2nd Application	1st Application	2nd Application	1st Application	2nd Application	inclusion criteria for analysis are met		Also used in	Expression time [days]	Oocyte batch	Recording	1st Application	2nd Application	1st Application	2nd Application	1st Application	2nd Application	inclusion criteria for analysis are met
	5	3	h25 #22					-1.3607	-1.49183	No			8	11	d20#10					-2.2122	-2.1941	No
	5	3	h25 #23					-0.3293	-0.4801	No			8	11	d20 #13					-2.0515	-2.1946	No
	6	3	h26 #39					-2.73491	-2.80745	No			7	11	d19 #05					-1.4772		No
	6	3	h26 #38	0.203469	1.11063	0.257994	1.00207	-2.1618	-2.33191	Yes			3	11	d15 #07					-0.281	-0.2	No
	6	3	h26 #40	0.919874	1.26313	0.52964	1.22398	-2.4934	-2.5192	Yes
	4	5	k06 #37					no current		No
	4	5	k06 #38					no current		No
	5	5	k07 #55					-0.13626	-0.1995	No
	5	5	k07 #50					-2.5105	-2.3551	No
	5	5	k07 #52					-2.2241	-1.847	No
	5	5	k07 #53					-0.3293	-0.3779	No
	5	5	k07 # 54					no current		No
	6	5	k08 #15					-0.9582	-1.0852	No
	6	5	k08 #46					-0.46224	-0.57738	No
	6	5	k08 #47					-0.4817	-0.5255	No
	6	5	k08 #16					no current		No
	6	5	k08 #05					no current		No
	6	5	k08 #42					no current		No
	6	5	k08 #43					no current		No
	6	5	k08 #44					no current		No
	6	5	k08 #49					no current		No
	P2X7(F11*)												P2X7(F11*)
				> 500 nm [ΔF/F%]		430-490 nm [ΔF/F%]		Current [µA]								470- 500 nm [ΔF/F%]		430-470 nm [ΔF/F%]		Current [µA]
Also used in	Expression time [days]	Oocyte batch	Recording	1st Application	2nd Application	1st Application	2nd Application	1st Application	2nd Application	inclusion criteria for analysis are met		Also used in	Expression time [days]	Oocyte batch	Recording	1st Application	2nd Application	1st Application	2nd Application	1st Application	2nd Application	inclusion criteria for analysis are met
	5	3	h25 #32					-2.53	-2.705	No			7	14	d30 #04	1.50113	0.270078	1.80728	0.280873	-3.599	-3.4304	Yes
Fig. 5B / plot	5	3	h25 #30	2.08777	1.51987	2.2225	1.30697	-2.8737	-2.963	Yes			5	14	d28 #10							No
Fig. 5B / plot	5	3	h25 #31	1.48715	1.23362	2.20243	1.40354	-2.3766	-2.5192	Yes			4	14	d27 #19	0	0	0	0	-3.361	-3.3753	Yes
Fig. 5B / plot	5	3	h25 #33	0.894326	1.91407	0.865325	1.75037	-1.4403	-1.51972	Yes			4	14	d27 #20							No
Fig. 5B / plot	6	3	h26 #14	0.281169	0.406371	0.546557	0.364007	-2.3665	-2.37602	Yes			3	14	d26 #25	0	0	0	0	-2.538	-2.5272	Yes
Fig. 5B / plot	6	3	h26 #15	0.661111	0.561285	2.22087	1.00851	-2.1998	-2.31107	Yes
Fig. 5B / plot	6	3	h26 #42	0.245875	0.262045	0.920232	0.44709	-2.65078	-2.73254	Yes
	5	7	j08 #22					-0.85967	-0.88883	No
	5	7	j08 #23					-1.55029	-1.64013	No
	5	7	j08 #40					-1.5585	-1.5835	No
	5	7	j08 #20					-2.176	-2.1001	No
	5	7	j08 #41					-0.30173	-0.3942	No
	5	7	j08 #21							No
	5	7	j08 # 39					-1.6024	-1.537	No
	6	7	j09 #16					-1.723	-1.8762	No
Fig. 5B / plot	6	7	j09 #19	0.675006	0.660134	0.95634	0.384553	-2.0614	-2.058	Yes
Fig. 5B / plot	6	7	j09 #30	0.688954	0.564582	1.22092	0.502105	-2.5904	-2.5453	Yes
	6	7	j09 #35					-1.3168	-1.4788	No
	6	7	j09 #18					-0.43634	-0.47522	No
	6	7	j09 #14	0.64082		2.76851		-2.6082		No
	6	7	j09 #36					-1.3155	-1.229	No
Fig. 5B / plot	7	7	j10 #04	0.252227	0.360214	1.40444	0.844635	-2.4894	-2.283	Yes
Fig. 5B / plot	7	7	j10 #09	0.0967205	0	0.881479	0.603181	-2.7528	-2.7444	Yes
	3	4	j30 #27					-0.3293	-0.4574	No
	3	4	j30 #28					-2.09189	-2.22416	No
	4	4	k01 #22					-1.1794	-1.24924	No
	4	4	k01 #03					0.325403	0.520161	No
	5	4	k02 #07					-1.0995	-1.2785	No
Fig. 5B / plot	5	4	k02 #09	0	0	0.912506	0.448949	-2.3905	-2.3566	Yes
	5	4	k02 #08							No
	2	5	k04 #21					no current		No
Fig. 5B / plot	4	5	k06 #30	0.928724	0.822585	1.19933	0.739064	-1.69286	-1.74835	Yes
	4	5	k06 #54					-1.39665	-1.52451	No
	4	5	k06 #31					no current		No
	4	5	k06 #32					no current		No
	4	5	k06 #36							No
	5	5	k07 #05					-0.981	-1.3269	No
	5	5	k07 #06					-0.69742	-0.95556	No
	6	5	k08 #30					-1.7565	-1.8998	No
Fig. 5B / plot	6	5	k08 #36	0.333585	0.294728	0.635364	0.622835	-1.6219	-1.6736	Yes
	6	5	k08 #29					-1.44683	-0.932602	No
	6	5	k08 #37					-0.7961	-0.8494	No
	4	8	m07 #11					-0.4623	-0.5886	No
Fig. 5B / plot	6	8	m09 #22	0.333767	0.435314	0.623804	0.426505	-2.0085	-2.021	Yes
	3	9	22a31 #41					-0.72497	-0.79153	No
Fig. 5B / plot	3	10	22a31 #35			0.583767	0.463123	-1.49191	-1.6136	Yes
	3	10	22a31 #36					-1.2729	-1.4356	No
	4	9	22b01 #38					-0.2514		No
Fig. 5B / plot	4	10	22b01 #34			2.89724	2.36144	-2.35651	-2.45127	Yes
	5	9	22b02 #23					-1.328	-1.601	No
	5	9	22b02 #24					-1.3365	-1.38218	No
	5	9	22b02 #26					-2.15905	-2.30807	No
	5	10	22b02 #25					-1.4516	-1.676	No
Fig. 5B / plot	6	9	22b03 #02			1.1376	0.518644	-2.99865	-3.1128	Yes
Fig. 5B / plot	6	9	22b03 #03			1.70302	0.905849	-2.8061	-2.7334	Yes
Fig. 5B / plot	6	9	22b03 #16			1.29021	1.11055	-2.3986	-2.188	Yes
Fig. 5B / plot	6	10	22b03 #01			0.555589	0.206989	-3.0931	-3.3327	Yes
Fig. 5B / plot	6	10	22b03 #09			2.40095	0.838106	-2.81127	-2.962	Yes
Fig. 5B / plot	6	10	22b03 #17			2.00611	1.56235	-2.4571	-2.57932	Yes
	P2X7(K17*)												P2X7(K17*)
				> 500 nm [ΔF/F%]		430-490 nm [ΔF/F%]		Current [µA]								470- 500 nm [ΔF/F%]		430-470 nm [ΔF/F%]		Current [µA]
Also used in	Expression time [days]	Oocyte batch	Recording	1st Application	2nd Application	1st Application	2nd Application	1st Application	2nd Application	inclusion criteria for analysis are met		Also used in	Expression time [days]	Oocyte batch	Recording	1st Application	2nd Application	1st Application	2nd Application	1st Application	2nd Application	inclusion criteria for analysis are met
	6	5	k08 #17					-0.2109	-0.2303	No			7	13	b05 #04					-1.755	-1.845	No
	6	5	k08 #18							No			6	13	b04 #11					-1.8009	-1.8187	No
	6	5	k08 #19							No			5	13	b03 #05					-1.0381	-1.0295	No
	6	5	k08 #40					no current		No			4	13	b02 #05					-1.53746	-1.60372	No
	6	5	k08 #41					-0.5969	-0.6278	No			4	13	b02 #16					-1.3563	-1.30762	No
	6	5	k08 #48					no current		No			3	13	b01 #13					-1.0346	-0.907	No
	6	5	k08 #54					no current		No
	5	5	k07 #22					no current		No
	5	5	k07 #26					-0.18005		No
	5	5	k07 #27					-0.12491		No
	5	5	k07 #28					-0.3552	-0.375	No
	4	5	k06 #39					no current		No
	4	5	k06 #40					-0.56115	-0.4752	No
	6	3	h26 #17	0	0	0	0	-1.76	-1.7545	Yes
	6	3	h26 #18					-1.4664	-1.3548	No
	5	5	h25 #24					-0.2579	-0.2692	No
	5	5	h25 #25	0.0168966	0.416067	0.198095	0.242244	-2.2478	-2.3015	Yes
	5	5	h25 #27					-1.2218	-1.3159	No
	4	5	h24 #26					-0.90016	-0.76557	No

## Sheet: Head-domain
	P2X7(P120*)												P2X7(P120*)
				> 500 nm [ΔF/F%]		430-490 nm [ΔF/F%]		Current [µA]								470- 500 nm [ΔF/F%]		430-470 nm [ΔF/F%]		Current [µA]
Also used in	Expression time [days]	Oocyte batch	Recording	1st Application	2nd Application	1st Application	2nd Application	1st Application	2nd Application	inclusion criteria for analysis are met		Also used in	Expression time [days]	Oocyte batch	Recording	1st Application	2nd Application	1st Application	2nd Application	1st Application	2nd Application	inclusion criteria for analysis are met
Fig. 3D / boxplot	3	2	h16#22	0.699242	0.878849	1.01691	1.51608	-2.21116	-2.3629	Yes		Fig. 2 - fig. suppl 1B / boxplot	5	16	b25 #03	2.72027	2.4242	2.12164	1.78399	-2.1768	-2.089	Yes
Fig. 3D / boxplot	3	2	h16#23	1.23924	1.32969	2.14799	2.28552	-2.7462	-2.5771	Yes			4	16	b24 #08					-2.6553	-2.4051	No
	3	2	h16#24					-4.373		No		Fig. 2 - fig. suppl 1B / boxplot	4	16	b24 #21	3.2523	3.44369	2.7288	3.21058	-1.5737	-1.5923	Yes
Fig. 3D / boxplot	4	2	h17#01	1.47775	2.45326	2.6694	3.25643	-2.6715	-2.6761	Yes			3	16	b23 #03					-1.70354	-1.5737	No
	4	2	h17#02					-2.8593	-2.6702	No
	4	2	h17#03					-3.9561	-3.4628	No
Fig. 3D / boxplot	4	2	h17#04	0.542078	0.662896	0.91939	0.642042	-3.0189	-3.1111	Yes
Fig. 3D / boxplot	6	2	h19#05	1.19671	1.19133	2.03329	2.29847	-2.981	-2.8657	Yes
	6	2	h19#10					-2.6263	-1.987	No
Fig. 3D / boxplot	6	2	h19#25	0.986665	1.37609	1.48689	2.00422	-2.6322	-2.4787	Yes
	4	15	h31#16					-2.7861	-2.7885	No
Fig. 3D / boxplot	5	15	j01#06	0	0	0	0	-3.40594	-3.65058	Yes
	5	15	j01#08					-2.8533	-2.9987	No
	5	15	j01#21					-2.7768	-2.8544	No
	6	15	j02#08					-2.8762	-3.0109	No
	6	15	j02#09					-2.8867	-3.0658	No
	6	15	j02#10					-2.5758	-2.6196	No
Fig. 3D / boxplot	5	7	j08#07	1.39247	1.42521	2.13254	2.57804	-2.2367	-2.3646	Yes
Fig. 3D / boxplot	5	7	j08#08	1.90142	2.01316	2.81658	3.25216	-3.0351	-3.153	Yes
Fig. 3D / boxplot	5	7	j08#44	2.73712	2.43388	2.48167	2.66309	-1.81802	-2.00451	Yes
	P2X7(E121*)												P2X7(E121*)
				> 500 nm [ΔF/F%]		430-490 nm [ΔF/F%]		Current [µA]								470- 500 nm [ΔF/F%]		430-470 nm [ΔF/F%]		Current [µA]
Also used in	Expression time [days]	Oocyte batch	Recording	1st Application	2nd Application	1st Application	2nd Application	1st Application	2nd Application	inclusion criteria for analysis are met		Also used in	Expression time [days]	Oocyte batch	Recording	1st Application	2nd Application	1st Application	2nd Application	1st Application	2nd Application	inclusion criteria for analysis are met
Fig. 3D / boxplot	4	17	j21#19	0.327135	0.157026	0.363216	0.052785	-2.5838	-2.394	Yes			6	16	b26 #29					-1.4352	-1.7017	No
	4	17	j21#20					-2.3701		No			6	16	b26 #33					-3.12846	-3.0637	No
Fig. 3D / boxplot	4	17	j21#24	0.292158	0.335297	0.08398	0.340696	-2.16058	-2.19816	Yes			6	16	b26 #34					-1.6465	-1.61554	No
	5	17	j22#08					-1.2667	-1.4921	No		Fig. 2 - fig. suppl 1B / boxplot	5	16	b25 #19	0.933379	1.20173	1.19637	1.07661	-1.5534	-1.6231	Yes
	5	17	j22#11					-1.2211	-1.4389	No			4	16	b24 #07					-1.3345	-1.4238	No
	5	17	j22#14					-1.48932	-1.6929	No			4	16	b24 #20					-0.8549	-0.5738	No
Fig. 3D / boxplot	5	17	j22#15	0.21168	0.491413	0.228347	0.431977	-0.9214	-0.9454	Yes			3	16	b23 #05					-0.5628	-0.5936	No
	5	17	j22#17					-0.9371	-1.1713	No
	4	4	j28#10					-0.47524	-0.54656	No
	4	4	j28#11					-1.2728	-1.46305	No
Fig. 3D / boxplot	7	4	k01#12	1.18564		0.421895		-1.5881		Yes
	7	4	k01#37					-0.206	-0.4558	No
Fig. 3D / boxplot	8	4	k02#05	1.14375	1.20427	0.325777	0.39021	-1.4595	-1.5454	Yes
	4	17	j21#18					-0.5758		No
	2	4	k04#31					-0.6652	-0.993	No
	6	4	k08#08					no current		No
	5	4	j29#18					-1.64465	-1.86027	No
	5	4	j29#22					-0.95016	-1.12269	No
	P2X7(Y122*)												P2X7(Y122*)
				> 500 nm [ΔF/F%]		430-490 nm [ΔF/F%]		Current [µA]								470- 500 nm [ΔF/F%]		430-470 nm [ΔF/F%]		Current [µA]
Also used in	Expression time [days]	Oocyte batch	Recording	1st Application	2nd Application	1st Application	2nd Application	1st Application	2nd Application	inclusion criteria for analysis are met		Also used in	Expression time [days]	Oocyte batch	Recording	1st Application	2nd Application	1st Application	2nd Application	1st Application	2nd Application	inclusion criteria for analysis are met
	4	17	j21#15					-1.8762	-1.7027	No		Fig. 2 - fig. suppl 1B / boxplot	4	18	b26 #00	-1.99197	-2.16448	-0.953837	-1.05359	-1.7076	-1.7336	Yes
	4	17	j21#16					-2.1214		No		Fig. 2 - fig. suppl 1B / boxplot	4	18	b26 #41	-1.23958	-0.742281	-0.6305	-0.403702	-2.3796	-2.4602	Yes
Fig. 3D / boxplot	4	17	j21#17	-2.03407	-0.73939	-5.32505	-3.62645	-3.2053	-3.2273	Yes		Fig. 2 - fig. suppl 1B / boxplot	3	18	b25 #09	-2.45981	-1.53988	-1.83282	-1.36111	-2.66	-2.675	Yes
Fig. 3D / boxplot	5	17	j22#09	-1.33083	-1.17924	-4.04444	-3.74058	-1.9168	-1.865	Yes
Fig. 3D / boxplot	5	17	j22#13	0	0	-2.38105	-1.95066	-1.9306	-2.02572	Yes
Fig. 3D / boxplot	4	4	j28#04	0	0	-2.68409	-1.51368	-1.24883	-1.28458	Yes
Fig. 3D / boxplot	4	4	j28#05	-1.18088	-0.95087	-2.9068	-2.69874	-2.14427	-2.24138	Yes
	4	4	j28#06					-2.66145	-2.75205	No
Fig. 3D / boxplot	5	4	j29 #04	-1.1434	-1.37853	-2.09115	-1.94341	-2.4218	-2.4754	Yes
Fig. 3D / boxplot	5	4	j29 #05	-0.8863	-0.95257	-2.80388	-2.6214	-1.7808	-1.8913	Yes
	6	4	j30 #31					-0.7363		No
	7	4	k01#05					-2.4734	-2.7829	No
Fig. 3D / boxplot	7	4	k01#13	0	0	-1.39254	-2.10896	-1.9269	-2.023	Yes
Fig. 3D / boxplot	7	4	k01 #14	0	0	-2.18668	-2.62616	-2.8389	-2.8607	Yes
	P2X7(P123*)												P2X7(P123*)
				> 500 nm [ΔF/F%]		430-490 nm [ΔF/F%]		Current [µA]								470- 500 nm [ΔF/F%]		430-470 nm [ΔF/F%]		Current [µA]
Also used in	Expression time [days]	Oocyte batch	Recording	1st Application	2nd Application	1st Application	2nd Application	1st Application	2nd Application	inclusion criteria for analysis are met		Also used in	Expression time [days]	Oocyte batch	Recording	1st Application	2nd Application	1st Application	2nd Application	1st Application	2nd Application	inclusion criteria for analysis are met
	10	4	k04 #01							No			4	18	b26 #05					-0.98094	-1.03691	No
	7	4	k01 #01					-2.6325	-2.772	No			3	18	b25 #07					-0.665	-0.5807	No
	7	4	k01 #02					-0.36	-0.665	No
Fig. 3D / boxplot	7	4	k01#08	-0.92211	-1.56269	-0.42294	-0.72021	-0.8859	-0.915	Yes
Fig. 3D / boxplot	7	4	k01#15	-3.1782	-2.73317	-1.99651	-1.71829	-2.22991	-2.34051	Yes
	6	4	j30 #34					-0.399	-0.4834	No
	6	4	j30 #35					-0.2579		No
Fig. 3D / boxplot	5	4	j29 #13	-3.26222	-2.95085	-2.5912	-1.86049	-2.72784	-2.84482	Yes
Fig. 3D / boxplot	5	4	j29 #14	-2.17391	-2.59445	-1.31711	-1.5631	-1.4971	-1.59432	Yes
	5	4	j29 #26					-1.00045	-1.07169	No
	4	4	j28 #12					-0.54012	-0.63586	No
	4	4	j28 #13					-0.4638		No
Fig. 3D / boxplot	4	4	j28#24	-1.33922	-1.09531	-1.73223	-0.82934	-2.3457	-2.4199	Yes
Fig. 3D / boxplot	5	17	j22 #12	-7.75966	-5.91127	-5.68388	-4.00846	-2.1149	-2.3388	Yes
Fig. 3D / boxplot	5	17	j22 #16	-6.07801	-5.18033	-4.44273	-3.7465	-2.2094	-2.1752	Yes
Fig. 3D / boxplot	5	17	j22 #19	-5.60361	-5.18575	-4.11307	-3.50726	-2.0045	-2.0873	Yes
Fig. 3D / boxplot	4	17	j21 #14	-5.84543	-4.72917	-4.21573	-2.80771	-2.47824	-2.38551	Yes
	P2X7(S124*)												P2X7(S124*)
				> 500 nm [ΔF/F%]		430-490 nm [ΔF/F%]		Current [µA]								470- 500 nm [ΔF/F%]		430-470 nm [ΔF/F%]		Current [µA]
Also used in	Expression time [days]	Oocyte batch	Recording	1st Application	2nd Application	1st Application	2nd Application	1st Application	2nd Application	inclusion criteria for analysis are met		Also used in	Expression time [days]	Oocyte batch	Recording	1st Application	2nd Application	1st Application	2nd Application	1st Application	2nd Application	inclusion criteria for analysis are met
	4	3	h24 #16					-2.6831		No		Fig. 2 - fig. suppl 1B / boxplot	8	16	b24 #13	3.31277	2.92186	15.2979	13.9188	-2.23834	-2.29165	Yes
Fig. 3D / boxplot	4	3	h24#17	-1.08428	-1.7086	6.04998	5.42491	-2.59534	-2.65394	Yes		Fig. 2 - fig. suppl 1B / boxplot	7	16	b23 #12	3.2365	2.52584	11.5167	10.2324	-1.6499	-1.558	Yes
	4	3	h24 #18					-1.13065	-1.1974	No		Fig. 2 - fig. suppl 1B / boxplot	6	16	b22 #10	2.21582	1.81222	11.1218	10.1906	-2.7983	-2.8302	Yes
Fig. 3D / boxplot	4	3	h24#19	-1.85373	-1.9295	7.17442	7.2975	-2.15862	-2.1574	Yes		Fig. 2 - fig. suppl 1B / boxplot	6	16	b22 #11	2.93843	2.77568	14.8666	13.6947	-3.1694	-3.2744	Yes
Fig. 3D / boxplot	4	3	h24#23	-1.00475	-1.16825	2.81623	3.06364	-2.39727	-2.45224	Yes			3	16	b19 #11					-2.1958	-2.141	No
	5	3	h25#02					-1.2198	-1.3888	No			3	16	b19 #12					no current		No
Fig. 3D / boxplot	5	3	h25#03	-2.64774	-2.66775	7.36371	7.87872	-1.43075	-1.57986	Yes		Fig. 2 - fig. suppl 1B / boxplot	3	16	b19 #13	2.45288	2.57842	9.0777	8.53107	-1.6158	-1.5843	Yes
	5	3	h25#06					-1.5051	-1.663	No
Fig. 3D / boxplot	5	3	h25#07	-3.00757	-2.70644	11.8918	11.338	-1.7749	-1.83134	Yes
	6	3	h26 #06							No
Fig. 3D / boxplot	6	3	h26#26	-3.55933	-2.93879	11.9958	11.1195	-2.9751	-3.06894	Yes
Fig. 3D / boxplot	6	3	h26#27	-2.99017	-2.41871	11.5996	10.7005	-2.9064	-2.9356	Yes
	4	15	h31#14					-1.52319	-1.72882	No
	4	15	h31#15					-1.58144	-1.69206	No
Fig. 3D / boxplot	5	15	j01#12	-1.87708	-1.49974	4.10433	4.77375	-2.6207	-2.7529	Yes
Fig. 3D / boxplot	5	15	j01#19	0	0	3.8764	4.18251	-3.5636	-3.6701	Yes
Fig. 3D / boxplot	5	15	j01#22	-0.87142	-0.51271	0.789967	1.52436	-1.9898	-2.0695	Yes
Fig. 3D / boxplot	5	15	j01#24	-0.75916	-0.74494	3.61777	3.78858	-2.261	-2.3728	Yes
Fig. 3D / boxplot	6	15	j02#15	-2.44972	-2.49362	6.61468	6.76001	-2.02583	-2.2058	Yes
	6	15	j02#16					-2.7425	-3.265	No
Fig. 3D / boxplot	6	15	j02#17	-1.14383	-1.24452	5.25148	5.1819	-2.7359	-2.6601	Yes
	3	8	m06 #15					-0.37143	-0.40548	No
	4	8	m07 #12					-0.621	-0.7101	No
Fig. 3D / boxplot	5	8	m08 #04	-1.21931	-1.6041	7.48458	8.08526	-1.5731	-1.6725	Yes
	6	8	m09 #01					-0.7603	-1.069	No
Fig. 3D / boxplot	6	8	m09 #05	-0.8598	-1.77742	5.7958	5.90946	-0.8194	-0.9014	Yes
	6	8	m09 #37					-1.0619	-1.3479	No
	6	8	m09 #46							No
	3	19	22a13 #02					-1.61269	-1.71567	No
Fig. 3D / boxplot	4	19	22a14 #30	-0.13919	-0.53225	3.63684	3.08349	-2.04356	-2.0256	Yes
Fig. 3D / boxplot	4	20	22a28 #24			2.2352	2.95826	-1.9385	-2.0954	Yes
Fig. 3D / boxplot	3	10	22a31 #38			5.36046	6.74746	-1.0267	-1.10156	Yes
	5	10	22b02 #30					-1.2484		No
	5	10	22b02 #32					-2.0484		No
	6	10	22b03 #13					-1.9093	-1.782	No
	6	10	22b03 #21					-1.8493	-1.9581	No
	6	10	22b03 #22						-2.169	No
	P2X7(R125*)												P2X7(R125*)
				> 500 nm [ΔF/F%]		430-490 nm [ΔF/F%]		Current [µA]								470- 500 nm [ΔF/F%]		430-470 nm [ΔF/F%]		Current [µA]
Also used in	Expression time [days]	Oocyte batch	Recording	1st Application	2nd Application	1st Application	2nd Application	1st Application	2nd Application	inclusion criteria for analysis are met		Also used in	Expression time [days]	Oocyte batch	Recording	1st Application	2nd Application	1st Application	2nd Application	1st Application	2nd Application	inclusion criteria for analysis are met
Fig. 3D / boxplot	5	5	k07 #01	-2.27458	-1.73798	3.60033	2.83891	-2.2802	-2.2964	Yes		Fig. 2 - fig. suppl 1B / boxplot	6	12	b11 #09	1.98265	1.79862	2.72741	2.40059	-2.3778	-2.4148	Yes
Fig. 3D / boxplot	5	5	k07 #08	-2.81448	-2.66493	3.32207	3.29454	-1.903	-1.9403	Yes			5	12	b10 #00							No
	5	5	k07 #24					no currents		No		Fig. 2 - fig. suppl 1B / boxplot	4	12	b09 #02	3.36593	3.4487	4.80102	5.02308	-2.7978	-2.814	Yes
	5	5	k07 #25					-1.48927	-1.7518	No		Fig. 2 - fig. suppl 1B / boxplot	4	12	b09 #17	1.08339	1.5009	1.46146	2.27943	-3.0261	-3.1075	Yes
	5	5	k07 #41					-1.93213	-2.616	No			3	12	b08 #02					-1.774	-1.8309	No
	5	5	k07 #42							No			3	12	b08 #20							No
	4	5	k06 #01					-1.63358	-1.8506	No		Fig. 2 - fig. suppl 1B / boxplot	3	12	b08 #21	4.02592	4.79078	5.15298	5.44878	-2.7527	-2.7769	Yes
Fig. 3D / boxplot	4	5	k06 #02	-4.67759	-3.98329	6.2971	6.24129	-2.2469	-2.24343	Yes
	4	5	k06 #45							No
	4	5	k06 #46							No
	4	5	k06 #47					-1.68043	-1.9921	No
Fig. 3D / boxplot	3	5	k05 #25	-1.53007		1.66476		-1.6507		Yes
Fig. 3D / boxplot	3	5	k05 #26	-2.02209	-1.10321	2.0012	2.68244	-2.3571	-2.3551	Yes
Fig. 3D / boxplot	6	2	h19 #17	-11.2229	-9.1459	7.15064	6.30419	-2.7867	-2.8242	Yes
Fig. 3D / boxplot	6	2	h19 # 18	-8.97678	-7.70946	7.77148	6.66358	-3.0623	-3.0281	Yes
Fig. 3D / boxplot	6	2	h19 #19	-8.6652	-6.69126	5.60808	5.09204	-2.3391	-2.3807	Yes
Fig. 3D / boxplot	4	2	h17 #21	-7.24465	-5.87805	4.64131	4.7021	-2.1811	-2.2858	Yes
Fig. 3D / boxplot	4	2	h17 #22	-9.31391	-6.32756	5.8755	5.88565	-2.1169	-2.2689	Yes
Fig. 3D / boxplot	4	2	h17 #23	-7.71925	-5.38308	4.48037	4.76727	-2.2143	-2.3159	Yes
Fig. 3D / boxplot	3	2	h16 #05	-6.64858	-5.8521	2.6548	2.0054	-2.17372	-2.3239	Yes
Fig. 3D / boxplot	3	2	h16 #06	-5.97196	-4.511	4.20041	3.91682	-1.5462	-1.6484	Yes
Fig. 3D / boxplot	3	2	h16 #07	-7.82744	-5.42509	3.01198	3.60785	-2.35462	-2.50229	Yes
Fig. 3D / boxplot	2	1	h05 #05	-6.34066	-5.38138	5.09808	4.63025	-3.5363	-3.7561	Yes
	3	21	22a18 #19					-2.4431	-2.7364	No
Fig. 3D / boxplot	3	19	22a18 #20	-4.92911	-4.29487	0.981809	1.10963	-2.34413	-2.3436	Yes
	P2X7(G126*)												P2X7(G126*)
				> 500 nm [ΔF/F%]		430-490 nm [ΔF/F%]		Current [µA]								470- 500 nm [ΔF/F%]		430-470 nm [ΔF/F%]		Current [µA]
Also used in	Expression time [days]	Oocyte batch	Recording	1st Application	2nd Application	1st Application	2nd Application	1st Application	2nd Application	inclusion criteria for analysis are met		Also used in	Expression time [days]	Oocyte batch	Recording	1st Application	2nd Application	1st Application	2nd Application	1st Application	2nd Application	inclusion criteria for analysis are met
	4	17	j21 #06					no current		No		Fig. 2 - fig. suppl 1B / boxplot	8	16	b24 #14	3.37552	3.27006	3.21947	3.2559	-2.4942	-2.5137	Yes
Fig. 3D / boxplot	4	17	j21#07	1.12529	1.04183	2.16067	2.17598	-2.4521	-2.4427	Yes		Fig. 2 - fig. suppl 1B / boxplot	7	16	b23 #13	2.02777	1.94654	2.56565	2.11053	-2.4798	-2.5075	Yes
	4	17	j21 #08					-0.9525		No		Fig. 2 - fig. suppl 1B / boxplot	6	16	b22 #12	2.83282	3.23543	3.22885	3.43846	-2.90255	-2.9338	Yes
	4	17	j21 #09					-1.4757		No		Fig. 2 - fig. suppl 1B / boxplot	6	16	b22 #16	3.15677	2.90407	3.67476	3.1342	-2.1428	-2.3099	Yes
	4	4	j28#07					-1.79407	-2.00591	No		Fig. 2 - fig. suppl 1B / boxplot	3	16	b19 #14	1.13013	1.25674	0.64957	0.27841	-2.36662	-2.2655	Yes
Fig. 3D / boxplot	4	4	j28#08	0.67424	0.681818	0.346915	0.591229	-1.78234	-1.98029	Yes		Fig. 2 - fig. suppl 1B / boxplot	3	16	b19 #15	1.29503	2.23325	1.72515	1.72287	-2.0326	-2.1038	Yes
Fig. 3D / boxplot	5	4	j29 #06	0	0	0	0	-1.2729	-1.3899	Yes
	5	4	j29 #07					no current		No
Fig. 3D / boxplot	5	4	j29 #08	0.256582	0.365266	0.615698	1.01806	-2.9357	-2.9941	Yes
Fig. 3D / boxplot	5	4	j29 #09	0.862288	0.912116	1.94186	2.03853	-2.4409	-2.5495	Yes
Fig. 3D / boxplot	5	4	j29 #10	0.854507	0.937286	1.59918	2.07474	-2.1083	-2.186	Yes
	5	4	j29 #11					-1.34465	-1.3934	No
Fig. 3D / boxplot	6	4	j30#32	0.45732	0.907375	1.57858	2.00965	-2.1913	-2.3227	Yes
Fig. 3D / boxplot	6	4	j30#33	0.165586	0.326092	0.410734	0.83245	-1.8812	-2.0094	Yes
Fig. 3D / boxplot	7	4	k01#10	1.58834	1.08957	3.77695	2.77685	-1.9516	-2.1309	Yes
Fig. 3D / boxplot	7	4	k01#11	0.912894	1.05459	0.939097	1.31113	-1.63978	-1.78538	Yes
	P2X7(K127*)												P2X7(K127*)
				> 500 nm [ΔF/F%]		430-490 nm [ΔF/F%]		Current [µA]								470- 500 nm [ΔF/F%]		430-470 nm [ΔF/F%]		Current [µA]
Also used in	Expression time [days]	Oocyte batch	Recording	1st Application	2nd Application	1st Application	2nd Application	1st Application	2nd Application	inclusion criteria for analysis are met		Also used in	Expression time [days]	Oocyte batch	Recording	1st Application	2nd Application	1st Application	2nd Application	1st Application	2nd Application	inclusion criteria for analysis are met
Fig. 3D / boxplot	7	4	k01 #06	-13.8367	-13.97	-5.27678	-4.97824	-2.0618	-2.175	Yes		Fig. 2 - fig. suppl 1B / boxplot	4	18	b26 #01	-14.0308	-12.3638	-3.79048	-2.22122	-1.9726	-2.0565	Yes
Fig. 3D / boxplot	7	4	k01 #07	-4.71352	-4.746	-1.6497	-1.23237	-1.9628	-2.0909	Yes			4	18	b26 #22							No
Fig. 3D / boxplot	7	4	k01 #09	-10.695	-9.6526	-3.98248	-3.11549	-1.9336	-2.0279	Yes		Fig. 2 - fig. suppl 1B / boxplot	4	18	b26 #23	-23.0315	-19.3476	-7.73937	-5.62776	-3.3948	-3.3393	Yes
	6	4	j30 #03					-1.2762	-1.4679	No			3	18	b25 #04					-2.3096	-2.3327	No
	6	4	j30 #36					-0.87584	-1.13735	No		Fig. 2 - fig. suppl 1B / boxplot	10	13	b08 #23	-17.364	-15.5018	-5.18836	-3.72057	-2.5463	-2.4993	Yes
	6	4	j30 #37					-1.2264	-1.3678	No		Fig. 2 - fig. suppl 1B / boxplot	5	13	b03 #01	-14.8836	-13.2729	-4.93308	-3.25173	-2.2532	-2.4187	Yes
Fig. 3D / boxplot	6	4	j30 #38	-9.07648	-9.28571	-3.40226	-2.99399	-1.8798	-2.0602	Yes		Fig. 2 - fig. suppl 1B / boxplot	4	13	b02 #01	-9.69241	-8.63744	-4.10553	-2.99176	-2.0002	-2.0291	Yes
	5	4	j29 #12					-0.4687	-0.5547	No		Fig. 2 - fig. suppl 1B / boxplot	4	13	b02 #18	-13.3559	-11.5593	-3.88908	-2.66768	-3.23454	-3.27434	Yes
Fig. 3D / boxplot	5	4	j29 #15	-9.91904	-9.20731	-4.5093	-3.69716	-2.32075	-2.37662	Yes		Fig. 2 - fig. suppl 1B / boxplot	3	13	b01 #09	-7.22683	-6.38498	-1.19411	-1.55973	-1.7582	-1.6899	Yes
Fig. 3D / boxplot	4	4	j28 #01	-3.39838	-3.35878	-1.80092	-1.83564	-2.11496	-2.2446	Yes			3	13	b01 #11					-1.62246	-1.69797	No
Fig. 3D / boxplot	4	4	j28 #09	-8.6532	-9.15527	-3.71179	-4.77709	-1.8551	-1.9614	Yes
	4	4	j28 #21					-0.9387	-1.0152	No
	5	17	j22 #04					-1.2079		No
Fig. 3D / boxplot	5	17	j22 #10	-12.4317	-11.1059	-5.27514	-3.99986	-2.5574	-2.5854	Yes
Fig. 3D / boxplot	4	17	j21 #10	-10.1218	-10.1208	-5.19826	-5.09768	-2.4376	-2.277	Yes
	4	17	j21 #11					-1.718	-1.4807	No
Fig. 3D / boxplot	4	17	j21 #12	-15.9067	-15.7266	-7.45877	-7.18381	-3.0489	-2.9784	Yes
	4	17	j21 #13					-2.4234	-2.1982	No
Fig. 3D / boxplot	7	7	j10 #02	-13.2521	-13.0244	-5.67254	-5.53023	-2.6683	-2.8543	Yes
Fig. 3D / boxplot	7	7	j10 #06	-25.1952	-23.4233	-12.4865	-10.7211	-2.9146	-2.95232	Yes
Fig. 3D / boxplot	7	7	j10 #13	-12.4078	-11.5403	-5.92406	-5.28219	-2.8347	-3.0621	Yes
Fig. 3D / boxplot	7	7	j10 #19	-9.60503	-8.96141	-4.77302	-3.97927	-2.81591	-2.9281	Yes
	6	7	j09#34 form					-1.7568	-1.9061	No
Fig. 3D / boxplot	5	7	j08#24	-17.6389	-16.5756	-8.95477	-8.00709	-2.1229	-2.3147	Yes
	5	7	j08#25					-2.1975	-2.0483	No
Fig. 3D / boxplot	5	7	j08#26	-9.24854	-8.56652	-4.12	-3.48857	-2.4689	-2.3985	Yes
Fig. 3D / boxplot	5	7	j08#45	-12.0833	-10.7485	-5.72336	-4.08231	-2.9636	-3.012	Yes
	3	22	22a10 #02					-1.1611	-1.1891	No
Fig. 3D / boxplot	4	22	22a11 # 39	-15.3296	-14.8132	-7.23685	-6.37604	-2.8446	-2.91	Yes
Fig. 3D / boxplot	5	22	22a12 #05	-13.9452	-14.8672	-7.05466	-8.13354	-3.06994	-3.18767	Yes
	4	20	22a28 #25					-1.7744	-1.9384	No
Fig. 3D / boxplot	4	20	22a28 #26			-6.20113	-5.29517	-2.03602	-2.12	Yes
	3	10	22a31 #40					-0.36169		No
	5	10	22b02 #36					-1.1485	-1.4079	No
	6	10	22b03 #19					-2.3404		No
	6	10	22b03 #20					-2.0839	-2.22072	No
	P2X7(Q128*)												P2X7(Q128*)
				> 500 nm [ΔF/F%]		430-490 nm [ΔF/F%]		Current [µA]								470- 500 nm [ΔF/F%]		430-470 nm [ΔF/F%]		Current [µA]
Also used in	Expression time [days]	Oocyte batch	Recording	1st Application	2nd Application	1st Application	2nd Application	1st Application	2nd Application	inclusion criteria for analysis are met		Also used in	Expression time [days]	Oocyte batch	Recording	1st Application	2nd Application	1st Application	2nd Application	1st Application	2nd Application	inclusion criteria for analysis are met
	6	5	k08 #07					no current		No		Fig. 2 - fig. suppl 1B / boxplot	7	12	b12 #10	0.0786196	0.201364	0.351638	0.458679	-2.877	-2.998	Yes
	5	5	k07 #18					-0.725	-1.0315	No		Fig. 2 - fig. suppl 1B / boxplot	6	12	b11 #11	0.0369849	0.286	0.32211	0.166796	-3.3334	-3.212	Yes
Fig. 3D / boxplot	5	5	k07 #29	0	0	0.529363	0.665907	-1.6897	-1.7825	Yes		Fig. 2 - fig. suppl 1B / boxplot	5	12	b10 #08	0.234816	0.156462	0.0745444	0.180338	-2.7025	-2.4846	Yes
	4	5	k06 #18					-2.2314	-1.9524	No			4	12	b09 #03							No
	4	5	k06 #20					-0.9622	-0.8452	No			3	12	b08 #03					0.136423	0.220035	No
	4	5	k06 #35					-1.9776	-1.82762	No		Fig. 2 - fig. suppl 1B / boxplot	3	12	b08 #19	0	0	0	0	-2.292	-2.47	Yes
	3	5	k05 #38					no current		No
Fig. 3D / boxplot	6	4	j30 #02	-1.64486	-0.97151	0.107165	0.282286	-1.856	-1.9023	Yes
	6	4	j30 #04							No
Fig. 3D / boxplot	6	4	j30 #30	-2.55858	-2.34172	0.694413	0.420195	-1.8996	-1.9708	Yes
Fig. 3D / boxplot	5	4	j29 #02	-2.37386	-2.31545	0.214838	0.419981	-2.2418	-2.3209	Yes
Fig. 3D / boxplot	5	4	j29 #03	-3.56373	-3.25439	0.10004	0.046447	-2.6501	-2.5771	Yes
	5	4	j29 #30					-0.4866	-0.32764	No
Fig. 3D / boxplot	5	4	j29 #31	-3.36429	-2.65632	0.350313	0.496165	-2.3783	-2.5224	Yes
Fig. 3D / boxplot	4	4	j28 #02	-0.32965	-0.48662	0.187323	0.10812	-1.9836	-2.0648	Yes
Fig. 3D / boxplot	4	4	j28 #03	-2.78978	-1.8758	0.058538	0.484075	-2.0221	-2.13007	Yes
	5	17	j22 #06					-1.8576	-1.6866	No
Fig. 3D / boxplot	5	17	j22 #07	-4.56442	-3.95382	1.76207	1.65065	-2.3048	-2.3929	Yes
Fig. 3D / boxplot	4	17	j21 #04	-5.94638	-4.33927	0.845645	1.2308	-3.1612	-3.0558	Yes
Fig. 3D / boxplot	4	17	j21 #05	-4.42335	-3.58707	1.21728	1.30431	-2.5769	-2.5919	Yes

## Sheet: TM2
	P2X7(G338*)												P2X7(G338*)
				> 500 nm [ΔF/F%]		430-490 nm [ΔF/F%]		Current [µA]								470- 500 nm [ΔF/F%]		430-470 nm [ΔF/F%]		Current [µA]
Also used in	Expression time [days]	Oocyte batch	Recording	1st Application	2nd Application	1st Application	2nd Application	1st Application	2nd Application	inclusion criteria for analysis are met		Also used in	Expression time [days]	Oocyte batch	Recording	1st Application	2nd Application	1st Application	2nd Application	1st Application	2nd Application	inclusion criteria for analysis are met
	7	4	k01 #23					no current		No
	7	4	k01 #24					no current		No
	6	4	j30 #23					no current		No
	P2X7(S339*)												P2X7(S339*)
				> 500 nm [ΔF/F%]		430-490 nm [ΔF/F%]		Current [µA]								470- 500 nm [ΔF/F%]		430-470 nm [ΔF/F%]		Current [µA]
Also used in	Expression time [days]	Oocyte batch	Recording	1st Application	2nd Application	1st Application	2nd Application	1st Application	2nd Application	inclusion criteria for analysis are met		Also used in	Expression time [days]	Oocyte batch	Recording	1st Application	2nd Application	1st Application	2nd Application	1st Application	2nd Application	inclusion criteria for analysis are met
	6	5	k08 #10							No			7	13	b05 #08	11.6326	11.4907	5.73672	6.51033	-2.6049	-2.4816	Yes
	5	5	k07 #10					-1.3123	-1.4774	No			6	13	b04 #04	5.1218	5.68002	2.92605	2.75644	-2.6619	-2.5287	Yes
Fig. 4B / plot	5	5	k07 #12	0.60269	1.09886	0.65318	1.06154	-2.317	-2.26	Yes			6	13	b04 #05	7.14862	6.63614	4.58779	4.0116	-2.6761	-2.6306	Yes
	5	5	k07 #13					-0.1589	-0.2579	No			6	13	b04 #07					-3.114		No
Fig. 4B / plot	5	5	k07 #14	0.635968	1.05971	0.355037	0.678608	-1.8495	-2.0287	Yes			4	13	b02 #07					-1.2428	-1.3869	No
	4	5	k06 #03					-0.9258	-1.0913	No			4	13	b02 #08					-1.7228	-1.7062	No
	4	5	k06 #04					-2.2058	-1.9671	No			4	13	b02 #12					-2.2582	-2.2606	No
	4	5	k06 #05					-0.4506	-0.6015	No			3	13	b01 #03					-0.6974	-0.8968	No
	3	5	k05 #07							No			3	13	b01 #14					-0.2579	-0.3649	No
	3	5	k05 #08							No
	3	5	k05 #23					-0.9407	-1.0607	No
	3	5	k05 #24					-1.11605	-1.34129	No
	3	5	k05 #39							No
	7	4	k01 #16					-2.026	-2.162	No
	7	4	k01 #17					-0.7788		No
	7	4	k01 #18					-2.1828		No
Fig. 4B / plot	7	4	k01 #32		1.69848		1.40052		-1.8519	Yes
	7	4	k01 #33					-0.1557		No
Fig. 4B / plot	6	4	j30 #19	2.40069	1.17718	2.02516	0.7581	-2.1281	-2.2478	Yes
	6	4	j30 #20					-1.09854	-1.35807	No
	6	4	j30 #21					-1.0608		No
	6	4	j30 #22					-1.0805		No
	P2X7(T340*)												P2X7(T340*)
				> 500 nm [ΔF/F%]		430-490 nm [ΔF/F%]		Current [µA]								470- 500 nm [ΔF/F%]		430-470 nm [ΔF/F%]		Current [µA]
Also used in	Expression time [days]	Oocyte batch	Recording	1st Application	2nd Application	1st Application	2nd Application	1st Application	2nd Application	inclusion criteria for analysis are met		Also used in	Expression time [days]	Oocyte batch	Recording	1st Application	2nd Application	1st Application	2nd Application	1st Application	2nd Application	inclusion criteria for analysis are met
	5	5	k07 #09					no current		No		Fig. 4C / plot	4	14	d30 #10	15.0453	11.4945	-2.91024	-2.98584	-1.8394	-2.0393	Yes
	4	5	k06 #10					-1.351		No			3	14	d29 #07							No
	4	5	k06 #11					-3.861		No		Fig. 4C / plot	3	14	d29 #08	3.66233	3.44309	0.142874	0	-3.0931	-3.113	Yes
	4	5	k06 #12					-2.1619		No			5	14	d28 #02							No
	4	5	k06 #26					no current		No			5	14	d28 #03					-2.646	-2.574	No
	4	5	k06 #55					no current		No			5	14	d28 #04					-5.1643	-4.321	No
Fig. 4B / plot	3	5	k05 #05	2.9237	2.94148	1.21074	0.668758	-1.552	-1.593	Yes			2	14	d28 #06					-1.041		No
Fig. 4B / plot	3	5	k05 #10	4.10795	2.69669	0.786346	0	-1.104	-1.084	Yes		Fig. 4C / plot	4	14	d27 #27	4.81472	3.6888	0	0	-1.823	-1.74	Yes
	3	5	k05 #35					-1.0659	-1.022	No			4	14	d27 #28					-2.788	-2.751	No
	3	5	k05 #40					-1.181	-0.973	No		Fig. 4C / plot	4	14	d27 #32	4.37631	5.31067	0	0	-3.171	-3.094	Yes
	2	5	k04 #12					-0.96143	-1.00918	No			4	14	d27 #33					-2.0764		No
	2	5	k04 #13					-0.92943	-0.95699	No		Fig. 4C / plot	4	14	d27 #38	9.47847	7.32911	-0.2634	-1.56888	-3.4211	-3.3832	Yes
	4	4	k01 #31					no current		No			3	14	d26 #01					-2.7895	-2.7703	No
Fig. 4B / plot	4	4	k01 #35	8.68569	6.39919	1.68826	0	-2.5047	-2.5954	Yes			3	14	d26 #02							No
	4	4	k01 #36					no current		No			3	14	d26 #04							No
Fig. 4B / plot	3	4	j30 #05	1.48151	1.35428	0.101536	0	-2.5542	-2.5282	Yes			3	14	d26 #19							No
Fig. 4B / plot	3	4	j30 #06	4.07606	2.47849	1.01168	0	-2.7342	-2.7508	Yes		Fig. 4C / plot	4	24	d23 #10	10.9953	9.39317	-3.35357	-4.64547	-2.9131	-2.879	Yes
	3	4	j30 #29					-0.271		No			4	24	d23 #14					-3.5833	-3.229	No
	2	4	j29 #23							No			3	24	d22 #05							No
	2	4	j29 #24							No			3	24	d22 #06							No
	1	4	j28 #20					no current		No			3	24	d22 #14							No
	7	23	e07 #24					no current		No			3	24	d22 #22					-1.972	-1.932	No
	7	6	e03 #03							No			4	11	d20 #14							No
	7	6	e03 #04							No			3	11	d19 #09							No
Fig. 4B / plot	3	23	e03 #05	12.5523	11.2105	2.90169	0.59039	-1.75182	-1.71624	Yes			7	11	d19 #11							No
	2	8	m05 #08					-1.1544	-1.1228	No			7	11	d19 #12					-2.2397		No
	2	8	m05 #09					-1.4127		No			4	11	d16 #00					-1.1404		No
Fig. 4B / plot	3	8	m06 #01	14.1025	9.91318	3.61117	0.664691	-1.6789	-1.6772	Yes			4	11	d16 #02					-1.5914		No
	3	20	22a27 #01							No		Fig. 4C / plot	3	11	d15 #02	2.87122	1.87007	0	0	-1.1173	-1.1155	Yes
Fig. 4B / plot	3	20	22a27 #02			2.60942	0.819621	-1.2979	-1.2533	Yes			2	11	d14 #02					-1.2489	-1.108	No
	3	20	22a27 #03							No			6	16	b26 #18							No
Fig. 4B / plot	3	20	22a27 #31			6.84467	0	-2.7165	-2.7829	Yes			4	16	b24 #11					-2.497	-2.415	No
Fig. 4B / plot	3	20	22a27 #32			4.37539	0	-2.5029	-2.761	Yes		Fig. 4C / plot	4	16	b24 #12	31.8103	18.853	0	-3.68982	-1.988	-2.1082	Yes
	4	20	22a28 #33					-1.278	-1.181	No		Fig. 4C / plot	3	16	b23 #11	23.203	16.913	1.2468	-3.64683	-2.9872	-2.8306	Yes
	3	10	22a31 #02							No			3	16	b19# 00							No
Fig. 4B / plot	3	10	22a31 #16			2.17569	0	-2.623	-2.4852	Yes			3	16	b19 #02					-2.44443	-2.1266	No
Fig. 4B / plot	3	10	22a31 #17			10.6489	1.31897	-2.845	-2.69	Yes		Fig. 4C / plot	7	12	b12 #05	4.95545	3.3985	0.424412	0	-2.629	-2.676	Yes
	3	10	22a31 #42							No		Fig. 4C / plot	5	12	b10 #15	5.87658	4.10823	0	0	-3.4124	-3.4724	Yes
Fig. 4B / plot	3	10	22a31 #43			6.5287	0.247757	-1.5896	-1.5542	Yes			4	12	b09 #09							No
	4	10	22b01 #05					-1.8325		No		Fig. 4C / plot	4	12	b09 #13	16.8713	11.8261	0	0	-3.5865	-3.5975	Yes
	6	10	22b03 #14							No		Fig. 4C / plot	3	12	b08 #13	3.35945	3.69881	0	0	-2.30016	-2.1333	Yes
	6	10	22b03 #15							No		Fig. 4C / plot	5	13	b03 #03	38.5424	29.7764	-7.98296	-7.78287	-2.2558	-2.355	Yes
												Fig. 4C / plot	4	13	b02 #11	27.0393	19.0501	0	-3.97763	-3.479	-3.3038	Yes
													3	13	b01 #01							No
												Fig. 4C / plot	3	13	b01 #02	7.91683	7.58065	0	0	-1.817	-1.8104	Yes
												Fig. 4C / plot	3	13	b01 #16	23.4796	16.8456	0	-3.31697	-3.4665	-3.1189	Yes
												Fig. 4C / plot	3	13	b01 #17	5.66806	4.89216	0	-2.03257	-2.3538	-2.3617	Yes
												Fig. 4C / plot	3	25	a22 #06	3.41665	5.04324	-1.04813	-0.33748	-2.013	-1.997	Yes
													3	25	a22 #07					-2.0538		No
													3	25	a21 #19							No
	P2X7(L341*)	oocytes rarely recover after 1st application											P2X7(L341*)	oocytes rarely recover after 1st application
				> 500 nm [ΔF/F%]		430-490 nm [ΔF/F%]		Current [µA]								470- 500 nm [ΔF/F%]		430-470 nm [ΔF/F%]		Current [µA]
Also used in	Expression time [days]	Oocyte batch	Recording	1st Application	2nd Application	1st Application	2nd Application	1st Application	2nd Application	inclusion criteria for analysis are met		Also used in	Expression time [days]	Oocyte batch	Recording	1st Application	2nd Application	1st Application	2nd Application	1st Application	2nd Application	inclusion criteria for analysis are met
	6	5	k08 #56							No			7	13	b05 #09	3.79816		3.1986		-3.419		No
Fig. 4B / plot	5	5	k07 #30	1.07216	1.26843	0.670643	0.99522	-1.3329	-1.4698	Yes			7	13	b05 #10	0.652073		0.341723		-1.7127		No
	5	5	k07 #32					no current		No			7	13	b05 #11	2.36431		1.68982		-2.059		No
	4	5	k06 #06					-1.849		No			6	13	b04 #00	1.41626		0.718482		-1.4142		No
Fig. 4B / plot	4	5	k06 #08	1.2587	1.75729	0.835312	1.70823	-1.0482	-1.0928	Yes			6	13	b04 #01	0.564269		0.430026		-2.1992		No
	4	5	k06 #09	0.223458		0.64744		-1.653		No			6	13	b04 #02							No
	4	5	k06 #34					no current		No			5	13	b03 #07	3.82415		2.71897		-3.1613		No
	3	5	k05 #02							No			5	13	b03 #11							No
	3	5	k05 #03					-1.2099	-1.0522	No			4	13	b02 #02							No
	3	5	k05 #04					-0.579	-0.5547	No			4	13	b02 #06	2.39811		2.55502		-1.7775		No
	3	5	k05 #09					-0.4639	-0.4469	No			3	13	b01 #04	2.859		1.88812		-1.9869		No
	3	5	k05 #28					-1.1793	-0.9831	No			3	13	b01 #05	2.97698		3.01542		-0.9745		No
	3	5	k05 #34					-0.3293	-0.3276	No			3	13	b01 #15							No
	2	5	k04 #14					-0.10703	-0.09732	No
	2	5	k04 #15					-0.2076	-0.1914	No
	4	4	k01 #25					-0.8888	-0.9573	No
	4	4	k01 #34					-2.3338		No
	3	4	j30 #10					-2.5226		No
	3	4	j30 #11					-0.93556	-1.0384	No
	3	4	j30 #12					-2.0676		No
	4	8	m07 #09					no current		No
	4	8	m07 #10					-0.746	-0.659	No
Fig. 4B / plot	4	8	m07 #15	4.24679	3.85893	3.85513	3.40389	-1.086	-1.106	Yes
	4	8	m07 #16					-0.616	-0.693	No
	6	8	m09 #03					-1.757	-1.677	No

## Sheet: C-terminus
	P2X7(N356*)												P2X7(N356*)
				> 500 nm [ΔF/F%]		430-490 nm [ΔF/F%]		Current [µA]								470- 500 nm [ΔF/F%]		430-470 nm [ΔF/F%]		Current [µA]
Also used in	Expression time [days]	Oocyte batch	Recording	1st Application	2nd Application	1st Application	2nd Application	1st Application	2nd Application	inclusion criteria for analysis are met		Also used in	Expression time [days]	Oocyte batch	Recording	1st Application	2nd Application	1st Application	2nd Application	1st Application	2nd Application	inclusion criteria for analysis are met
	7	7	j10 #26					-0.1654	-0.28387	No			4	14	d30 #11					-0.889	-0.8956	No
	7	7	j10 #27					no current		No			3	14	d29 #05					-1.1868	-1.1835	No
	6	7	j09 #29					no current		No			3	14	d29 #14					-1.0963	-1.2051	No
	6	7	j09 #32					no current		No
	6	7	j09 #33					no current		No
	5	7	j08 #33					no current		No
	5	7	j08 #34					-0.56115	-0.665	No
	5	7	j08 #35					-0.20117		No
	7	6	e03 #13					-0.5644	-0.63576	No
	7	6	e03 #14					-1.6545		No
	3	19	22a13 #03					-0.57903	-0.61797	No
	3	19	22a13 #04					-0.55799	-0.59687	No
	4	19	22a14 #26					-0.7868	-0.8597	No
	4	19	22a14 #27					-0.81102	-0.85476	No
	4	19	22a14 #31	0	0	0	0	-1.3377	-1.31094	Yes
	4	19	22a14 #32					-0.5012	-0.4769	No
	5	19	22a15 #03					-0.8158	-0.79314	No
	5	19	22a15 #04					-0.83692	-0.8807	No
	P2X7(T357*)												P2X7(T357*)
				> 500 nm [ΔF/F%]		430-490 nm [ΔF/F%]		Current [µA]								470- 500 nm [ΔF/F%]		430-470 nm [ΔF/F%]		Current [µA]
Also used in	Expression time [days]	Oocyte batch	Recording	1st Application	2nd Application	1st Application	2nd Application	1st Application	2nd Application	inclusion criteria for analysis are met		Also used in	Expression time [days]	Oocyte batch	Recording	1st Application	2nd Application	1st Application	2nd Application	1st Application	2nd Application	inclusion criteria for analysis are met
	3	19	22a13 #13					-0.532	-0.5304	No			8	11	d20 #06					no current		No
	3	19	22a13 #14							No			8	11	d20 #07					no current		No
	4	19	22a14 #20					-0.56124	-0.67155	No			8	11	d20 #08					-2.50732	-2.70867	No
	4	19	22a14 #21					-0.78175	-0.87095	No			8	11	d20 #09					-1.1969	-1.1338	No
	5	19	22a15 #07					-0.70227	-0.84834	No			7	11	d19 #07					no current		No
	5	19	22a15 #08					-0.49636	-0.54823	No			7	11	d19 #08					-0.933		No
													4	11	d16 #10					-0.3731		No
													3	11	d15 #03					-0.6147	-0.631	No
													3	11	d15 #05							No
													3	11	d15 #06							No
	P2X7(Y358*)												P2X7(Y358*)
				> 500 nm [ΔF/F%]		430-490 nm [ΔF/F%]		Current [µA]								470- 500 nm [ΔF/F%]		430-470 nm [ΔF/F%]		Current [µA]
Also used in	Expression time [days]	Oocyte batch	Recording	1st Application	2nd Application	1st Application	2nd Application	1st Application	2nd Application	inclusion criteria for analysis are met		Also used in	Expression time [days]	Oocyte batch	Recording	1st Application	2nd Application	1st Application	2nd Application	1st Application	2nd Application	inclusion criteria for analysis are met
	7	15	j03 #11					-2.2404	-2.3977	No			8	24	d27 #29					-1.732	-1.778	No
	7	15	j03 #12					-2.7171	-2.654	No			7	24	d26 #27	0	0	0	0	-1.294	-1.321	Yes
	7	15	j03 #13							No			4	24	d23 #11					-2.97	-2.902	No
	6	15	j02 #18					-2.5722		No			4	24	d23 #16					-1.7473	-1.7076	No
	6	15	j02 #19					-2.5088	-2.5544	No			3	24	d22 #19	0	0	0	0	-2.3077	-2.26932	Yes
	6	15	j02 #20	0	0	0	0	-2.4672	-2.4706	Yes			3	11	d19 #02					-1.9903		No
	6	15	j02 #21	0	0	0	0	-2.6994	-2.7652	Yes			3	11	d19 #13					-1.4326		No
	6	15	j02 #22	0	0	0	0	-2.8387	-2.602	Yes			3	11	d19 #15					-3.168		No
	5	15	j01 #01					-1.86643	-1.92005	No			3	11	d19 #16							No
	5	15	j01 #02					-1.4485	-1.5867	No			4	11	d16 #11					-0.9393		No
	5	15	j01 #03	0	0	0	0	-1.97867	-1.9576	Yes			4	11	d16 #12					-0.1232		No
	5	15	j01 #28	0	0	0	0	-2.6259	-2.6665	Yes			3	11	d15 #09					-0.6929	-0.7368	No
	4	15	h31 #02					-0.91283	-0.91283	No
	4	15	h31 #06					-2.08465	-2.07613	No
	4	15	h31 #07	0	0	0	0	-2.0808	-2.1203	Yes
	P2X7(A359*)												P2X7(A359*)
				> 500 nm [ΔF/F%]		430-490 nm [ΔF/F%]		Current [µA]								470- 500 nm [ΔF/F%]		430-470 nm [ΔF/F%]		Current [µA]
Also used in	Expression time [days]	Oocyte batch	Recording	1st Application	2nd Application	1st Application	2nd Application	1st Application	2nd Application	inclusion criteria for analysis are met		Also used in	Expression time [days]	Oocyte batch	Recording	1st Application	2nd Application	1st Application	2nd Application	1st Application	2nd Application	inclusion criteria for analysis are met
	3	19	22a13 #25					-0.1314	-0.1444	No			7	24	d26 #05	0	0	0	0	-2.0093	-2.1115	Yes
	3	19	22a13 #26					-0.29846	-0.27573	No			4	24	d23 #06					-1.5453	-1.5453	No
	4	19	22a14 #02					-0.7753	-0.7039	No			4	24	d23 #07					no current		No
	4	19	22a14 #03					-0.38274	-0.39418	No			4	24	d23 #08					-0.4071	-0.4087	No
	4	19	22a14 #04					-0.2401	-0.2465	No			3	24	d22 #09					-1.1148	-1.0512	No
	5	19	22a15 #05					-0.48826	-0.52067	No
	5	19	22a15 #06					-0.53847	-0.51256	No
	5	19	22a15 #09					-0.644	-0.678	No
	P2X7(T361*)												P2X7(T361*)
				> 500 nm [ΔF/F%]		430-490 nm [ΔF/F%]		Current [µA]								470- 500 nm [ΔF/F%]		430-470 nm [ΔF/F%]		Current [µA]
Also used in	Expression time [days]	Oocyte batch	Recording	1st Application	2nd Application	1st Application	2nd Application	1st Application	2nd Application	inclusion criteria for analysis are met		Also used in	Expression time [days]	Oocyte batch	Recording	1st Application	2nd Application	1st Application	2nd Application	1st Application	2nd Application	inclusion criteria for analysis are met
Fig. 5D / plot	7	7	j10 #11	-1.69713	-1.66736	0	0	-2.4981	-2.6037	Yes			7	12	b12 #01					-1.0364	-1.2181	No
	7	7	j10 #12					-2.7902		No			7	12	b12 #07					-2.5174	-2.8058	No
	7	7	j10 #21					no current		No			6	12	b11 #04					-1.6564	-2.1445	No
	7	7	j10 #22					-0.8105	-0.9444	No			6	12	b11 #05					-1.16	-1.5947	No
	6	7	j09 #24					-1.1804	-1.2422	No			6	12	b11 #07					-1.5427	-1.9387	No
Fig. 5D / plot	6	7	j09 #27	-1.10962	-1.29931	0	0	-2.3583	-2.3408	Yes			5	12	b10 #05					-2.92745	-3.2878	No
Fig. 5D / plot	6	7	j09 #28	0	0	0	0	-2.2899	-2.4925	Yes			5	12	b10 #12					-2.4005	-2.5889	No
	5	7	j08 #30					-1.3185	-1.3767	No			5	12	b10 #13	-2.26914	-2.02183	-0.879153	-0.569967	-3.14994	-3.3075	Yes
Fig. 5D / plot	5	7	j08 #31	0	0	0	0	-3.1284	-3.1274	Yes			4	12	b09 #05					-1.8423	-2.0047	No
	5	7	j08 #32					-1.1147	-1.2913	No			3	12	b08 #05					-0.1216	-0.1492	No
Fig. 5D / plot	4	19	22a19 #11	-0.59526	-0.72357	0	0	-1.1058	-1.0758	Yes
	4	19	22a19 #12					-1.0497	-1.0297	No
	4	19	22a19 #13					-1.7031	-1.7615	No
Fig. 5D / plot	5	19	22a20 #05	0	0	0	0	-1.4906	-1.434	Yes
Fig. 5D / plot	5	19	22a20 #06	0	0	0	0	-1.967	-1.9108	Yes
	5	19	22a20 #07					-0.9747	-0.97	No
Fig. 5D / plot	5	19	22a20 #29	-0.84477	-1.00193	0	0	-1.57483	-1.5621	Yes
	P2X7(R364*)												P2X7(R364*)
				> 500 nm [ΔF/F%]		430-490 nm [ΔF/F%]		Current [µA]								470- 500 nm [ΔF/F%]		430-470 nm [ΔF/F%]		Current [µA]
Also used in	Expression time [days]	Oocyte batch	Recording	1st Application	2nd Application	1st Application	2nd Application	1st Application	2nd Application	inclusion criteria for analysis are met		Also used in	Expression time [days]	Oocyte batch	Recording	1st Application	2nd Application	1st Application	2nd Application	1st Application	2nd Application	inclusion criteria for analysis are met
	3	22	22a10 #05					-0.70227	-0.69262	No
	3	22	22a10 #06					-0.5807	-0.5515	No
	4	22	22a11 #26					-0.36984	-0.40221	No
	4	22	22a11 #27					-1.24705		No
	4	22	22a11 #28					-0.12649	-0.08599	No
	5	22	22a12 #04					-1.0433	-0.98607	No
	5	22	22a12 #07					-0.55955	-0.50444	No
	5	22	22a12 #08					-1.26667	-1.13354	No
	5	22	22a12 #36					-1.12769	-1.08005	No
	P2X7(C371*)												P2X7(C371*)
				> 500 nm [ΔF/F%]		430-490 nm [ΔF/F%]		Current [µA]								470- 500 nm [ΔF/F%]		430-470 nm [ΔF/F%]		Current [µA]
Also used in	Expression time [days]	Oocyte batch	Recording	1st Application	2nd Application	1st Application	2nd Application	1st Application	2nd Application	inclusion criteria for analysis are met		Also used in	Expression time [days]	Oocyte batch	Recording	1st Application	2nd Application	1st Application	2nd Application	1st Application	2nd Application	inclusion criteria for analysis are met
	3	22	22a10 #19					-1.4093	-1.3886	No			7	12	b12 #02	0	0	0	0	-1.8976	-2.0862	Yes
	3	22	22a10 #20					-1.7854	-1.6349	No			7	12	b12 #08	0	0	0	0	-2.0279	-2.1299	Yes
	4	22	22a11 #09					-1.7597	-1.7935	No			6	12	b11 #03					-3.117	-3.131	No
	4	22	22a11 #10					-1.42527	-1.46486	No			5	12	b10 #04							No
	4	22	22a11 #11					-0.94725	-0.96836	No			5	12	b10 #17							No
	5	22	22a12 #23	0	0	0	0	-1.93524	-1.96424	Yes			4	12	b09 #06	0	0	0	0	-1.8461	-1.8811	Yes
	5	22	22a12 #24					-1.1681	-1.1079	No			3	12	b08 #06							No
	5	22	22a12 #25					-2.78518	-2.83065	No
	P2X7(A378*)												P2X7(A378*)
				> 500 nm [ΔF/F%]		430-490 nm [ΔF/F%]		Current [µA]								470- 500 nm [ΔF/F%]		430-470 nm [ΔF/F%]		Current [µA]
Also used in	Expression time [days]	Oocyte batch	Recording	1st Application	2nd Application	1st Application	2nd Application	1st Application	2nd Application	inclusion criteria for analysis are met		Also used in	Expression time [days]	Oocyte batch	Recording	1st Application	2nd Application	1st Application	2nd Application	1st Application	2nd Application	inclusion criteria for analysis are met
													9	24	d28 #15					-1.6138	-1.7537	No
													7	24	d26 #08					-0.26602	-0.30651	No
													4	24	d23 #02					-0.2385	-0.2351	No
													4	24	d23 #03					-0.923	-0.7918	No
													3	24	d22 #04					-0.2027	-0.1768	No
	P2X7(R385*)												P2X7(R385*)
				> 500 nm [ΔF/F%]		430-490 nm [ΔF/F%]		Current [µA]								470- 500 nm [ΔF/F%]		430-470 nm [ΔF/F%]		Current [µA]
Also used in	Expression time [days]	Oocyte batch	Recording	1st Application	2nd Application	1st Application	2nd Application	1st Application	2nd Application	inclusion criteria for analysis are met		Also used in	Expression time [days]	Oocyte batch	Recording	1st Application	2nd Application	1st Application	2nd Application	1st Application	2nd Application	inclusion criteria for analysis are met
	3	22	22a10 #13					no current		No
	3	22	22a10 #14					no current		No
	4	22	22a11 #14					-0.4331	-0.4071	No
	4	22	22a11 #15					-0.1492	-0.1168	No
	4	22	22a11 #29					-1.07386	-1.04286	No
	5	22	22a12 #15					-1.6613	-1.6329	No
	5	22	22a12 #16					-1.91207	-1.79586	No
	5	22	22a12 #32					-0.72339	-0.72339	No
	P2X7(K387*)												P2X7(K387*)
				> 500 nm [ΔF/F%]		430-490 nm [ΔF/F%]		Current [µA]								470- 500 nm [ΔF/F%]		430-470 nm [ΔF/F%]		Current [µA]
Also used in	Expression time [days]	Oocyte batch	Recording	1st Application	2nd Application	1st Application	2nd Application	1st Application	2nd Application	inclusion criteria for analysis are met		Also used in	Expression time [days]	Oocyte batch	Recording	1st Application	2nd Application	1st Application	2nd Application	1st Application	2nd Application	inclusion criteria for analysis are met
	3	22	22a10 #23					no current		No			4	18	b26 #09					no current		No
	3	22	22a10 #24					no current		No			3	18	b25 #12					no current		No
	4	22	22a11 #04					-0.1103	-0.1021	No
	4	22	22a11 #05					-0.1136	-0.1054	No
	4	22	22a11 #06					-0.1168	-0.107	No
	P2X7(C388*)												P2X7(C388*)
				> 500 nm [ΔF/F%]		430-490 nm [ΔF/F%]		Current [µA]								470- 500 nm [ΔF/F%]		430-470 nm [ΔF/F%]		Current [µA]
Also used in	Expression time [days]	Oocyte batch	Recording	1st Application	2nd Application	1st Application	2nd Application	1st Application	2nd Application	inclusion criteria for analysis are met		Also used in	Expression time [days]	Oocyte batch	Recording	1st Application	2nd Application	1st Application	2nd Application	1st Application	2nd Application	inclusion criteria for analysis are met
	3	22	22a10 #15					-0.11195	-0.11028	No			4	18	b26 #08					no current		No
	3	22	22a10 #16					no current		No			3	18	b25 #11					no current		No
	4	22	22a11 #12					-0.3715	-0.44932	No
	4	22	22a11 #13					-0.0795	-0.1055	No
	P2X7(V392*)												P2X7(V392*)
				> 500 nm [ΔF/F%]		430-490 nm [ΔF/F%]		Current [µA]								470- 500 nm [ΔF/F%]		430-470 nm [ΔF/F%]		Current [µA]
Also used in	Expression time [days]	Oocyte batch	Recording	1st Application	2nd Application	1st Application	2nd Application	1st Application	2nd Application	inclusion criteria for analysis are met		Also used in	Expression time [days]	Oocyte batch	Recording	1st Application	2nd Application	1st Application	2nd Application	1st Application	2nd Application	inclusion criteria for analysis are met
	3	22	22a10 #21					-0.24812	-0.36165	No			7	12	b12 #04					-2.78535		No
	3	22	22a10 #22					no current		No			7	12	b12 #09					-2.7076	-2.6973	No
	4	22	22a11 #07					-1.70656	-1.66267	No			6	12	b11 #01					-2.7683	-2.9118	No
	4	22	22a11 #08					-1.5944	-1.6206	No			6	12	b11 #14					-1.7794	-1.9774	No
	5	22	22a12 #26					-1.476	-1.45021	No			5	12	b10 # 06					-3.2258	-3.1696	No
	5	22	22a12 #27	0	0	0	0	-1.614	-1.5623	Yes			5	12	b10 # 09					-2.5209	-2.2412	No
	5	22	22a12 #28					-1.4288	-1.3106	No			4	12	b09 #01					-1.3461	-1.084	No
	5	22	22a12 #29					-0.7056	-0.62773	No			4	12	b09 #18					-2.84783	-2.8649	No
													3	12	b08 #04					-0.16057	-0.22055	No
	P2X7(E406*)												P2X7(E406*)
				> 500 nm [ΔF/F%]		430-490 nm [ΔF/F%]		Current [µA]								470- 500 nm [ΔF/F%]		430-470 nm [ΔF/F%]		Current [µA]
Also used in	Expression time [days]	Oocyte batch	Recording	1st Application	2nd Application	1st Application	2nd Application	1st Application	2nd Application	inclusion criteria for analysis are met		Also used in	Expression time [days]	Oocyte batch	Recording	1st Application	2nd Application	1st Application	2nd Application	1st Application	2nd Application	inclusion criteria for analysis are met
	6	3	h26 #19					-0.8206	-0.7575	No			4	14	d30 #01					-1.8641	-1.5543	No
	6	3	h26 #41					-0.5547	-0.3877	No			4	14	d30 #02					-1.1301	-0.9298	No
	5	3	h25 #18					-0.9019	-0.813	No			3	14	d29 #03					-0.8867	-0.94399	No
	5	3	h25 #19					-0.26437		No			3	14	d29 #09					-0.42491	-0.41685	No
	5	3	h25 #20					-0.2563	-0.3423	No			2	14	d28 #16					-1.00365	-1.09491	No
	4	3	h24 #04					-0.24981	-0.23681	No
	4	3	h24 #05					-0.4639		No
	7	6	e03 #15					-2.3176		No
	P2X7(Q422*)												P2X7(Q422*)
				> 500 nm [ΔF/F%]		430-490 nm [ΔF/F%]		Current [µA]								470- 500 nm [ΔF/F%]		430-470 nm [ΔF/F%]		Current [µA]
Also used in	Expression time [days]	Oocyte batch	Recording	1st Application	2nd Application	1st Application	2nd Application	1st Application	2nd Application	inclusion criteria for analysis are met		Also used in	Expression time [days]	Oocyte batch	Recording	1st Application	2nd Application	1st Application	2nd Application	1st Application	2nd Application	inclusion criteria for analysis are met
	3	19	22a13 #15					no current		No			4	18	b26 #04					no current		No
	3	19	22a13 #16					-0.28384	-0.30492	No			3	18	b25 #13					no current		No
	4	19	22a14 #18					-0.13789	-0.18485	No
	4	19	22a14 #19					no current		No
	P2X7(D423*)												P2X7(D423*)
				> 500 nm [ΔF/F%]		430-490 nm [ΔF/F%]		Current [µA]								470- 500 nm [ΔF/F%]		430-470 nm [ΔF/F%]		Current [µA]
Also used in	Expression time [days]	Oocyte batch	Recording	1st Application	2nd Application	1st Application	2nd Application	1st Application	2nd Application	inclusion criteria for analysis are met		Also used in	Expression time [days]	Oocyte batch	Recording	1st Application	2nd Application	1st Application	2nd Application	1st Application	2nd Application	inclusion criteria for analysis are met
	7	7	j10 #08					-1.622	-1.731	No			6	11	d22 #10	0	0	0	0	-4.1798	-4.203	Yes
	7	7	j10 #24							No			6	11	d22 #12							No
	7	7	j10 #25					-1.3268	-1.031	No			6	11	d22 #13					-0.1022		No
	6	7	j09 #06					-2.4571	-2.1788	No			6	11	d22# 23					-1.5245	-1.5591	No
	6	7	j09 #08					-2.2273	-1.9985	No			4	11	d20 #00							No
	6	7	j09 #09							No			4	11	d20 #01	0	0	0	0	-2.29984	-2.21535	Yes
	6	7	j09 #11					-1.849	-1.664	No			4	11	d20 #02					-1.65286	-1.83586	No
	5	7	j08 #10					-2.266	-2.149	No			3	11	d19 #04					-0.7315		No
	5	7	j08 #11					-2.40178	-2.46091	No			4	18	b26 #03					-0.751	-0.8012	No
	5	7	j08 #12					-2.45438	-2.488	No			3	18	b25 #15					-1.401	-1.3969	No
Fig. 5D / plot	5	7	j08 #18	0	0	0	0	-1.5522	-1.5421	Yes
	5	7	j08 #42					-1.358	-1.3932	No
	7	15	j03 # 01					-2.83	-2.628	No
	7	15	j03 #02					-2.8818	-2.6128	No
	7	15	j03 #03							No
	7	15	j03 #04							No
Fig. 5D / plot	7	15	j03 #05	0	0	0	0	-2.9633	-2.9844	Yes
	6	15	j02 #11					-1.982	-1.7973	No
Fig. 5D / plot	6	15	j02 #12	0.581933	0.464122	0	0.134184	-2.113	-2.1625	Yes
	6	15	j02 #13							No
Fig. 5D / plot	6	15	j02 #14	0	0.222196	0	0.108342	-2.4606	-2.5236	Yes
Fig. 5D / plot	6	15	j02 #24	0	0.618097	0	0.55016	-2.23662	-2.21724	Yes
	6	15	j02 #26					-2.7415	-2.426	No
Fig. 5D / plot	5	15	j01 #09	0	0	0	0	-2.6767	-2.6523	Yes
	5	15	j01 #10					-1.8632	-1.951	No
	5	15	j01 #11					-2.4524		No
	5	15	j01 #16					-1.945		No
	4	15	h31 #12					-2.16338	-2.10713	No
Fig. 5D / plot	4	15	h31 #13	0	0	0	0	-1.4161	-1.3025	Yes
	7	3	h27 #01					-2.1763	-2.1313	No
	7	3	h27 #02					-1.3903	-1.4829	No
Fig. 5D / plot	7	3	h27 #03	0	0	0	0	-2.1946	-2.2387	Yes
Fig. 5D / plot	7	3	h27 #04	0	0	0	0	-2.57913	-2.548	Yes
	7	3	h27 #05							No
Fig. 5D / plot	6	3	h26 # 31	0	0.43279	0	0.26023	-2.5559	-2.6378	Yes
Fig. 5D / plot	6	3	h26 #32	0.148886	0.424411	0.304539	0.421932	-2.03572	-2.05	Yes
	6	3	h26 #34					-2.5722	-2.548	No
Fig. 5D / plot	6	3	h26 # 48	0.234674	0.561198	0.218533	0.412599	-2.05805	-2.06029	Yes
Fig. 5D / plot	5	3	h25 #08	0	0	0	0	-1.5847	-1.4924	Yes
	5	3	h25 #09					-1.38969	-1.38467	No
Fig. 5D / plot	4	3	h24 #24	0	0.175201	0	0.179341	-2.77329	-2.76918	Yes
	4	3	h24 #25					-2.8462	-2.7799	No
Fig. 5D / plot	3	21	22a18 #21	0	0	0	0.120557	-3.2242	-3.2993	Yes
Fig. 5D / plot	3	21	22a18 #22	1.02786	1.01132	0.9781	0.938822	-2.1542	-2.0392	Yes
	3	21	22a18 #23					-1.1079	-1.0476	No
Fig. 5D / plot	3	21	22a18 #24	0	0.15055	0	0.11766	-2.405	-2.37969	Yes
	3	19	22a18 #25					-0.6699	-0.6395	No
Fig. 5D / plot	3	19	22a18 #26	0	0	0	0	-0.8755	-0.8096	Yes
	4	19	22a19 #03					-0.8674	-0.8222	No
Fig. 5D / plot	4	19	22a19 #10	0	0	0	0.25666	-0.94265	-0.89368	Yes
	4	19	22a19 #32					-0.7557	-0.6792	No
Fig. 5D / plot	5	19	22a20 #15	0	0	0	0	-1.3271	-1.2476	Yes
	5	19	22a20 #16					-0.6603	-0.585	No
Fig. 5D / plot	5	19	22a20 #17	0	0	0	0	-2.0161	-1.9937	Yes
Fig. 5D / plot	5	19	22a20 #18	0	0	0	0	-1.278	-1.2088	Yes
	P2X7(V424*)												P2X7(V424*)
				> 500 nm [ΔF/F%]		430-490 nm [ΔF/F%]		Current [µA]								470- 500 nm [ΔF/F%]		430-470 nm [ΔF/F%]		Current [µA]
Also used in	Expression time [days]	Oocyte batch	Recording	1st Application	2nd Application	1st Application	2nd Application	1st Application	2nd Application	inclusion criteria for analysis are met		Also used in	Expression time [days]	Oocyte batch	Recording	1st Application	2nd Application	1st Application	2nd Application	1st Application	2nd Application	inclusion criteria for analysis are met
	3	19	22a13 #08					-0.1444	-0.15569	No			4	18	b26 #02					no current		No
	3	19	22a13 #09					no current		No			3	18	b25 #10					no current		No
	4	19	22a14 #24					-0.39247	-0.47683	No
	4	19	22a14 #25					-0.19306	-0.19787	No
	P2X7(Q433*)												P2X7(Q433*)
				> 500 nm [ΔF/F%]		430-490 nm [ΔF/F%]		Current [µA]								470- 500 nm [ΔF/F%]		430-470 nm [ΔF/F%]		Current [µA]
Also used in	Expression time [days]	Oocyte batch	Recording	1st Application	2nd Application	1st Application	2nd Application	1st Application	2nd Application	inclusion criteria for analysis are met		Also used in	Expression time [days]	Oocyte batch	Recording	1st Application	2nd Application	1st Application	2nd Application	1st Application	2nd Application	inclusion criteria for analysis are met
													6	16	b26 #36					-2.0489	-2.0856	No
													6	16	b26 #37					-1.8358	-1.7172	No
													6	16	b26 #38					-0.8452	-1.0019	No
													5	16	b25 #21					-0.3667	-0.2611	No
													4	16	b24 #01					-1.6143	-1.4065	No
													3	16	b23 #02					-0.9278	-0.4509	No
	P2X7(T434*)												P2X7(T434*)
				> 500 nm [ΔF/F%]		430-490 nm [ΔF/F%]		Current [µA]								470- 500 nm [ΔF/F%]		430-470 nm [ΔF/F%]		Current [µA]
Also used in	Expression time [days]	Oocyte batch	Recording	1st Application	2nd Application	1st Application	2nd Application	1st Application	2nd Application	inclusion criteria for analysis are met		Also used in	Expression time [days]	Oocyte batch	Recording	1st Application	2nd Application	1st Application	2nd Application	1st Application	2nd Application	inclusion criteria for analysis are met
													6	16	b26 #20					no current		No
													6	16	b26 #21					-1.1309	-1.1172	No
													5	16	b25 #22					-0.506	-0.3828	No
													4	16	b24 #09					-1.76134	-1.74475	No
													3	16	b23 #01					-0.9947	-0.8288	No
	P2X7(F436*)												P2X7(F436*)
				> 500 nm [ΔF/F%]		430-490 nm [ΔF/F%]		Current [µA]								470- 500 nm [ΔF/F%]		430-470 nm [ΔF/F%]		Current [µA]
Also used in	Expression time [days]	Oocyte batch	Recording	1st Application	2nd Application	1st Application	2nd Application	1st Application	2nd Application	inclusion criteria for analysis are met		Also used in	Expression time [days]	Oocyte batch	Recording	1st Application	2nd Application	1st Application	2nd Application	1st Application	2nd Application	inclusion criteria for analysis are met
	3	22	22a10 #09					-1.29467	-1.25513	No
	3	22	22a10 #10					-1.5196	-1.3514	No
	4	22	22a11 #19					-0.9086	-0.8339	No
	4	22	22a11 #20					-2.06607	-2.0601	No
	4	22	22a11 #21	0	0	0	0	-1.9074	-1.8406	Yes
	4	22	22a11 #22					-0.81909	-0.67638	No
	4	22	22a11 #36					-1.91021	-1.8522	No
	5	22	22a12 #12					-1.94951	-1.8376	No
	5	22	22a12 #13					-2.70202	-2.63391	No
	5	22	22a12 #35	0	0	0	0	-2.0471	-1.9304	Yes
	3	19	22a18 #27					-0.3147	-0.1882	No
	4	19	22a19 #06					-0.61146	-0.6245	No
	4	19	22a19 #07					-0.59847	-0.48986	No
	4	19	22a19 #31					-1.2605	-1.0563	No
	5	19	22a20 #08					-1.6265	-1.5007	No
	5	19	22a20 #09					-0.9749	-0.8576	No
	5	19	22a20 #10					-1.1839	-1.0198	No
	5	19	22a20 #32					-0.5937	-0.6473	No
	5	19	22a20 #45					-1.0997	-0.9972	No
	P2X7(S445*)												P2X7(S445*)
				> 500 nm [ΔF/F%]		430-490 nm [ΔF/F%]		Current [µA]								470- 500 nm [ΔF/F%]		430-470 nm [ΔF/F%]		Current [µA]
Also used in	Expression time [days]	Oocyte batch	Recording	1st Application	2nd Application	1st Application	2nd Application	1st Application	2nd Application	inclusion criteria for analysis are met		Also used in	Expression time [days]	Oocyte batch	Recording	1st Application	2nd Application	1st Application	2nd Application	1st Application	2nd Application	inclusion criteria for analysis are met
	3	19	22a13 #05					-0.89693	-0.80291	No			7	25	a26 #11					-1.698	-1.9978	No
	3	19	22a13 #06					-1.75316	-1.63778	No			5	25	a24 #10	0	0	0	0	-2.75724	-2.72478	Yes
	3	19	22a13 #07	0	0	0	0	-1.9695	-1.9657	Yes			4	25	a23 #07	0	0	0	0	-1.44146	-1.49184	Yes
	4	19	22a14 #28	0.650696	0.141833	0.0176907	0.0857597	-1.4242	-1.34672	Yes
	4	19	22a14 #29	0.47164	0.112051	0.0826656	0.0986619	-1.84294	-1.79356	Yes
	P2X7(P450*)												P2X7(P450*)
				> 500 nm [ΔF/F%]		430-490 nm [ΔF/F%]		Current [µA]								470- 500 nm [ΔF/F%]		430-470 nm [ΔF/F%]		Current [µA]
Also used in	Expression time [days]	Oocyte batch	Recording	1st Application	2nd Application	1st Application	2nd Application	1st Application	2nd Application	inclusion criteria for analysis are met		Also used in	Expression time [days]	Oocyte batch	Recording	1st Application	2nd Application	1st Application	2nd Application	1st Application	2nd Application	inclusion criteria for analysis are met
	5	5	k07 #38					-0.10538	-0.11029	No			7	25	a26 #12					-2.1327	-3.2733	No
	5	5	k07 #39					no current		No			5	25	a24 #03					-2.3825	-2.2515	No
	4	5	k06 #07					-1.52802	-1.4294	No			5	25	a24 #11					-2.6971	-2.9556	No
	4	5	k06 #15					-0.66822	-0.5125	No			4	25	a23 #02	0	0	0	0	-1.83244	-1.70643	Yes
	3	5	k05 #31					-0.9517	-0.7833	No			3	25	a22 #10	0	0	0	0	-1.8153	-1.8705	Yes
	3	5	k05 #36					-0.36978	-0.31954	No			3	25	a22 #11	0	0	0	0	-1.82351	-1.6835	Yes
	7	3	h27 #06					-2.19745	-2.19	No
	7	3	h27 #07					-1.8507	-1.613	No
	6	3	h26 #07					-2.19745	-2.19	No
	6	3	h26 #08					-1.8507	-1.613	No
	5	3	h25 #14	0	0	0	0	-2.392	-2.4104	Yes
	5	3	h25 #15	0.21898	0.425616	0.27198	0.105443	-2.6634	-2.5875	Yes
	4	3	h24 #20	0	0	0	0	-2.4782	-2.4958	Yes
	4	3	h24 #22	0	0	0	0	-1.2827	-1.2656	Yes
	P2X7(Q455*)												P2X7(Q455*)
				> 500 nm [ΔF/F%]		430-490 nm [ΔF/F%]		Current [µA]								470- 500 nm [ΔF/F%]		430-470 nm [ΔF/F%]		Current [µA]
Also used in	Expression time [days]	Oocyte batch	Recording	1st Application	2nd Application	1st Application	2nd Application	1st Application	2nd Application	inclusion criteria for analysis are met		Also used in	Expression time [days]	Oocyte batch	Recording	1st Application	2nd Application	1st Application	2nd Application	1st Application	2nd Application	inclusion criteria for analysis are met
	6	5	k08 #51					-0.7753	-0.8478	No			4	11	d20 #03							No
	5	5	k07 #23							No			4	11	d20 #04							No
	5	5	k07 #31							No			4	11	d20 #05	0	0	0	0	-1.7489	-1.7941	Yes
	5	5	k07 #33					-1.103	-0.754	No			3	11	d19 #03					-1.9643		No
	4	5	k06 #21							No			3	11	d19 #14					-2.0029		No
	4	5	k06 #22					no current		No			7	13	b05 #02	0	0	0	0	-2.4202	-2.402	Yes
	4	5	k06 #57					-1.39769	-1.1844	No			7	13	b05 #17					-1.1305	-0.8629	No
	3	5	k05 #29							No			4	13	b02 #14					-4.2287	-4.3014	No
	3	5	k05 #30							No			7	25	a26 #08	0	0	0	0	-3.1724	-3.3312	Yes
	2	5	k04 #23					no current		No			7	25	a26 #15					-2.1244		No
	7	7	j10 #15					-3.0377	-2.551	No			5	25	a24 #01					-2.6423	-2.3206	No
	7	7	j10 #16					-2.2298	-1.698	No			5	25	a24 #13					-1.9369	-1.7504	No
	7	7	j10 #17	0	0	0	0	-2.2857	-2.2402	Yes			4	25	a23 #03					-2.65554	-2.2934	No
	7	7	j10 #18	0	0	0	0	-2.3953	-2.4231	Yes
	6	7	j09 #22					-1.2761	-1.3073	No
	6	7	j09 #23							No
	6	7	j09 #26							No
	5	7	j08 #03					-1.6053	-1.7208	No
	5	7	j08 #09					-2.7444	-2.7967	No
	5	7	j08 #19					-1.5064	-1.6069	No
	12	15	j08 #48							No
	5	7	j08 #52	0	0	0	0	-2.5583	-2.492	Yes
	7	15	j03 #06	0	0	0	0	-2.9115	-2.9467	Yes
	7	15	j03 #07	0	0	0	0	-3.5506	-3.6353	Yes
	7	15	j03 #08	0.770663	1.11296	0.0414698	0.507499	-3.13732	-3.23896	Yes
	7	15	j03 #09					-1.6523	-1.8814	No
	7	15	j03 #10		0.7733		0.312358	-3.15656	-3.2054	Yes
	7	15	j03 #14	0	0	0	0	-3.351	-3.286	Yes
	6	15	j02 #01	0	0	0	0	-2.6632	-2.709	Yes
	6	15	j02 #02	0	0	0	0	-2.6053	-2.5756	Yes
	6	15	j02 #03					-2.632	-2.3503	No
	6	15	j02 #04	0	0	0	0	-2.28824	-2.29049	Yes
	5	15	j01 #13					-3.5265	-3.6134	No
	5	15	j01 #14					-3.2411	-3.3605	No
	5	15	j01 #15	0	0	0	0	-3.58	-3.6593	Yes
	5	15	j01 #27	0	0	0	0	-2.3417	-2.4342	Yes
	4	15	h31 #10					-1.7062	-1.8279	No
	4	15	h31 #11					-1.698	-1.8717	No
	4	19	22a19 #27	0	0	0	0	-1.7173	-1.6332	Yes
	4	19	22a19 #28					-2.3256	-2.33443	No
	5	19	22a20 #38					-1.0525	-1.1643	No
	P2X7(Q460*)												P2X7(Q460*)
				> 500 nm [ΔF/F%]		430-490 nm [ΔF/F%]		Current [µA]								470- 500 nm [ΔF/F%]		430-470 nm [ΔF/F%]		Current [µA]
Also used in	Expression time [days]	Oocyte batch	Recording	1st Application	2nd Application	1st Application	2nd Application	1st Application	2nd Application	inclusion criteria for analysis are met		Also used in	Expression time [days]	Oocyte batch	Recording	1st Application	2nd Application	1st Application	2nd Application	1st Application	2nd Application	inclusion criteria for analysis are met
	4	19	22a19 #08					-0.3795	-0.3844	No			7	25	a26 #09					-1.3052	-1.4439	No
	4	19	22a19 #09					-1.064	-1.0978	No			5	25	a24 #07					1.966	1.639	No
	4	19	22a19 #36					-2.006		No			5	25	a24 #14							No
	5	19	22a20 #11	0	0	0	0	-1.62683	-1.5118	Yes			4	25	a23 #06					-1.07507	-1.25983	No
	5	19	22a20 #12					-0.5255	-0.4882	No			3	25	a22 #12					-0.8337	-0.89861	No
	5	19	22a20 #13					-0.3293	-0.3358	No
	5	19	22a20 #14	0	0	0	0	-1.1924	-1.0336	Yes
	5	19	22a20 #35					-0.3536	-0.3033	No
	P2X7(E465*)												P2X7(E465*)
				> 500 nm [ΔF/F%]		430-490 nm [ΔF/F%]		Current [µA]								470- 500 nm [ΔF/F%]		430-470 nm [ΔF/F%]		Current [µA]
Also used in	Expression time [days]	Oocyte batch	Recording	1st Application	2nd Application	1st Application	2nd Application	1st Application	2nd Application	inclusion criteria for analysis are met		Also used in	Expression time [days]	Oocyte batch	Recording	1st Application	2nd Application	1st Application	2nd Application	1st Application	2nd Application	inclusion criteria for analysis are met
													7	25	a26 #10					-0.92456	-0.9051	No
													5	25	a24 #05					-1.08207	-1.1129	No
													5	25	a24 #08					-0.6521	-0.6196	No
													5	25	a24 #15					-1.24583	-1.08711	No
													4	25	a23 #04					-0.97175	-0.95505	No
													3	25	a22 #09					-0.29357	-0.2271	No
	P2X7(S470*)												P2X7(S470*)
				> 500 nm [ΔF/F%]		430-490 nm [ΔF/F%]		Current [µA]								470- 500 nm [ΔF/F%]		430-470 nm [ΔF/F%]		Current [µA]
Also used in	Expression time [days]	Oocyte batch	Recording	1st Application	2nd Application	1st Application	2nd Application	1st Application	2nd Application	inclusion criteria for analysis are met		Also used in	Expression time [days]	Oocyte batch	Recording	1st Application	2nd Application	1st Application	2nd Application	1st Application	2nd Application	inclusion criteria for analysis are met
													7	25	a26 #14					-2.1424	-2.4633	No
													5	25	a24 #06					-0.4769	-0.5255	No
													5	25	a24 #09					-1.1366	-1.1464	No
													4	25	a23 #01					-0.6099	-0.7526	No
													4	25	a23 #09					-0.5045	-0.6196	No
													3	25	a22 #08					-0.29195	-0.37629	No
	P2X7(E489*)												P2X7(E489*)
				> 500 nm [ΔF/F%]		430-490 nm [ΔF/F%]		Current [µA]								470- 500 nm [ΔF/F%]		430-470 nm [ΔF/F%]		Current [µA]
Also used in	Expression time [days]	Oocyte batch	Recording	1st Application	2nd Application	1st Application	2nd Application	1st Application	2nd Application	inclusion criteria for analysis are met		Also used in	Expression time [days]	Oocyte batch	Recording	1st Application	2nd Application	1st Application	2nd Application	1st Application	2nd Application	inclusion criteria for analysis are met
	12	15	j08# 49					-2.454		No			6	16	b26 #30	-4.63566	-1.49059	-2.43419	-0.510541	-2.5452	-2.5469	Yes
	7	15	j03 #15							No			6	16	b26 #31	-1.77409	-0.802909	-0.618353	-0.516665	-3.27313	-3.38027	Yes
	6	15	j02 #05					-1.7537	-1.8194	No			5	16	b25 #00	0	0	0	0	-1.79238	-1.93524	Yes
	6	15	j02 #06					-1.6073	-1.7045	No			5	16	b25 #17	0	0	0	0	-1.68	-1.468	Yes
	6	15	j02 #07	0	0	0	0	-2.96994	-2.8957	Yes			4	16	b24 #05					-1.6216	-1.7805	No
	6	15	j02 #25					-1.1594	-1.2307	No			4	16	b24 #23					-1.1905		No
	5	15	j01 #17					-3.15169	-3.2581	No			3	16	b23 #06					-0.9799	-0.92454	No
	5	15	j01 #18					-3.0254	-2.9857	No			3	16	b23 #25					-1.37332	-1.02665	No
	5	15	j01 #20	0	0	0	0	-3.44191	-3.48234	Yes
	4	15	h31 #08	0	0	0	0	-1.48702	-1.38678	Yes
	4	15	h31 #09					-1.49733	-1.37008	No
	P2X7(N490*)												P2X7(N490*)
				> 500 nm [ΔF/F%]		430-490 nm [ΔF/F%]		Current [µA]								470- 500 nm [ΔF/F%]		430-470 nm [ΔF/F%]		Current [µA]
Also used in	Expression time [days]	Oocyte batch	Recording	1st Application	2nd Application	1st Application	2nd Application	1st Application	2nd Application	inclusion criteria for analysis are met		Also used in	Expression time [days]	Oocyte batch	Recording	1st Application	2nd Application	1st Application	2nd Application	1st Application	2nd Application	inclusion criteria for analysis are met
	4	19	22a19 #04					-0.70065	-0.77694	No			6	16	b26 #32	0	0	0	0	-2.58072	-2.6338	Yes
	4	19	22a19 #05	0	0	0	0	-2.2251	-2.1438	Yes			6	16	b26 #35	0	0	0	0	-2.4263	-2.51562	Yes
	4	19	22a19 #33	0	0	0	0	-2.0309	-1.9452	Yes			5	16	b25 #18					-1.459	-1.275	No
	5	19	22a20 #22					-0.7899	-0.7784	No			4	16	b24 #03					-1.06405	-1.17591	No
	5	19	22a20 #23	0	0	0	0	-2.2367	-2.0976	Yes			4	16	b24 #22					-1.7014	-1.6418	No
	5	19	22a20 #24					-0.7672	-0.7672	No			3	16	b23 #04					-1.2209	-1.1253	No
	5	19	22a20 #25					-1.0119	-0.8989	No
	P2X7(V517*)												P2X7(V517*)
				> 500 nm [ΔF/F%]		430-490 nm [ΔF/F%]		Current [µA]								470- 500 nm [ΔF/F%]		430-470 nm [ΔF/F%]		Current [µA]
Also used in	Expression time [days]	Oocyte batch	Recording	1st Application	2nd Application	1st Application	2nd Application	1st Application	2nd Application	inclusion criteria for analysis are met		Also used in	Expression time [days]	Oocyte batch	Recording	1st Application	2nd Application	1st Application	2nd Application	1st Application	2nd Application	inclusion criteria for analysis are met
	5	5	k07 #43					no current		No
	4	5	k06 #51					-0.14593		No
	3	5	k05 #12					no current		No
	3	5	k05 #27					no current		No
	2	5	k04 #24					no current		No
	5	17	j22 #01	0	0	0	0	-2.8056	-2.8225	Yes
	5	17	j22 #05	0	0	0	0	-1.951	-1.857	Yes
	4	17	j21 #02					-0.66826	-0.59368	No
	4	17	j21 #03					-1.5633	-1.1128	No
	4	17	j21 #23					-0.6196	-0.6618	No
	3	19	22a13 #10	0	0	0	0	-0.9879	-0.9571	Yes
	3	19	22a13 #11					-1.413	-1.3982	No
	3	19	22a13 #12	0.220493	0.00440673	0.103728	0.0130623	-2.67124	-2.56086	Yes
	4	19	22a14 #22	0	0	0	0	-1.0572	-1.0106	Yes
	4	19	22a14 #23	0	0	0	0	-1.49716	-1.46113	Yes
	P2X7(L523*)												P2X7(L523*)
				> 500 nm [ΔF/F%]		430-490 nm [ΔF/F%]		Current [µA]								470- 500 nm [ΔF/F%]		430-470 nm [ΔF/F%]		Current [µA]
Also used in	Expression time [days]	Oocyte batch	Recording	1st Application	2nd Application	1st Application	2nd Application	1st Application	2nd Application	inclusion criteria for analysis are met		Also used in	Expression time [days]	Oocyte batch	Recording	1st Application	2nd Application	1st Application	2nd Application	1st Application	2nd Application	inclusion criteria for analysis are met
	3	22	22a10 #07					-0.78183	-0.81906	No
	3	22	22a10 #08					-1.03451	-1.19513	No
	4	22	22a11 #23					-1.67672	-1.66443	No
	4	22	22a11 #24					-1.3346	-1.3539	No
	4	22	22a11 #25					-0.9729	-0.9338	No
	5	22	22a12 #09	0	0	0	0	-2.5171	-2.5515	Yes
	5	22	22a12 #10					-2.2203	-2.1585	No
	5	22	22a12 #11					-1.0035	-0.92634	No
	5	22	22a12 #34					-2.41786	-2.37173	No
	6	22	22a13 #32					-1.68665	-1.63365	No
	6	22	22a13 #33		0.561679		0.218304	-1.5038	-1.4209	Yes
	4	19	22a19 #18	0	0	0	0	-2.43765	-2.46727	Yes
	4	19	22a19 #19					-1.05389	-0.93101	No
	4	19	22a19 #29					-1.90769	-1.86391	No
	4	19	22a19 #34	0.972988	0.437301	0.468447	0.0708694	-2.303	-2.1979	Yes
	4	19	22a19 #35					-1.121		No
	5	19	22a20 #19					-0.6909	-0.7072	No
	5	19	22a20 #20					-0.6033	-0.5709	No
	5	19	22a20 #21	0	0	0	0	-0.929	-0.85474	Yes
	5	19	22a20 #34					-1.27289	-1.2114	No
	5	19	22a20 #46					-0.49305		No
	P2X7(L527*)												P2X7(L527*)
				> 500 nm [ΔF/F%]		430-490 nm [ΔF/F%]		Current [µA]								470- 500 nm [ΔF/F%]		430-470 nm [ΔF/F%]		Current [µA]
Also used in	Expression time [days]	Oocyte batch	Recording	1st Application	2nd Application	1st Application	2nd Application	1st Application	2nd Application	inclusion criteria for analysis are met		Also used in	Expression time [days]	Oocyte batch	Recording	1st Application	2nd Application	1st Application	2nd Application	1st Application	2nd Application	inclusion criteria for analysis are met
	7	2	h20 #09	0	0	0	0	-2.5388	-2.503	Yes
	6	2	h19 #06	0	0	0	0	-2.4975	-2.6064	Yes
	6	2	h19 #15	0	0	0	0	-2.8584	-3.0589	Yes
	6	2	h19 #16	0	0	0	0	-2.8736	-3.0527	Yes
	4	2	h17 #05	0	0	0	0	-3.0784	-3.1884	Yes
	4	2	h17 #06	0	0	0	0	-2.8677	-2.965	Yes
	4	2	h17 #07	0	0	0	0	-2.6054	-2.6637	Yes
	4	2	h17 #25	0	0	0	0	-2.3014	-2.11	Yes
	3	2	h16 #01					-1.21683	-1.1743	No
	3	2	h16 #11	0	0	0	0	-2.3629	-2.3011	Yes
	3	2	h16 #12	0	0	0	0	-2.5527	-2.6617	Yes
	3	19	22a13 #17	0	0	0	0	-1.5036	-1.487	Yes
	3	19	22a13 #18	0	0	0	0	-1.91205	-1.91765	Yes
	4	19	22a14 #16	0	0	0	0	-2.1657	-2.2191	Yes
	4	19	22a14 #17	0	0	0	0	-2.2104	-2.27078	Yes
	P2X7(L536*)												P2X7(L536*)
				> 500 nm [ΔF/F%]		430-490 nm [ΔF/F%]		Current [µA]								470- 500 nm [ΔF/F%]		430-470 nm [ΔF/F%]		Current [µA]
Also used in	Expression time [days]	Oocyte batch	Recording	1st Application	2nd Application	1st Application	2nd Application	1st Application	2nd Application	inclusion criteria for analysis are met		Also used in	Expression time [days]	Oocyte batch	Recording	1st Application	2nd Application	1st Application	2nd Application	1st Application	2nd Application	inclusion criteria for analysis are met
	3	19	22a13 #19					-1.31405	-1.35305	No			4	18	b26 #14	0	0	0	0	-1.8048	-1.9109	Yes
	3	19	22a13 #20	0	0	0	0	-1.4317	-1.3979	Yes			4	18	b26 #40					-0.4186		No
	3	19	22a13 #21					-0.38275	-0.35523	No			3	18	b25 #05					-1.30083	-1.31516	No
	4	19	22a14 #12		0.245791	0	0	-1.6027	-1.6986	Yes
	4	19	22a14 #13	0	0	0	0	-1.9366		Yes
	4	19	22a14 #14	0	0	0	0	-1.8425	-1.8184	Yes
	4	19	22a14 #15					-1.0652	-1.1013	No
	P2X7(E537*)												P2X7(E537*)
				> 500 nm [ΔF/F%]		430-490 nm [ΔF/F%]		Current [µA]								470- 500 nm [ΔF/F%]		430-470 nm [ΔF/F%]		Current [µA]
Also used in	Expression time [days]	Oocyte batch	Recording	1st Application	2nd Application	1st Application	2nd Application	1st Application	2nd Application	inclusion criteria for analysis are met		Also used in	Expression time [days]	Oocyte batch	Recording	1st Application	2nd Application	1st Application	2nd Application	1st Application	2nd Application	inclusion criteria for analysis are met
	3	22	22a10 #25					-1.64156	-1.62816	No			14	12	b19 #19					-3.3495		No
	3	22	22a10 #26					-2.2461	-2.2721	No			7	12	b12 #03					-1.781	-1.895	No
	3	22	22a10 #27					-1.13175	-1.1696	No			7	12	b12 #12							No
	4	22	22a11 #01	0	0	0	0	-1.89	-1.8671	Yes			6	12	b11 #02	0	0	0	0	-2.792	-2.718	Yes
	4	22	22a11 #02					-1.3628	-1.3587	No			6	12	b11 #12	0	0	0	0	-3.25645	-3.40121	Yes
	4	22	22a11 #03					-2.2579	-2.3352	No			5	12	b10 #07	0	0	0	0	-2.632	-2.486	Yes
	5	22	22a12 #17	0	0	0	0	-3.44807	-3.54605	Yes			4	12	b09 #04					-2.5924	-2.5353	No
	5	22	22a12 #31	0	0	0	0	-1.6928	-1.7661	Yes			4	12	b09 #14					no current		No
													3	12	b08 #01					-2.1314	-2.1234	No
													3	12	b08 #18					-2.39	-2.118	No
													3	12	b08 #22					-1.51805	-1.50069	No
	P2X7(G538*)												P2X7(G538*)
				> 500 nm [ΔF/F%]		430-490 nm [ΔF/F%]		Current [µA]								470- 500 nm [ΔF/F%]		430-470 nm [ΔF/F%]		Current [µA]
Also used in	Expression time [days]	Oocyte batch	Recording	1st Application	2nd Application	1st Application	2nd Application	1st Application	2nd Application	inclusion criteria for analysis are met		Also used in	Expression time [days]	Oocyte batch	Recording	1st Application	2nd Application	1st Application	2nd Application	1st Application	2nd Application	inclusion criteria for analysis are met
	3	19	22a13 #22					-0.2141	-0.2093	No			4	18	b26 #13					no current		No
	3	19	22a13 #23					-0.22219	-0.21569	No			4	18	b26 #39					-0.5498	-0.6212	No
	4	19	22a14 #09					-0.27091	-0.27575	No			3	18	b25 #06					no current		No
	4	19	22a14 #10					-0.29848	-0.33732	No
	4	19	22a14 #11					-0.20601	-0.2174	No
	P2X7(E539*)												P2X7(E539*)
				> 500 nm [ΔF/F%]		430-490 nm [ΔF/F%]		Current [µA]								470- 500 nm [ΔF/F%]		430-470 nm [ΔF/F%]		Current [µA]
Also used in	Expression time [days]	Oocyte batch	Recording	1st Application	2nd Application	1st Application	2nd Application	1st Application	2nd Application	inclusion criteria for analysis are met		Also used in	Expression time [days]	Oocyte batch	Recording	1st Application	2nd Application	1st Application	2nd Application	1st Application	2nd Application	inclusion criteria for analysis are met
	3	19	22a13 #24					-0.4996	-0.49471	No			4	18	b26 #10					-1.7375	-1.7715	No
	3	19	22a13 #27	0	0	0	0	-1.13091	-1.04765	Yes			4	18	b26 #12					-1.2209	-1.2573	No
	3	19	22a13 #28	0	0	0	0	-1.22986	-1.19411	Yes			3	18	b25 #08					-0.1298	-0.1347	No
	4	19	22a14 #05					-0.378	-0.3876	No
	4	19	22a14 #06	0	0	0	0	-0.94722	-0.91639	Yes
	4	19	22a14 #07					-0.66502	-0.67959	No
	4	19	22a14 #08					-1.2866	-1.307	No
	P2X7(A564*)												P2X7(A564*)
				> 500 nm [ΔF/F%]		430-490 nm [ΔF/F%]		Current [µA]								470- 500 nm [ΔF/F%]		430-470 nm [ΔF/F%]		Current [µA]
Also used in	Expression time [days]	Oocyte batch	Recording	1st Application	2nd Application	1st Application	2nd Application	1st Application	2nd Application	inclusion criteria for analysis are met		Also used in	Expression time [days]	Oocyte batch	Recording	1st Application	2nd Application	1st Application	2nd Application	1st Application	2nd Application	inclusion criteria for analysis are met
	3	22	22a10 #11					-0.6099	-0.6617	No
	3	22	22a10 #12					-0.29524	-0.37147	No
Fig. 5D / plot	4	22	22a11 #16	0.656626	0.423674	0.678143	0.715448	-1.50989	-1.55049	Yes
Fig. 5D / plot	4	22	22a11 #17	0.291759	0.414529	0.653665	0.682078	-2.34975	-2.41175	Yes
	4	22	22a11 #18					-0.9461	-0.9452	No
	4	22	22a11 #40					-1.148	-0.981	No
	4	22	22a11 #41					-0.85645	-0.82238	No
	5	22	22a12 #01					-1.032	-0.888	No
	5	22	22a12 #02					-0.7574	-0.7802	No
	5	22	22a12 #03					-1.18054	-1.22778	No
Fig. 5D / plot	5	22	22a12 #14	1.20212	1.28358	0.267167	1.13298	-2.38921	-2.3831	Yes
	5	22	22a12 #33					-0.7773	-0.7254	No
	5	22	22a12 #37					-1.0512	-1.0202	No
Fig. 5D / plot	5	22	22a12 #38	0.888583	1.05045	0.829886	1.30621	-1.5702	-1.4795	Yes
Fig. 5D / plot	6	22	22a13 #29	1.05958	1.17536	0.821168	1.09229	-2.2623	-2.3247	Yes
	6	22	22a13 #30					-1.9076	-1.9134	No
	6	22	22a13 #31					-2.04218	-2.09113	No
	7	22	22a14 #01					-0.9022	-0.9357	No
	3	21	22a18 #15					-0.4801	-0.4849	No
	4	19	22a19 #02					-0.8059		No
Fig. 5D / plot	4	19	22a19 #14	0.336696	0.481113	0.0632	0.352983	-0.9598	-0.951	Yes
Fig. 5D / plot	4	19	22a19 #15	0.549705	0.63222	0.515291	0.636388	-1.072	-1.108	Yes
	4	19	22a19 #22					-0.92293	-0.90671	No
Fig. 5D / plot	4	19	22a19 #23	0	0.45795	0	0.367258	-1.9804	-1.885	Yes
	4	19	22a19 #24					-1.3807	-1.4157	No
	4	19	22a19 #37					-0.133		No
	4	21	22a19 #16					-0.10705	-0.12331	No
Fig. 5D / plot	4	21	22a19 #17	0.411769	0.942139	0.033548	0.80779	-1.714	-1.7359	Yes
Fig. 5D / plot	4	21	22a19 #25	0.417533	0.748793	0.36479	0.641888	-1.2942	-1.3126	Yes
Fig. 5D / plot	4	21	22a19 #26	0	0	0	0.162136	-1.5404	-1.5607	Yes
	5	19	22a20 #01					-0.6407	-0.58395	No
Fig. 5D / plot	5	19	22a20 #02	0.819876	0.672951	0.86496	1.00406	-1.21451	-1.17438	Yes
	5	19	22a20 #03					-1.3	-1.132	No
	5	19	22a20 #26					-0.972	-0.914	No
	5	19	22a20 #27					-0.49794	-0.47846	No
	5	19	22a20 #28					-0.49149	-0.59361	No
	5	19	22a20 #33					-0.85638	-0.8903	No
	5	19	22a20 #36					-1.0239	-1.1301	No
Fig. 5D / plot	5	19	22a20 #39	0	0	0	0	-0.9712	-0.8922	Yes
	5	19	22a20 #41					-0.70228	-0.73639	No
	5	19	22a20 #47					-1.8491	-1.5539	No
	5	19	22a20 #48					-0.4655		No
	5	19	22a20 #49					-0.545	-0.6098	No
	5	19	22a20 #50							No
	5	21	22a20 #04					-1.0058	-1.0446	No
Fig. 5D / plot	5	21	22a20 #30	0.71634	0.74831	0.255744	0.431023	-0.82725	-0.84182	Yes
Fig. 5D / plot	5	21	22a20 #31	0	0.07877	0	0.075598	-1.2684	-1.2971	Yes
	4	20	22a28 #21					-0.83049	-0.89692	No
	3	10	22a31 #39					-0.8272	-0.81582	No
	4	10	22b01 #31					-0.6391	-0.75749	No
	5	10	22b02 #01					-1.6807	-1.4448	No
	5	10	22b02 #02					-0.56122	-0.50935	No
	5	10	22b02 #11					-0.9291	-0.8968	No
	6	10	22b03 #10					-0.8986		No
	6	10	22b03 #12					-0.5675		No
	6	10	22b03 #18					-0.84343	-0.75101	No
	6	10	22b03 #23					-1.16789	-0.98313	No
	P2X7(L569*)												P2X7(L569*)
				> 500 nm [ΔF/F%]		430-490 nm [ΔF/F%]		Current [µA]								470- 500 nm [ΔF/F%]		430-470 nm [ΔF/F%]		Current [µA]
Also used in	Expression time [days]	Oocyte batch	Recording	1st Application	2nd Application	1st Application	2nd Application	1st Application	2nd Application	inclusion criteria for analysis are met		Also used in	Expression time [days]	Oocyte batch	Recording	1st Application	2nd Application	1st Application	2nd Application	1st Application	2nd Application	inclusion criteria for analysis are met
	3	22	22a10 #17					-0.57906	-0.52063	No
	3	22	22a10 #18					-0.2822	-0.2384	No
	4	22	22a11 #30					-0.8987	-0.8937	No
	4	22	22a11 #31					-0.2692	-0.1914	No
	4	22	22a11 #37					-0.66177	-0.61148	No
	4	22	22a11 #38					-0.70071	-0.6553	No
	5	22	22a12 #20					-0.2465	-0.1703	No
	5	22	22a12 #21					-0.5028	-0.5093	No
	5	22	22a12 #22					-1.2815	-1.3384	No
	8	22	22a15 #02					-0.412	-0.4363	No
	8	22	22a15 #10					-0.6018	-0.6926	No
	P2X7(I577*)												P2X7(I577*)
				> 500 nm [ΔF/F%]		430-490 nm [ΔF/F%]		Current [µA]								470- 500 nm [ΔF/F%]		430-470 nm [ΔF/F%]		Current [µA]
Also used in	Expression time [days]	Oocyte batch	Recording	1st Application	2nd Application	1st Application	2nd Application	1st Application	2nd Application	inclusion criteria for analysis are met		Also used in	Expression time [days]	Oocyte batch	Recording	1st Application	2nd Application	1st Application	2nd Application	1st Application	2nd Application	inclusion criteria for analysis are met
	3		22a10 #03					-0.23514	-0.21248	No
	3		22a10 #04					-0.23196	-0.19459	No
	4		22a11 #32					-0.2027	-0.1557	No
	4		22a11 #33					-0.1038	-0.0836	No
	4		22a11 #34					-0.1233	-0.0892	No
	5		22a12 #18							No
	5		22a12 #19							No
	5		22a12 #30					-0.399	-0.3211	No
	8		22a15 #01					no current		No
	P2X7(Q585*)												P2X7(Q585*)
				> 500 nm [ΔF/F%]		430-490 nm [ΔF/F%]		Current [µA]								470- 500 nm [ΔF/F%]		430-470 nm [ΔF/F%]		Current [µA]
Also used in	Expression time [days]	Oocyte batch	Recording	1st Application	2nd Application	1st Application	2nd Application	1st Application	2nd Application	inclusion criteria for analysis are met		Also used in	Expression time [days]	Oocyte batch	Recording	1st Application	2nd Application	1st Application	2nd Application	1st Application	2nd Application	inclusion criteria for analysis are met
	3	19	22a18 #06	0	0	0	0	-2.1398	-2.107	Yes			6	16	b26 #25					-1.0724	-1.1014	No
	3	19	22a18 #07	0	0	0	0	-1.5234	-1.52778	Yes			6	16	b26 #28					-1.1388	-1.2184	No
	3	19	22a18 #08	0	0	0	0	-1.0411	-1.0183	Yes			5	16	b25 #02	0	0	0	0	-2.19178	-2.27245	Yes
	5	19	22a20 #42	0	0	0	0	-1.8409	-1.8911	Yes			4	16	b24 #06	0	0	0	0	-2.1997	-2.1717	Yes
													3	16	b23 #07					-0.1493		No
	P2X7(G586*)												P2X7(G586*)
				> 500 nm [ΔF/F%]		430-490 nm [ΔF/F%]		Current [µA]								470- 500 nm [ΔF/F%]		430-470 nm [ΔF/F%]		Current [µA]
Also used in	Expression time [days]	Oocyte batch	Recording	1st Application	2nd Application	1st Application	2nd Application	1st Application	2nd Application	inclusion criteria for analysis are met		Also used in	Expression time [days]	Oocyte batch	Recording	1st Application	2nd Application	1st Application	2nd Application	1st Application	2nd Application	inclusion criteria for analysis are met
	3	19	22a18 #12	0	0	0	0	-1.51606	-1.47906	Yes			6	16	b26 #24					-1.06932	-1.16778	No
	4	19	22a19 #20	0	0	0	0	-1.4275	-1.3719	Yes			6	16	b26 #26					-1.1115		No
	4	19	22a19 #21					-0.7737	-0.8641	No			6	16	b26 #27					-2.21929	-2.259	No
	4	19	22a19 #30					-1.3591	-1.3673	No			5	16	b25 #20					-1.3508	-1.36702	No
	5	19	22a20 #40					-0.7912		No			4	16	b24 #04					-0.16217	-0.1914	No
	5	19	22a20 #43					no current		No			3	16	b23 #08					-0.25789	-0.27245	No
	5	19	22a20 #44	0	0	0	0	-0.9424	-0.9458	Yes
	P2X7(Y595*)												P2X7(Y595*)
				> 500 nm [ΔF/F%]		430-490 nm [ΔF/F%]		Current [µA]								470- 500 nm [ΔF/F%]		430-470 nm [ΔF/F%]		Current [µA]
Also used in	Expression time [days]	Oocyte batch	Recording	1st Application	2nd Application	1st Application	2nd Application	1st Application	2nd Application	inclusion criteria for analysis are met		Also used in	Expression time [days]	Oocyte batch	Recording	1st Application	2nd Application	1st Application	2nd Application	1st Application	2nd Application	inclusion criteria for analysis are met
	3	19	22a18 #01							No			9	16	b25 #23					-1.8801		No
	3	19	22a18 #09	0	0	0	0	-1.5211	-1.4856	Yes			7	16	b23 #20	0	0	0	0	-2.306	-2.493	Yes
	3	19	22a18 #10					-2.3194	-2.3312	No			6	16	b22 #01	0	0	0	0	-1.90121	-2.07654	Yes
	3	19	22a18 #11	0	0	0	0	-1.6481	-1.6379	Yes			6	16	b22 #06	0	0	0	0	-2.1133	-2.1135	Yes
	3	19	22a18 #13	0	0	0	0	-2.1067	-2.1542	Yes			6	16	b22 #07	0	0	0	0	-1.4504	-1.4827	Yes
													6	16	b22 #20	0	0	0	0	-2.3421	-2.49829	Yes
													3	16	b19 #06	0	0	0	0	-2.2249	-2.1835	Yes
													3	16	b19 #16	0	0	0	0	-2.0825	-2.2079	Yes
													3	16	b19 #22					-2.1671	-1.86	No
	P2X7(596*)												P2X7(596*)
				> 500 nm [ΔF/F%]		430-490 nm [ΔF/F%]		Current [µA]								470- 500 nm [ΔF/F%]		430-470 nm [ΔF/F%]		Current [µA]
Also used in	Expression time [days]	Oocyte batch	Recording	1st Application	2nd Application	1st Application	2nd Application	1st Application	2nd Application	inclusion criteria for analysis are met		Also used in	Expression time [days]	Oocyte batch	Recording	1st Application	2nd Application	1st Application	2nd Application	1st Application	2nd Application	inclusion criteria for analysis are met
	3	19	22a18 #04	0	0	0	0	-1.8713	-2.0093	Yes			6	11	d22 #21					-1.09	-1.169	No
	3	19	22a18 #05	0	0	0	0	-2.11797	-2.14773	Yes			4	11	d20 #15	0	0	0	0	-1.411	-1.376	Yes
	3	19	22a18 #14	0	0	0	0	-2.405	-2.3353	Yes			4	11	d20 #16	0	0	0	0	-2.175	-2.2192	Yes
													3	11	d19 #10					-2.2205		No
													8	16	b24 #19							No
													7	16	b23 #00	0	0	0	0	-1.799	-1.653	Yes
													6	16	b22 #05					-0.647	-0.563	No
													6	16	b22 #08	0	0	0	0	-1.517	-1.5259	Yes
													6	16	b22 #17	0	0	0	0	-2.6619	-2.8159	Yes
													6	16	b22 #18	0	0	0	0	-3.3203	-3.4804	Yes
													6	16	b22 #19	0	0	0	0	-2.488	-2.5936	Yes
													3	16	b19 #05	0	0	0	0	-2.994	-3.132	Yes
													3	16	b19 #17	0	0	0	0	-2.9111	-2.9485	Yes
													3	16	b19 #18	0	0	0	0	-1.5509	-1.687	Yes
