# Supplementary material for: Improved ANAP incorporation and VCF analysis reveal details of P2X7 current facilitation and a limited conformational interplay between ATP binding and the intracellular ballast domain
Source: eLife journal article supplement (doi:10.7554/elife.82479), 2023-01-04
Supplement: table2-data2 [file elife-82479-table2-data2-v2.zip]

## Sheet: Sheet1
		Wt									F11*					S124*							F11*, S124C												K127*						D423*					A564*
	[M]	22k18#02	22k18#15	22k17#05	22k17#11	22k17#15	22k17-16	22k19#08	22k20#05	22m05#05	22k24-14	22k25-09	22k25-10	22k25-13	22l09-10	22k24-05	22k24-11	22k25-11	22k25-12	22l08-01	22l09-02	22l09-11	22k18-05	22k18-06	22k18-08	22k12-16	22k19-05	22k19-06	22k19-07	22k19-09	22k20-08	22k20-09	22k20-10	22k20-11	22k24-18	22k25-03	22k25-04	22k25-05	22k25-06	22l08-06	22k21-03	22k21-04	22l08-09	22l08-19	22l08-20	22k24-03	22k24-09	22k24-16	22k24-17
10 uM	1e-05							13.365	17.5722	1.70705	0.093633	5.86236	7.16681	5.96853	3.70768	1.64997			0.303951	8.40855	8.9003	2.92979					1.3181	1.86722	0.652432	0.466853	1.03017	0.387597	0.205973	2.10526		19.446			14.2444	38.76
30 uM	3e-05	45.6284				62.2415	45.8637	45.3586	65.4118		18.0462	32.5641	59.1494	33.2593		19.5489	12.7155	24.2871	13.1628		65.597	54.5594		24.0871	39.3778		18.4762	36.4033			26.0526	7.69231	4.3222	3.6	37.373	62.3507	56.169		61.9512	63.773	29.7052		23.5867	26.6455	46.5562	71.5819		28.6561	27.5292
100 uM	0.0001		63.8536	78.4674		85.6145	88.47	73.6958	77.9984		64.9151	67.5516	75.7916	61.3805	70.1703	74.8271	67.1413	70.9931	42.73		91.0204	83.8227	86.5217	63.1485	85.027		71.2454	81.2163	67.1059	62.5972	69.1786	70.9059	51.133	45.0142	71.0339	80.8667	75.1326	57.2771	77.46	88.5714	74.3618			66.7304	85.6246	96.0809	89.5008	73.9546	72.3597
300 uM	0.0003	100	100	100	100	100	100	100	100	100	100	100	100	100	100	100	100	100	100	100	100	100	100	100	100	100	100	100	100	100	100	100	100	100	100	100	100	100	100	100	100	100	100	100	100	100	100	100	100
1 mM	0.001				95.7631	108.955	107.321		108.089		117.039	110.052	108.298	107.872	123.168	117.223	114.862	112.397	110.561		110.085	113.379	112.203	124.074	111.714	105.951	128.876	106.747			126.803	123.234	125.903	140.857	120.155	113.355	123.048		107.005	110.924		112.624		128.261	102.607	111.688	105.359	119.396	109.34
3 mM	0.003					114.022	107.122	132.334			128.602	123.339	108.687	118.911	126.264	127.918	125.641	125.991	144.237				119.912	134.441	119.567		134.181					133.775		153.541	128.489	121.065	137.065		121.594							117.491			126.26
10 mM	0.01
	[M]
10 uM	1e-05							0.100994	0.132786	0.0128995	0.00072808	0.0455852	0.0557285	0.0464108	0.0288306	0.0114393			0.0021073	0.0582966	0.0617059	0.0203123					0.00858471	0.0121611	0.00424925	0.00304058	0.00670942	0.00252439	0.00134149	0.0137114		0.141875			0.103925	0.282787
30 uM	3e-05	0.344796				0.470335	0.346574	0.342758	0.494291		0.140326	0.253216	0.459941	0.258622		0.135533	0.0881569	0.168383	0.091258		0.454785	0.378261		0.156878	0.256465		0.120334	0.237092			0.169679	0.0500995	0.0281502	0.0234466	0.272667	0.454901	0.4098		0.451986	0.465278	0.2316		0.183897	0.207745	0.362981	0.51348		0.20556	0.197476
100 uM	0.0001		0.482517	0.592948		0.646956	0.668533	0.556891	0.589404		0.504775	0.525276	0.589349	0.47729	0.545638	0.518777	0.465492	0.492196	0.296248		0.631046	0.581144	0.563511	0.411282	0.553775		0.464017	0.528956	0.437056	0.407692	0.450556	0.461806	0.333026	0.293175	0.518252	0.58999	0.548155	0.417885	0.565136	0.646203	0.57977			0.520271	0.667582	0.689219	0.642018	0.5305	0.519059
300 uM	0.0003	0.755661	0.755661	0.755661	0.755661	0.755661	0.755661	0.755661	0.755661	0.755661	0.777592	0.777592	0.777592	0.777592	0.777592	0.693301	0.693301	0.693301	0.693301	0.693301	0.693301	0.693301	0.651294	0.651294	0.651294	0.651294	0.651294	0.651294	0.651294	0.651294	0.651294	0.651294	0.651294	0.651294	0.729584	0.729584	0.729584	0.729584	0.729584	0.729584	0.779661	0.779661	0.779661	0.779661	0.779661	0.717332	0.717332	0.717332	0.717332
1 mM	0.001				0.723645	0.823332	0.810986		0.816785		0.910088	0.855755	0.842118	0.838803	0.957746	0.812711	0.79634	0.779248	0.766523		0.763222	0.78606	0.730771	0.808087	0.727588	0.690055	0.839361	0.695239			0.825862	0.802613	0.819998	0.917393	0.876631	0.827016	0.897739		0.78069	0.809282		0.878088		1	0.799983	0.80117	0.755777	0.856466	0.784328
3 mM	0.003					0.861618	0.809479	1			1	0.959075	0.845138	0.924642	0.981821	0.886861	0.871071	0.873495	1				0.780979	0.875608	0.778735		0.873911					0.87127		1	0.937433	0.883271	1		0.887126							0.842803			0.905707
10 mM	0.01
[truncated: 5 more columns]
